# Supplementary material for: Photocarboxylation of remote C–H bonds through nitrogen-centred radical 1,5-hydrogen atom transfer
Source: Royal Society of Chemistry journal article supplement (doi:10.1039/d3gc01426f), 2023-01-01
Supplement: d3gc01426f1.pdf [file d3gc01426f1.pdf]

## Supporting Information

### **Photocarboxylation of Remote C–H Bond through Nitrogen-Centred Radicals 1,5-Hydrogen Atom Transfer**

Wenke Li, Beiqi Sun, Lei Zhang, Fanyang Mo\*

## Contents

|                                                                 |    |
|-----------------------------------------------------------------|----|
| 1. General information.....                                     | 3  |
| 2. Complementary Reaction Optimization Data.....                | 4  |
| 3. General Procedure for Carbocarboxylation of substrates ..... | 7  |
| 4. Preparation of substrates .....                              | 8  |
| 5. Structures of hydroxylamine derivatives .....                | 9  |
| 6. Structures of carboxylation products .....                   | 10 |
| 7. Analytical Data of the Substrates and Products.....          | 12 |
| 8. References.....                                              | 66 |

## 1. General information

Unless otherwise noted, all experiments were carried out under an inert atmosphere in a nitrogen-filled glovebox or by standard Schlenk techniques. All solvents were purchased from J&K Scientific and stored in a nitrogen-filled glovebox over 4Å molecular sieves. Bis(catecholato)diboron ( $B_2cat_2$ ) was purchased from Beijing Innochem Science & Technology co., LTD (Innochem) and stored in the glovebox. Purification of the products was conducted by column chromatography on silica gel (200 - 300 mesh, in some cases 300-400 mesh were used, from Qingdao, China). Thin-layer chromatography (TLC) was performed on silica gel plates (10 - 40  $\mu m$ ) purchased from WISH CHEMICAL, using UV light (254/ 366 nm) or phosphomolybdic acid (PMA) in ethanol (5%) for detection. The substrates were purchased from commercial sources unless otherwise noted.

NMR spectra were measured on a Bruker ARX400 ( $^1H$  at 400 MHz,  $^{13}C$  at 101 MHz, ) magnetic resonance spectrometer. The chemical shifts are reported as parts per million (ppm) referenced to residual protium or carbon of the solvents;  $CHCl_3$ ,  $\delta H$  (7.26 ppm) and  $\delta C$  (77.00 ppm); Coupling constants are reported in Hertz (Hz). Data for  $^1H$  NMR spectra are reported as follows: chemical shift (ppm, referenced to protium; s = singlet, d = doublet, t = triplet, q = quartet, dd = doublet of doublets, td = triplet of doublets, ddd = doublet of doublet of doublets, m = multiplet, coupling constant (Hz), and integration). HRMS data were obtained on a VG ZAB-HS mass spectrometer, Bruker Apex IV FTMS spectrometer. GC-MS or FID data were measured using the Agilent Technologies 7890B GC and the Agilent Technologies 5977B MSD. The FID yields were all based on standard curves with 5 points and minimum 0.996  $R^2$  value (or 4 points and minimum 0.997  $R^2$  value).

## 2. Complementary Reaction Optimization Data

**Table S1** Optimization of reaction conditions of three-component

Photocarboxylation<sup>a</sup>

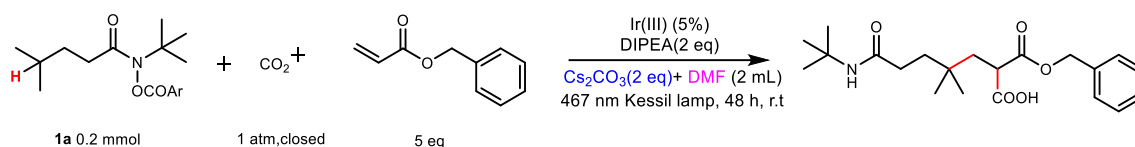

| entry | acrylic ester (equiv) | PC (equiv)                                                                                | light source | additive (equiv) | yield <sup>b</sup> (%) |
|-------|-----------------------|-------------------------------------------------------------------------------------------|--------------|------------------|------------------------|
| 1     | 2.0                   | (Ir[dF(CF <sub>3</sub> )ppy] <sub>2</sub> (dtbpy))PF <sub>6</sub> (2%)                    | 456 nm       | DIPEA (2.0)      | 42%                    |
| 2     | 2.0                   | Ir(p-F-ppy) <sub>3</sub> (2%)                                                             | 456 nm       | DIPEA (2.0)      | 35%                    |
| 3     | 2.0                   | (Ir[dF(CF <sub>3</sub> )ppy] <sub>2</sub> (4,4'-CF <sub>3</sub> bpy))PF <sub>6</sub> (2%) | 456 nm       | DIPEA (2.0)      | 32%                    |
| 4     | 2.0                   | Eosin Y (2%)                                                                              | 456 nm       | DIPEA (2.0)      | 47%                    |
| 5     | 2.0                   | 4CzIPN (2%)                                                                               | 456 nm       | DIPEA (2.0)      | 29%                    |
| 6     | 2.0                   | [Ir(dFCF <sub>3</sub> ppy) <sub>2</sub> (5,5'-dCF <sub>3</sub> bpy)]PF <sub>6</sub> (2%)  | 456 nm       | DIPEA (2.0)      | 27%                    |
| 7     | 2.0                   | [Ir{dFCF <sub>3</sub> ppy} <sub>2</sub> (bpy)]PF <sub>6</sub> (2%)                        | 456 nm       | DIPEA (2.0)      | 23%                    |
| 8     | 5.0                   | (Ir[dF(CF <sub>3</sub> )ppy] <sub>2</sub> (dtbpy))PF <sub>6</sub> (2%)                    | 456 nm       | DIPEA (2.0)      | 58%                    |
| 9     | 5.0                   | (Ir[dF(CF <sub>3</sub> )ppy] <sub>2</sub> (dtbpy))PF <sub>6</sub> (2%)                    | 467 nm       | DIPEA (2.0)      | 71%                    |
| 10    | 5.0                   | (Ir[dF(CF <sub>3</sub> )ppy] <sub>2</sub> (dtbpy))PF <sub>6</sub> (2%)                    | 467 nm       | DBU (2.0)        | trace                  |
| 11    | 5.0                   | (Ir[dF(CF <sub>3</sub> )ppy] <sub>2</sub> (dtbpy))PF <sub>6</sub> (2%)                    | 467 nm       | DMAP (2.0)       | 10.5%                  |

|                       |            |                                                                        |               |                    |                  |
|-----------------------|------------|------------------------------------------------------------------------|---------------|--------------------|------------------|
| <b>12<sup>c</sup></b> | <b>5.0</b> | (Ir[dF(CF <sub>3</sub> )ppy] <sub>2</sub> (dtbpy))PF <sub>6</sub> (5%) | <b>467 nm</b> | <b>DIPEA (2.0)</b> | <b>82% (75%)</b> |
| 13                    | 5.0        | none                                                                   | 467 nm        | DIPEA (2.0)        | none             |
| 14                    | 5.0        | (Ir[dF(CF <sub>3</sub> )ppy] <sub>2</sub> (dtbpy))PF <sub>6</sub> (5%) | none          | DIPEA (2.0)        | trace            |
| 15                    | 5.0        | (Ir[dF(CF <sub>3</sub> )ppy] <sub>2</sub> (dtbpy))PF <sub>6</sub> (5%) | 467 nm        | none               | none             |

a: Reaction Condition: **1a** (0.2 mmol), acrylic ester (Benzyl acrylate), photocatalyst, DMF (N,N-Dimethylformamide) (2 mL), additive, then irradiated by Kessil 40 W blue LED for 24 h. After the reaction, the resulting mixture was diluted with 3 mL EA and quenched by 3 mL 1 N HCl, then stirred for 5 min. The reaction mixture was extracted by EA six times and the combined organic phases were concentrated in vacuo.

b: NMR yield, the yield in bracket is isolated yield.

c: The reaction time was 48 h.

**Table S2** Optimization of reaction conditions of remote benzylic C-H bond carboxylation

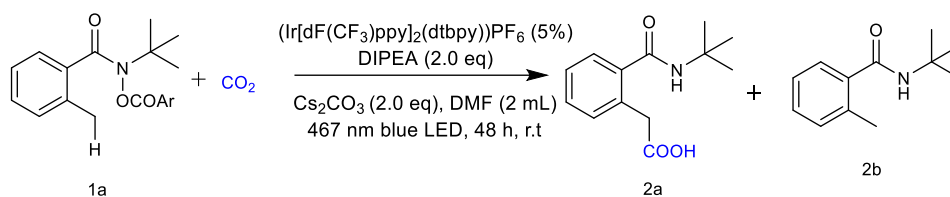

| Entry | Deviations                                                                                     | Yields [%] <sup>(b)</sup> |            |
|-------|------------------------------------------------------------------------------------------------|---------------------------|------------|
|       |                                                                                                | <b>2 a</b>                | <b>2 b</b> |
| 1     | none                                                                                           | 75 (71)                   | 20         |
| 2     | no light                                                                                       | trace                     | trace      |
| 3     | no $(\text{Ir}[\text{dF}(\text{CF}_3)\text{ppy}]_2(\text{dtbbpy}))\text{PF}_6$                 | trace                     | 63         |
| 4     | $\text{N}_2$ instead of $\text{CO}_2$                                                          | trace                     | 85         |
| 5     | no $\text{Cs}_2\text{CO}_3$                                                                    | 67                        | 23         |
| 6     | 4CzIPN instead of $(\text{Ir}[\text{dF}(\text{CF}_3)\text{ppy}]_2(\text{dtbbpy}))\text{PF}_6$  | 45                        | 44         |
| 7     | no DIPEA                                                                                       | trace                     | 55         |
| 8     | Eosin Y instead of $(\text{Ir}[\text{dF}(\text{CF}_3)\text{ppy}]_2(\text{dtbbpy}))\text{PF}_6$ | 32                        | 55         |
| 9     | $\text{CH}_3\text{CN}$ instead of DMF                                                          | 44                        | 50         |
| 10    | $(\text{Ir}[\text{dF}(\text{CF}_3)\text{ppy}]_2(\text{dtbbpy}))\text{PF}_6$ (2%)               | 65                        | 18         |
| 11    | 24 h                                                                                           | 67                        | 19         |

[a] Reaction condition: **1a** (0.2 mmol),  $(\text{Ir}[\text{dF}(\text{CF}_3)\text{ppy}]_2(\text{dtbbpy}))\text{PF}_6$  (5%), DIPEA (1.0 eq),  $\text{Cs}_2\text{CO}_3$  (2.0 eq), DMF (2 mL), irradiation by Kessil 40 W blue LED for 48 h under 1 atm  $\text{CO}_2$  at ambient temperature. [b] <sup>1</sup>H NMR yields using 1,1,2,2-tetrachloroethane as an internal standard and yields of isolated products in parentheses. DMF= N,N-Dimethylformamide, DIPEA= N,N-Diisopropylethylamine, 4CzIPN=2,4,5,6-tetrakis(carbazol-9-yl)-1,3-dicyanobenzene, Eosin Y= Solvent Red 43.

### 3. General Procedure for Carbocarboxylation of substrates

A 50 mL Schlenk tube equipped with a magnetic stir bar was added substrate(0.2 mmol 1eq), alkene(1 mmol, 5 eq), base (0.4 mmol, 2 eq), PC (5%), DIPEA(0.4 mmol, 2 eq),solvent (2 ml) in glovebox. Then the Schlenk tube was sealed and degassed via vacuum evacuation and subsequent backfilled with CO<sub>2</sub> for three times. Then, the reaction was placed under a blue LED (2-meter strips, 18 W) and irradiated for 48 hr. at rt. The reaction was quenched with 1 M HCl , then extracted 3 times with EtOAc. The combined organic layers were dried over anhydrous Na<sub>2</sub>SO<sub>4</sub> and concentrated under reduced pressure. The crude product was purified by column chromatography isolation on silica gel or prepared TLC to give the product.

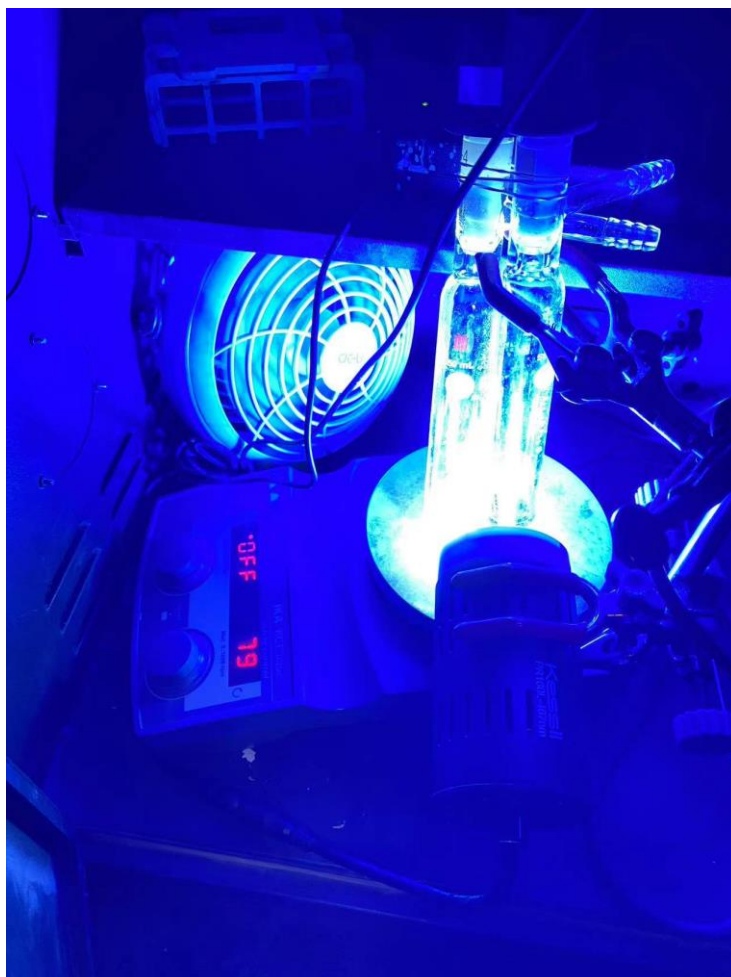

## 4. Preparation of substrates

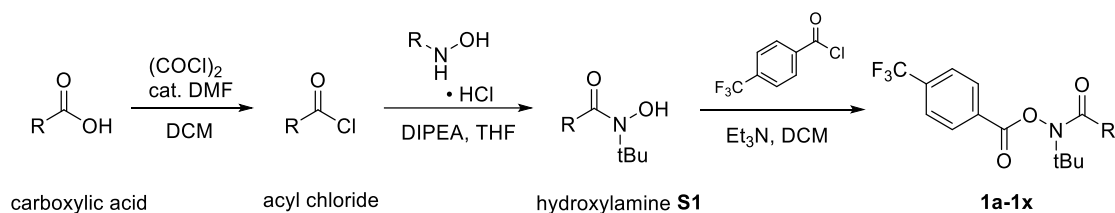

The procedure was according to the literature<sup>1</sup>.

**Step 1:** To a solution of carboxylic acid (1.0 equiv) and 3-5 drops of anhydrous DMF in anhydrous CH<sub>2</sub>Cl<sub>2</sub> (0.5 M) at 0 °C, oxalyl chloride (1.5 equiv) was added dropwise over 10 minutes. The reaction was vigorously stirred at room temperature for 3 h. The solvent was removed in vacuum. Anhydrous CH<sub>2</sub>Cl<sub>2</sub> was added to remove the residual oxalyl chloride in vacuum. Then the resulting acyl chloride was dissolved in anhydrous DCM and used directly for the next step without further purification.

**Step 2:** A solution of the N-(tert-butyl)hydroxylamine hydrochloride (1.0 equiv, or N-isopropylhydroxylamine hydrochloride for **1f**, or N-cyclohexylhydroxylamine hydrochloride for **1g**) in anhydrous THF (0.4 M) was cooled to 0 °C, treated with DIPEA (2.0 equiv) and stirred for 15 minutes. The acyl chloride (1.0 equiv) in anhydrous acetonitrile was added dropwise over 15 minutes. The mixture was allowed to warm to room temperature overnight. The mixture was diluted with saturated NaHCO<sub>3</sub> and EtOAc, the layers were separated. The aqueous layer was extracted with EtOAc (2 x), the combined organic layers were washed with 1 M HCl, saturated NaHCO<sub>3</sub> and brine, successively, and then evaporated. Purification by column chromatography on silica gel eluting with Petroleum ether and EtOAc gave the hydroxylamine **S1**.

**Step 3:** To a solution of hydroxylamine **S1** (1.05 equiv) in anhydrous CH<sub>2</sub>Cl<sub>2</sub> (0.35 M) at 0 °C, Et<sub>3</sub>N (1.5 equiv) was added dropwise. 4-trifluoromethyl-benzoyl chloride (1.0 equiv) was then added dropwise over 5 minutes. The reaction was vigorously stirred at room temperature for 2 h. After removing the solvent, the resulting residue was added saturated NaHCO<sub>3</sub> and THF and stirred for 30 minutes. Then, the layers were separated. The aqueous layer was extracted with EtOAc again, the combined organic layers were washed with 1 M HCl, saturated NaHCO<sub>3</sub> and brine, successively, and then evaporated. Purification by column chromatography on silica gel gave **1a-1p**.



## 5. Structures of hydroxylamine derivatives

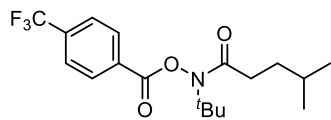

1a

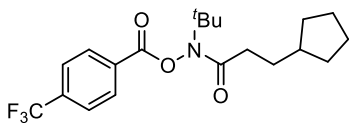

1b

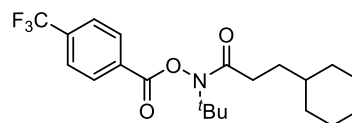

1c

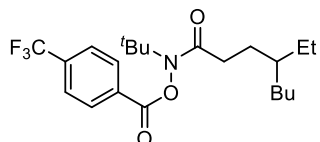

1d

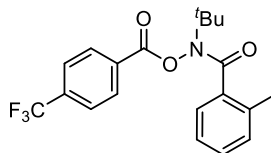

1e

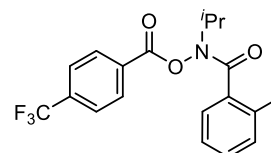

1f

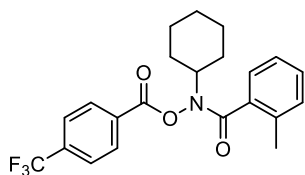

1g

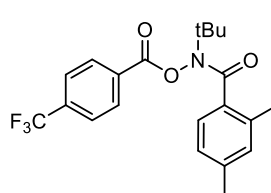

1h

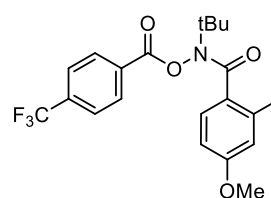

1i

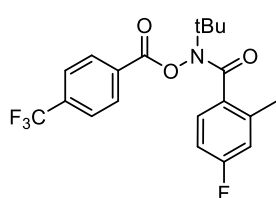

1j

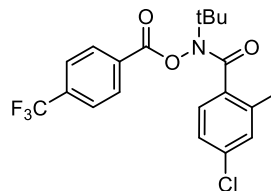

1k

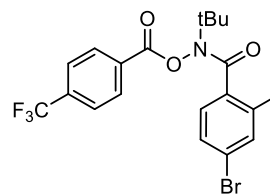

1l

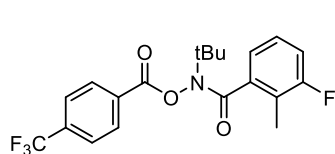

1m

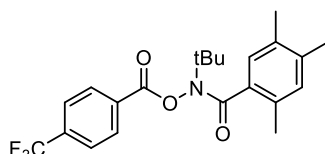

1n

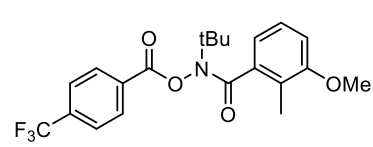

1o

## 6. Structures of carboxylation products

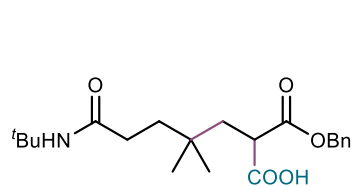

2a

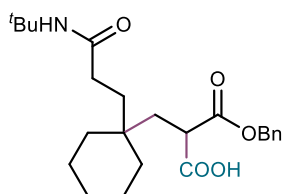

2b

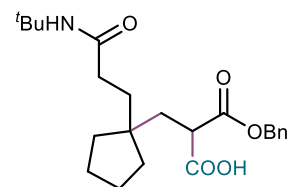

2c

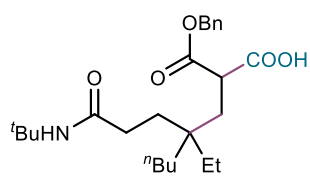

2d

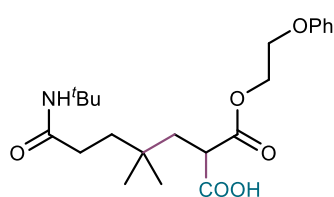

2e

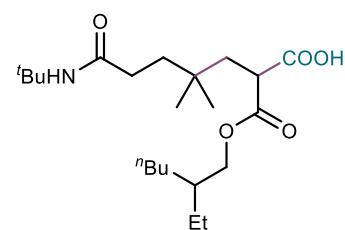

2f

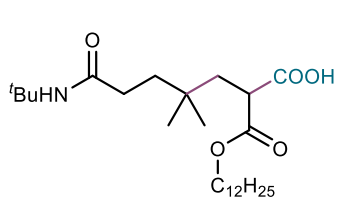

2g

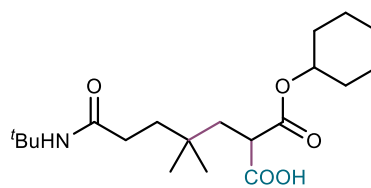

2h

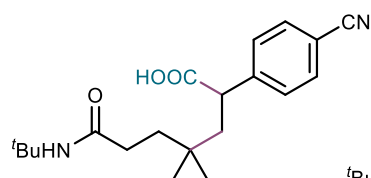

2i

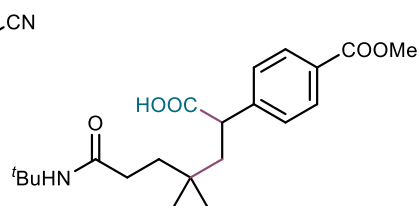

2j

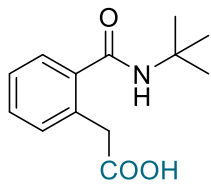

3a

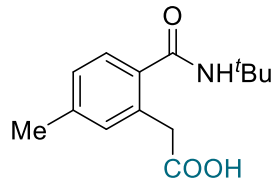

3b

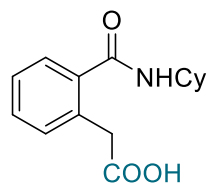

3c

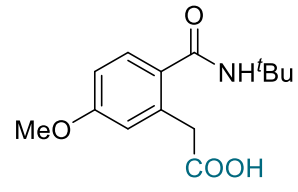

3d

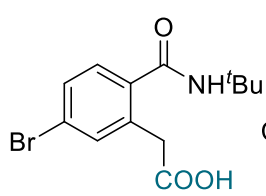

3e

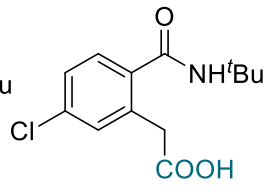

3f

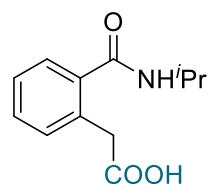

3g

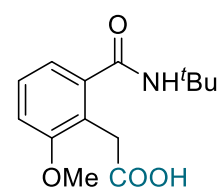

3h

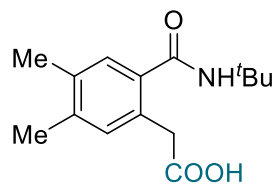

3i

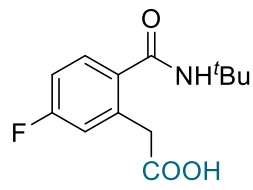

3j

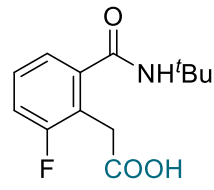

3k

## 7. Analytical Data of the Substrates and Products

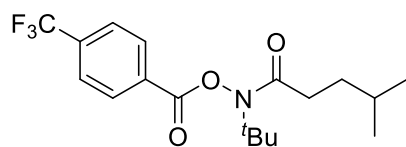

**1a**

**N-(tert-butyl)-4-methyl-N-((4-(trifluoromethyl)benzoyl)oxy)pentanamide (1a)** 76% overall yield, white solid.

**<sup>1</sup>H NMR** (400 MHz, CDCl<sub>3</sub>) δ 8.23 (d, J = 8.1 Hz, 2H), 7.80 (d, J = 8.2 Hz, 2H), 2.26 (dt, J = 15.0, 7.1 Hz, 1H), 2.10 (dt, J = 18.1, 7.0 Hz, 1H), 1.48 (s, 12H), 0.84 – 0.76 (m, 6H).

**<sup>13</sup>C NMR** (101 MHz, CDCl<sub>3</sub>) δ 175.11, 164.63, 135.88 (q, J = 33.0 Hz), 130.49, 130.27, 126.14 (q, J = 3.7 Hz), 123.44 (q, J = 272.9 Hz), 62.95, 33.01, 32.36, 27.64, 27.59, 22.46, 22.37.

All data matched that reported in the literature<sup>1</sup>.

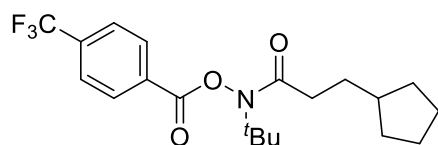

**1b**

**N-(tert-butyl)-3-cyclopentyl-N-((4-(trifluoromethyl)benzoyl)oxy)propanamide (1b)** 54% overall yield, white solid.

**<sup>1</sup>H NMR** (400 MHz, CDCl<sub>3</sub>) δ 8.23 (d, J = 8.1 Hz, 2H), 7.79 (d, J = 8.3 Hz, 2H), 2.28 (dt, J = 15.3, 7.5 Hz, 1H), 2.11 (dt, J = 15.7, 7.5 Hz, 1H), 1.71 – 1.53 (m, 5H), 1.52 – 1.37 (m, 13H), 1.05 – 0.92 (m, 2H).

**<sup>13</sup>C NMR** (101 MHz, CDCl<sub>3</sub>) δ 174.97, 164.58, 135.79 (q, J = 33.0 Hz), 130.45, 130.29, 126.07 (q, J = 3.7 Hz), 123.41 (q, J = 272.9 Hz), 62.86, 39.58, 33.55, 32.50, 32.45, 30.35, 27.52, 25.04.

All data matched that reported in the literature<sup>1</sup>.

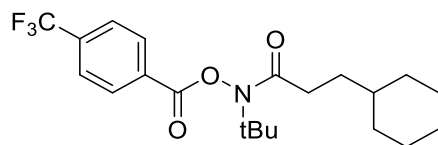

**1c**

**N-(tert-butyl)-3-cyclohexyl-N-((4-(trifluoromethyl)benzoyl)oxy)propanamide (1c)** 70% overall yield, white solid.

**<sup>1</sup>H NMR** (400 MHz, CDCl<sub>3</sub>) δ 8.22 (d, *J* = 8.1 Hz, 2H), 7.79 (d, *J* = 8.2 Hz, 2H), 2.26 (dt, *J* = 15.8, 7.8 Hz, 1H), 2.10 (dt, *J* = 15.8, 7.7 Hz, 1H), 1.66 – 1.52 (m, 5H), 1.52 – 1.40 (m, 11H), 1.20 – 1.01 (m, 4H), 0.91 – 0.71 (m, 2H).

**<sup>13</sup>C NMR** (101 MHz, CDCl<sub>3</sub>) δ 175.26, 164.61, 135.86 (q, *J* = 33.0 Hz), 130.50, 130.30, 126.12 (q, *J* = 3.7 Hz), 123.44 (q, *J* = 272.9 Hz), 62.95, 37.15, 33.21, 33.15, 31.81, 31.60, 27.60, 26.58, 26.27.

All data matched that reported in the literature<sup>1</sup>.

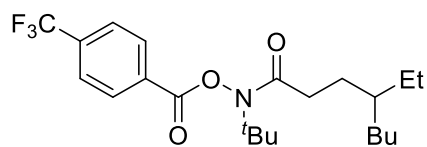

**1d**

### **N-(tert-butyl)-4-ethyl-N-((4-(trifluoromethyl)benzoyl)oxy)octanamide (1d)**

37% overall yield, colorless oil.

**<sup>1</sup>H NMR** (400 MHz, CDCl<sub>3</sub>) δ 8.23 (d, *J* = 8.1 Hz, 2H), 7.81 (d, *J* = 8.2 Hz, 2H), 2.23 (dt, *J* = 16.1, 8.0 Hz, 1H), 2.09 (dt, *J* = 15.8, 8.0 Hz, 1H), 1.59 – 1.53 (m, 2H), 1.49 (s, 9H), 1.23 – 1.11 (m, 9H), 0.85 – 0.75 (m, 6H).

**<sup>13</sup>C NMR** (101 MHz, CDCl<sub>3</sub>) δ 175.20, 164.59, 135.82 (q, *J* = 33.0 Hz), 130.44, 130.29, 126.05 (q, *J* = 3.7 Hz), 123.40 (q, *J* = 272.9 Hz), 62.87, 38.39, 32.58, 32.00, 28.75, 27.67, 27.52, 25.73, 23.01, 13.98, 10.69.

All data matched that reported in the literature<sup>1</sup>.

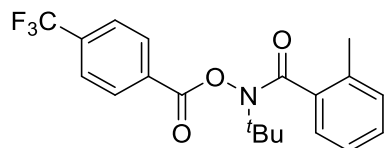

**1e**

### **N-(tert-butyl)-2-methyl-N-((4-(trifluoromethyl)benzoyl)oxy)benzamide (1e)**

14% overall yield, white solid.

**<sup>1</sup>H NMR** (400 MHz, CDCl<sub>3</sub>) δ 7.74 (d, *J* = 7.7 Hz, 2H), 7.60 (d, *J* = 8.3 Hz, 2H), 7.20 (d, *J* = 7.4 Hz, 1H), 7.10 – 6.98 (m, 3H), 2.42 (s, 3H), 1.61 (s, 9H).

**<sup>13</sup>C NMR** (101 MHz, CDCl<sub>3</sub>) δ 171.49, 164.27, 136.10, 135.20 (q, *J* = 32.9 Hz), 134.71, 130.09, 130.05, 129.76, 129.01, 125.72, 125.56 (q, *J* = 3.7 Hz), 125.16, 123.30 (q, *J* = 272.9 Hz), 63.08, 27.61, 18.89.

All data matched that reported in the literature<sup>1</sup>.

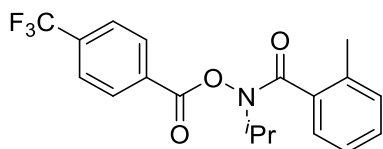

**1f**

**N-isopropyl-2-methyl-N-((4-(trifluoromethyl)benzoyl)oxy)benzamide (1f)**

28% overall yield, colorless oil.

$^1\text{H NMR}$  (400 MHz,  $\text{CDCl}_3$ )  $\delta$  8.13 (s, 2H), 7.72 (d,  $J = 8.1$  Hz, 2H), 7.42 – 7.09 (m, 4H), 4.44 (s, 1H), 2.49 (s, 3H), 1.29 (d,  $J = 6.8$  Hz, 6H).

$^{13}\text{C NMR}$  (101 MHz,  $\text{CDCl}_3$ )  $\delta$  163.34, 135.44 (q,  $J = 32.8$  Hz), 134.43, 130.74, 130.53, 130.43, 129.92, 126.44, 125.79 (q,  $J = 3.8$  Hz), 123.53 (d,  $J = 272.8$  Hz), 20.00, 19.21.

All data matched that reported in the literature<sup>1</sup>.

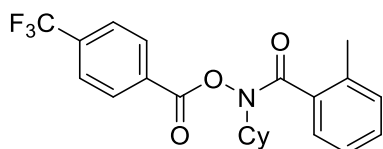

**1g**

**N-cyclohexyl-2-methyl-N-((4-(trifluoromethyl)benzoyl)oxy)benzamide (1g)**

45% overall yield, colorless oil.

$^1\text{H NMR}$  (400 MHz,  $\text{CDCl}_3$ )  $\delta$  8.08 (s, 2H), 7.70 (d,  $J = 8.1$  Hz, 2H), 7.33 (d,  $J = 7.5$  Hz, 1H), 7.27 – 7.12 (m, 3H), 4.73 – 3.49 (m, 1H), 2.48 (s, 3H), 2.11 – 1.92 (m, 2H), 1.79 (d,  $J = 12.8$  Hz, 2H), 1.59 (d,  $J = 13.2$  Hz, 2H), 1.34 – 1.15 (m, 2H), 1.13 – 0.95 (m, 1H).

$^{13}\text{C NMR}$  (101 MHz,  $\text{CDCl}_3$ )  $\delta$  163.36,  $\delta$  135.26 (q,  $J = 32.8$  Hz), 134.39, 132.70, 131.60, 130.52, 130.40, 130.26, 129.70, 129.44, 126.24, 125.67 (q,  $J = 3.7$  Hz), 123.40 (q,  $J = 272.9$  Hz), 30.32, 25.34, 25.02, 19.07.

All data matched that reported in the literature<sup>1</sup>.

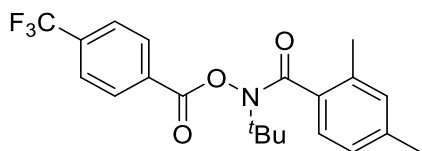

**1h**

**N-(tert-butyl)-2,4-dimethyl-N-((4-(trifluoromethyl)benzoyl)oxy)benzamide (1h)**

30% overall yield, white solid.

$^1\text{H NMR}$  (400 MHz,  $\text{CDCl}_3$ )  $\delta$  7.78 (d,  $J = 8.3$  Hz, 2H), 7.61 (d,  $J = 8.4$  Hz, 2H),

7.11 (d,  $J = 7.8$  Hz, 1H), 6.89 (s, 1H), 6.82 (d,  $J = 7.8$  Hz, 1H), 2.38 (s, 3H), 2.16 (s, 3H), 1.60 (s, 9H).

$^{13}\text{C}$  NMR (101 MHz,  $\text{CDCl}_3$ )  $\delta$  171.76, 164.31, 138.86, 135.17 (q,  $J = 32.7$  Hz), 133.25, 130.81, 130.24, 129.84, 125.86, 125.77, 125.56 (q,  $J = 3.9$  Hz), 123.33 (q,  $J = 272.9$  Hz), 63.03, 27.70, 21.10, 18.89.

All data matched that reported in the literature<sup>2</sup>.

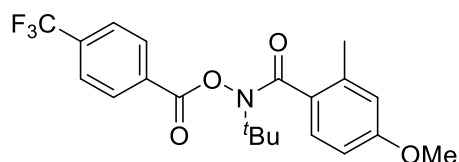

1i

**N-(tert-butyl)-4-methoxy-2-methyl-N-((4-(trifluoromethyl)benzoyl)oxy)benzamide (1i)**

30% overall yield, colorless oil.

$^1\text{H}$  NMR (400 MHz,  $\text{CDCl}_3$ )  $\delta$  7.85 (d,  $J = 8.3$  Hz, 2H), 7.64 (d,  $J = 8.4$  Hz, 2H), 7.20 (d,  $J = 8.4$  Hz, 1H), 6.62 (d,  $J = 2.7$  Hz, 1H), 6.56 (dd,  $J = 8.4, 2.7$  Hz, 1H), 3.68 (s, 3H), 2.42 (s, 3H), 1.60 (s, 9H).

$^{13}\text{C}$  NMR (101 MHz,  $\text{CDCl}_3$ )  $\delta$  171.59, 164.40, 159.99, 135.32 (q,  $J = 33.0$  Hz), 130.29, 129.97, 128.69, 127.81, 125.73 (q,  $J = 3.9$  Hz), 123.42 (q,  $J = 272.9$  Hz), 115.66, 110.48, 63.10, 55.18, 27.85, 19.41.

All data matched that reported in the literature<sup>2</sup>.

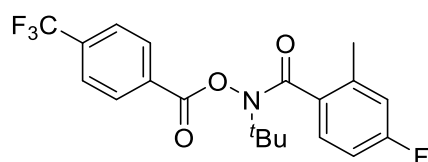

1j

**N-(tert-butyl)-4-fluoro-2-methyl-N-((4-(trifluoromethyl)benzoyl)oxy)benzamide (1j)**

25% overall yield, colorless oil.

$^1\text{H}$  NMR (400 MHz, Chloroform-*d*)  $\delta$  7.82 (d,  $J = 8.1$  Hz, 2H), 7.64 (d,  $J = 8.3$  Hz, 2H), 7.21 (dd,  $J = 8.4, 5.8$  Hz, 1H), 6.79 (dd,  $J = 9.7, 2.3$  Hz, 1H), 6.73 (td,  $J = 8.4, 2.3$  Hz, 1H), 2.42 (s, 3H), 1.60 (s, 9H).

$^{13}\text{C}$  NMR (101 MHz,  $\text{CDCl}_3$ )  $\delta$  170.54, 164.16, 162.60 (q,  $J = 248.3$  Hz), 137.8, 135.31 (q,  $J = 33.0$  Hz), 132.10, 129.80, 127.91 (q,  $J = 8.8$  Hz), 125.74 (q,  $J = 3.7$  Hz), 124.61, 123.26 (d,  $J = 272.9$  Hz), 121.90, 116.92 (q,  $J = 21.4$  Hz), 112.15 (q,  $J = 21.7$  Hz), 63.24, 27.63, 19.06.

All data matched that reported in the literature<sup>2</sup>.

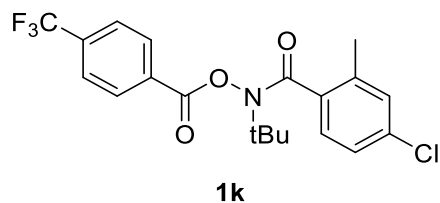

**N-(tert-butyl)-4-chloro-2-methyl-N-((4-(trifluoromethyl)benzoyl)oxy)benzamide (1k)**

14% overall yield, colorless oil.

$^1\text{H NMR}$  (400 MHz,  $\text{CDCl}_3$ )  $\delta$  7.82 (d,  $J = 8.1$  Hz, 2H), 7.65 (d,  $J = 8.3$  Hz, 2H), 7.17 (d,  $J = 8.2$  Hz, 1H), 7.09 (s, 1H), 7.02 (dd,  $J = 8.2, 1.5$  Hz, 1H), 2.40 (s, 3H), 1.60 (s, 9H).

$^{13}\text{C NMR}$  (101 MHz,  $\text{CDCl}_3$ )  $\delta$  170.34, 164.16, 136.85, 135.52 (q,  $J = 33.0$  Hz), 134.71, 134.47, 130.12, 129.84, 129.77, 127.29, 125.78 (q,  $J = 3.7$  Hz), 125.36, 123.26 (q,  $J = 273.0$  Hz), 63.33, 27.62, 18.84.

All data matched that reported in the literature<sup>2</sup>.

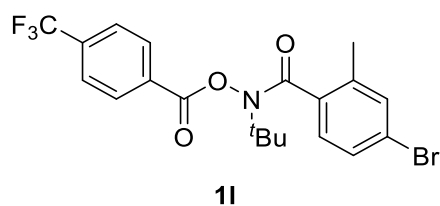

**4-bromo-N-(tert-butyl)-2-methyl-N-((4-(trifluoromethyl)benzoyl)oxy)benzamide (1l)**

10% overall yield, colorless oil.

$^1\text{H NMR}$  (400 MHz,  $\text{CDCl}_3$ )  $\delta$  7.82 (d,  $J = 8.3$  Hz, 2H), 7.65 (d,  $J = 8.4$  Hz, 2H), 7.26 (d,  $J = 2.1$  Hz, 1H), 7.18 (dd,  $J = 8.2, 2.1$  Hz, 1H), 7.10 (d,  $J = 8.2$  Hz, 1H), 2.40 (s, 3H), 1.60 (s, 9H).

$^{13}\text{C NMR}$  (101 MHz,  $\text{CDCl}_3$ )  $\delta$  170.46, 164.28, 137.18, 135.64 (q,  $J = 33.0$  Hz), 135.06, 133.14, 129.96, 129.87, 128.40, 127.57, 125.90 (q,  $J = 3.9$  Hz), 123.37 (q,  $J = 273.1$  Hz), 123.13, 63.46, 27.73, 18.89.

**HRMS** (ESI) ( $m/z$ ): Calcd.  $\text{C}_{20}\text{H}_{20}\text{BrF}_3\text{NO}_3^+$   $[\text{M}+\text{H}]^+$  : 458.0500. Found: 458.0573

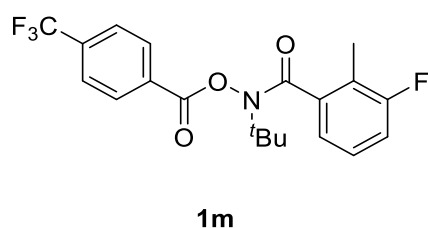

**N-(tert-butyl)-3-fluoro-2-methyl-N-((4-**



**(trifluoromethyl)benzoyloxy)benzamide (1m)**

32% overall yield, colorless oil.

<sup>1</sup>H NMR (400 MHz, CDCl<sub>3</sub>) δ 7.79 (d, *J* = 8.1 Hz, 2H), 7.63 (d, *J* = 8.2 Hz, 2H), 7.01 (q, *J* = 3.3 Hz, 2H), 6.85 (ddt, *J* = 9.5, 5.9, 3.7 Hz, 1H), 2.32 (d, *J* = 2.1 Hz, 3H), 1.61 (s, 9H)

<sup>13</sup>C NMR (101 MHz, CDCl<sub>3</sub>) δ 169.87, 164.13, 160.82 (q, *J* = 245.5 Hz), 138.23, 135.45 (q, *J* = 32.9 Hz), 129.80, 127.32, 126.73 (q, *J* = 6.8 Hz), 125.70 (q, *J* = 3.7 Hz), 123.25 (q, *J* = 272.9 Hz), 121.47, 121.44, 115.67 (q, *J* = 22.7 Hz), 63.37, 27.57, 11.16.

HRMS (ESI) (*m/z*): Calcd. C<sub>20</sub>H<sub>20</sub>F<sub>4</sub>NO<sub>3</sub><sup>+</sup> [M+H]<sup>+</sup> : 398.1301. Found: 398.1373.

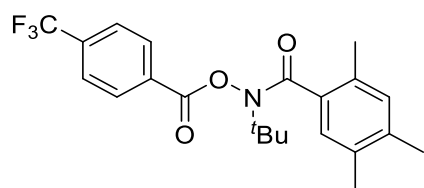

**1m**

**N-(tert-butyl)-2,4,5-trimethyl-N-((4-(trifluoromethyl)benzoyloxy)benzamide (1n)**

18% overall yield, colorless oil.

<sup>1</sup>H NMR (400 MHz, CDCl<sub>3</sub>) δ 7.78 (d, *J* = 8.0 Hz, 2H), 7.59 (d, *J* = 8.3 Hz, 2H), 6.99 (s, 1H), 6.83 (s, 1H), 2.35 (s, 3H), 2.06 (d, *J* = 8.2 Hz, 6H), 1.60 (s, 9H).

<sup>13</sup>C NMR (101 MHz, CDCl<sub>3</sub>) δ 171.80, 164.31, 137.43, 135.09 (q, *J* = 32.8 Hz), 133.50, 133.19, 131.34, 130.33, 129.82, 127.05, 125.47 (q, *J* = 3.7 Hz), 123.33 (q, *J* = 272.9 Hz), 119.26, 62.96, 27.68, 19.32, 18.83, 18.37.

HRMS (ESI) (*m/z*): Calcd. C<sub>22</sub>H<sub>25</sub>F<sub>3</sub>NO<sub>3</sub><sup>+</sup> [M+H]<sup>+</sup> : 408.1708. Found: 408.1782.

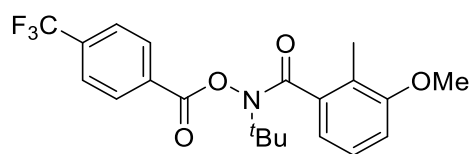

**1o**

**N-(tert-butyl)-3-methoxy-2-methyl-N-((4-(trifluoromethyl)benzoyloxy)benzamide (1o)**

15% overall yield, colorless oil.

<sup>1</sup>H NMR (400 MHz, CDCl<sub>3</sub>) δ 7.75 (d, *J* = 6.1 Hz, 2H), 7.59 (d, *J* = 8.1 Hz, 2H), 7.06 – 6.94 (m, 1H), 6.82 (d, *J* = 7.5 Hz, 1H), 6.65 (d, *J* = 8.1 Hz, 1H), 3.71 (s, 3H), 2.27 (s, 3H), 1.62 (s, 9H).

$^{13}\text{C}$  NMR (101 MHz,  $\text{CDCl}_3$ )  $\delta$  171.31, 164.23, 157.44, 135.12 (q,  $J = 32.9$  Hz), 130.19, 129.82, 127.39, 125.49 (q,  $J = 3.7$  Hz), 123.32 (d,  $J = 272.9$  Hz), 117.82, 110.51, 63.10, 55.42, 27.54, 12.39

HRMS (ESI) (m/z): Calcd.  $\text{C}_{21}\text{H}_{23}\text{F}_3\text{NO}_4^+$   $[\text{M}+\text{H}]^+$  : 410.1501. Found: 410.1573.

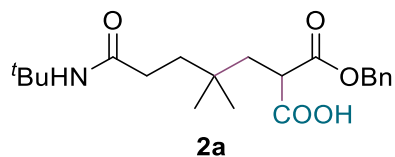

**2-((benzyloxy)carbonyl)-7-(tert-butylamino)-4,4-dimethyl-7-oxoheptanoic acid (2a)**

Yield : 82%, colorless oil.

$^1\text{H}$  NMR (400 MHz,  $\text{CDCl}_3$ )  $\delta$  7.40 – 7.29 (m, 5H), 5.48 (s, 1H), 5.17 (s, 2H), 3.49 (t,  $J = 6.1$  Hz, 1H), 2.06 (ddd,  $J = 14.3, 10.7, 7.2$  Hz, 2H), 2.00 – 1.88 (m, 2H), 1.60 – 1.44 (m, 2H), 1.33 (s, 9H), 0.84 (s, 6H).

$^{13}\text{C}$  NMR (101 MHz,  $\text{CDCl}_3$ )  $\delta$  173.91, 172.89, 170.38, 135.36, 128.55, 128.36, 128.31, 128.15, 67.29, 51.37, 48.18, 39.04, 37.27, 32.85, 32.59, 28.71, 26.76, 26.68.

HRMS (ESI) (m/z): Calcd.  $\text{C}_{21}\text{H}_{32}\text{NO}_5^+$   $[\text{M}+\text{H}]^+$  : 378.2202. Found: 378.2275.

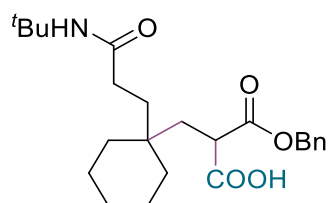

**3-(benzyloxy)-2-((1-(3-(tert-butylamino)-3-oxopropyl)cyclohexyl)methyl)-3-oxopropanoic acid (2b)**

Yield : 76%, colorless oil.

$^1\text{H}$  NMR (400 MHz,  $\text{CDCl}_3$ )  $\delta$  10.81 (s, 1H), 7.33 (q,  $J = 3.7, 3.3$  Hz, 5H), 5.69 (s, 1H), 5.16 (d,  $J = 4.2$  Hz, 2H), 3.44 (q,  $J = 7.9, 6.8$  Hz, 1H), 2.17 – 1.91 (m, 4H), 1.61 – 1.52 (m, 4H), 1.44 – 1.13 (m, 14H).

$^{13}\text{C}$  NMR (101 MHz,  $\text{CDCl}_3$ )  $\delta$  174.23, 173.15, 170.91, 135.42, 128.55, 128.29, 128.16, 67.19, 51.18, 47.53, 35.43, 35.13, 31.62, 28.71, 26.11, 21.30.

HRMS (ESI) (m/z): Calcd.  $\text{C}_{24}\text{H}_{36}\text{NO}_5^+$   $[\text{M}+\text{H}]^+$  : 418.2515 Found: 418.2588.

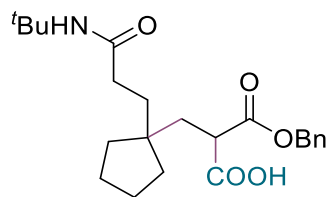

**2c**

**3-(benzyloxy)-2-((1-(3-(tert-butylamino)-3-oxopropyl)cyclopentyl)methyl)-3-oxopropanoic acid (2c)**

Yield : 81%, colorless oil.

$^1\text{H NMR}$  (400 MHz,  $\text{CDCl}_3$ )  $\delta$  10.33 (s, 1H), 7.36 – 7.31 (m, 6H), 5.66 (s, 1H), 5.21 – 5.12 (m, 2H), 3.45 (t,  $J = 5.9$  Hz, 1H), 2.15 – 1.97 (m, 4H), 1.58 (tt,  $J = 9.2, 4.0$  Hz, 4H), 1.40 – 1.20 (m, 15H).

$^{13}\text{C NMR}$  (101 MHz,  $\text{CDCl}_3$ )  $\delta$  174.08, 173.13, 170.56, 135.29, 128.58, 128.36, 128.14, 67.33, 51.30, 48.82, 45.00, 37.31, 37.26, 28.70, 24.05, 24.02.

**HRMS** (ESI) (m/z): Calcd.  $\text{C}_{23}\text{H}_{34}\text{NO}_5^+$   $[\text{M}+\text{H}]^+$  : 404.2359 Found: 404.2427.

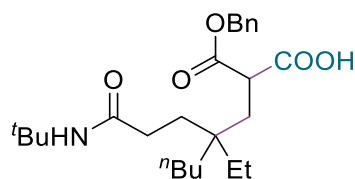

**2d**

**2-((benzyloxy)carbonyl)-4-(3-(tert-butylamino)-3-oxopropyl)-4-ethyloctanoic acid (2d)**

Yield : 79%, colorless oil.

$^1\text{H NMR}$  (400 MHz,  $\text{CDCl}_3$ )  $\delta$  9.88 (s, 1H), 7.36 – 7.30 (m, 5H), 5.65 (d,  $J = 4.7$  Hz, 1H), 5.23 – 5.11 (m, 2H), 3.45 (t,  $J = 5.9$  Hz, 1H), 2.08 – 1.80 (m, 4H), 1.48 – 1.37 (m, 2H), 1.32 (d,  $J = 4.2$  Hz, 9H), 1.22 – 1.02 (m, 8H), 0.91 – 0.65 (m, 6H).

$^{13}\text{C NMR}$  (101 MHz,  $\text{CDCl}_3$ )  $\delta$  173.97, 170.38, 135.24, 128.59, 128.39, 128.25, 128.16, 77.37, 77.05, 76.73, 67.40, 51.26, 47.39, 37.91, 37.74, 35.05, 34.12, 32.05, 31.82, 28.72, 28.03, 24.82, 23.41, 14.08, 7.32.

**HRMS** (ESI) (m/z): Calcd.  $\text{C}_{25}\text{H}_{40}\text{NO}_5^+$   $[\text{M}+\text{H}]^+$  : 434.2828 Found: 434.2894.

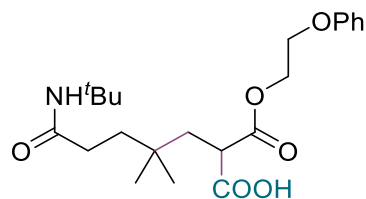

**2e**

**7-(tert-butylamino)-4,4-dimethyl-7-oxo-2-((2-phenoxyethoxy)carbonyl)heptanoic acid (2e)**

Yield : 66%, colorless oil.

$^1\text{H NMR}$  (400 MHz,  $\text{CDCl}_3$ )  $\delta$  9.32 (s, 1H), 7.27 (t,  $J = 6.3, 5.5, 2.6$  Hz, 2H), 6.95 (t,  $J = 7.3$  Hz, 1H), 6.89 (d,  $J = 8.1$  Hz, 2H), 5.59 (s, 1H), 4.54 – 4.41 (m, 2H), 4.18 (t,  $J = 4.9$  Hz, 2H), 3.46 (t,  $J = 7.2, 5.0$  Hz, 1H), 2.12 – 2.03 (m, 2H), 2.02 – 1.84 (m, 2H), 1.62 – 1.41 (m, 2H), 1.31 (s, 9H), 0.85 (d,  $J = 3.2$  Hz, 6H).

$^{13}\text{C NMR}$  (101 MHz,  $\text{CDCl}_3$ )  $\delta$  173.88, 172.63, 170.55, 158.38, 129.53, 129.47, 121.22, 114.69, 114.63, 65.51, 63.72, 51.37, 48.09, 39.06, 37.25, 32.85, 32.55, 28.76, 28.70, 26.72, 26.69, 19.47.

**HRMS** (ESI) (m/z): Calcd.  $\text{C}_{22}\text{H}_{34}\text{NO}_6^+$   $[\text{M}+\text{H}]^+$  : 408.2308 Found: 408.2393.

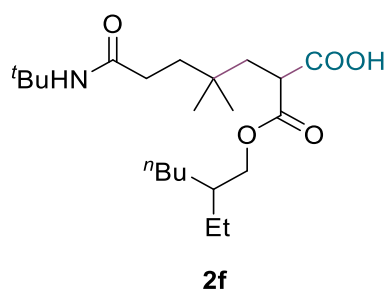

**7-(tert-butylamino)-2-(((2-ethylhexyl)oxy)carbonyl)-4,4-dimethyl-7-oxoheptanoic acid (2f)**

Yield : 71%, colorless oil.

$^1\text{H NMR}$  (400 MHz,  $\text{CDCl}_3$ )  $\delta$  10.57 (s, 1H), 5.60 (s, 1H), 4.12 – 4.00 (m, 2H), 3.42 (t,  $J = 6.1$  Hz, 1H), 2.16 – 2.05 (m, 2H), 2.01 – 1.84 (m, 2H), 1.65 – 1.46 (m, 3H), 1.43 – 1.22 (m, 19H), 0.93 – 0.85 (m, 12H).

$^{13}\text{C NMR}$  (101 MHz,  $\text{CDCl}_3$ )  $\delta$  173.76, 173.73, 170.58, 68.07, 68.05, 51.34, 48.13, 39.02, 38.61, 37.26, 32.83, 32.61, 30.25, 28.85, 28.82, 28.71, 26.74, 26.67, 23.68, 22.98, 22.94, 22.91, 14.04, 10.92, 10.90.

**HRMS** (ESI) (m/z): Calcd.  $\text{C}_{22}\text{H}_{42}\text{NO}_5^+$   $[\text{M}+\text{H}]^+$  : 400.2985 Found: 400.3057.

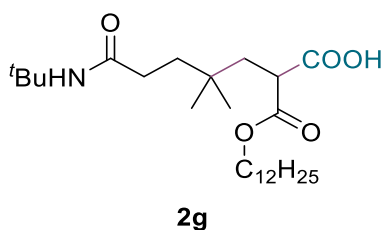

**7-(tert-butylamino)-2-((dodecyloxy)carbonyl)-4,4-dimethyl-7-oxoheptanoic acid (2g)**

Yield : 71%, colorless oil.

$^1\text{H NMR}$  (400 MHz,  $\text{CDCl}_3$ )  $\delta$  10.66 (s, 1H), 5.60 (s, 1H), 4.13 (t,  $J = 6.8$  Hz, 2H), 3.42 (t,  $J = 6.9, 5.3$  Hz, 1H), 2.18 – 2.05 (m, 2H), 1.93 (qd,  $J = 14.5, 6.1$  Hz,

2H), 1.64 (p,  $J = 7.0$  Hz, 2H), 1.55 – 1.44 (m, 2H), 1.30 (d,  $J = 30.3$  Hz, 28H), 0.88 (d,  $J = 2.8$  Hz, 9H).

$^{13}\text{C}$  NMR (101 MHz,  $\text{CDCl}_3$ )  $\delta$  173.81, 173.54, 170.52, 65.88, 51.36, 48.11, 39.04, 37.22, 32.85, 32.61, 31.92, 29.65, 29.64, 29.59, 29.51, 29.35, 29.20, 28.71, 28.38, 26.78, 26.70, 25.78, 22.69, 14.12.

HRMS (ESI) (m/z): Calcd.  $\text{C}_{26}\text{H}_{50}\text{NO}_5^+$   $[\text{M}+\text{H}]^+$  : 456.3611 Found: 456.3680.

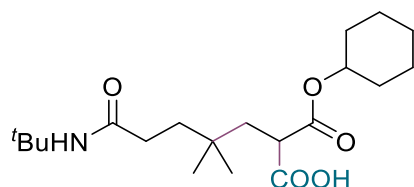

2h

### 7-(tert-butylamino)-2-((cyclohexyloxy)carbonyl)-4,4-dimethyl-7-oxoheptanoic acid (2)

Yield : 71%, colorless oil.

$^1\text{H}$  NMR (400 MHz,  $\text{CDCl}_3$ )  $\delta$  10.25 (s, 1H), 5.61 (s, 1H), 4.82 (tt,  $J = 8.7, 3.8$  Hz, 1H), 3.39 (dd,  $J = 7.0, 5.2$  Hz, 1H), 2.09 (q,  $J = 7.6, 6.7$  Hz, 2H), 1.97 (dd,  $J = 14.4, 7.2$  Hz, 1H), 1.92 – 1.78 (m, 5H), 1.77 – 1.66 (m, 4H), 1.61 – 1.39 (m, 8H), 1.34 (d,  $J = 4.0$  Hz, 14H).

$^{13}\text{C}$  NMR (101 MHz,  $\text{CDCl}_3$ )  $\delta$  173.76, 173.74, 169.92, 73.94, 51.30, 48.42, 38.98, 37.21, 32.87, 32.64, 31.24, 31.19, 28.71, 26.81, 25.30, 23.55, 23.52.

HRMS (ESI) (m/z): Calcd.  $\text{C}_{20}\text{H}_{36}\text{NO}_5^+$   $[\text{M}+\text{H}]^+$  : 370.2515 Found: 370.2585.

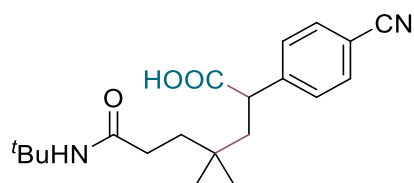

2i

### 7-(tert-butylamino)-2-(4-cyanophenyl)-4,4-dimethyl-7-oxoheptanoic acid (2i)

Yield : 71%, colorless oil.

$^1\text{H}$  NMR (400 MHz,  $\text{CDCl}_3$ )  $\delta$  7.63 – 7.57 (m, 2H), 7.49 – 7.43 (m, 2H), 5.42 (s, 1H), 3.75 (dd,  $J = 8.2, 4.4$  Hz, 1H), 2.29 (dd,  $J = 14.2, 8.2$  Hz, 1H), 2.13 – 1.94 (m, 2H), 1.62 – 1.45 (m, 3H), 1.31 (s, 9H), 0.83 (d,  $J = 3.1$  Hz, 6H).

$^{13}\text{C}$  NMR (101 MHz,  $\text{CDCl}_3$ )  $\delta$  177.08, 173.58, 146.48, 132.36, 128.91, 118.72, 110.89, 51.40, 48.07, 44.62, 37.22, 33.42, 32.63, 28.69, 27.16, 26.94.

HRMS (ESI) (m/z): Calcd.  $\text{C}_{20}\text{H}_{36}\text{NO}_5^+$   $[\text{M}+\text{H}]^+$  : 370.2515 Found: 370.2585.

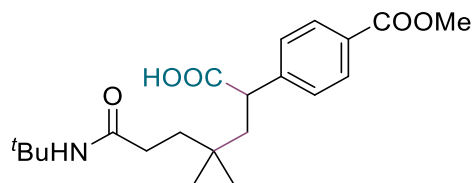

**2j**

**7-(tert-butylamino)-2-(4-(methoxycarbonyl)phenyl)-4,4-dimethyl-7-oxoheptanoic acid (2j)**

Yield : 75%, colorless oil.

$^1\text{H NMR}$  (400 MHz,  $\text{CDCl}_3$ )  $\delta$  7.97 (d,  $J = 8.2$  Hz, 2H), 7.45 – 7.39 (m, 2H), 5.51 (s, 1H), 3.90 (d,  $J = 1.8$  Hz, 4H), 3.74 (dd,  $J = 8.3, 4.4$  Hz, 1H), 2.29 (dd,  $J = 14.3, 8.3$  Hz, 1H), 2.14 – 1.96 (m, 1H), 1.62 – 1.41 (m, 3H), 1.30 (s, 9H), 0.85 (d,  $J = 4.5$  Hz, 6H).

$^{13}\text{C NMR}$  (101 MHz,  $\text{CDCl}_3$ )  $\delta$  178.09, 176.68, 174.01, 166.89, 166.76, 145.63, 142.89, 130.16, 129.99, 129.51, 129.10, 128.14, 128.04, 52.20, 52.15, 51.53, 47.65, 46.41, 46.09, 44.39, 37.46, 33.44, 32.70, 29.94, 28.66, 27.06, 26.91.

**HRMS** (ESI) (m/z): Calcd.  $\text{C}_{21}\text{H}_{32}\text{NO}_5^+$   $[\text{M}+\text{H}]^+$  : 377.2202 Found: 378.2274.

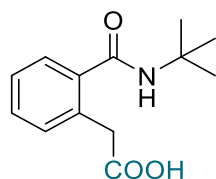

**3a**

**2-(2-(tert-butylcarbamoyl)phenyl)acetic acid (3a)**

75% overall yield, colorless liquid.

$^1\text{H NMR}$  (400 MHz,  $\text{CDCl}_3$ )  $\delta$  7.45 (d,  $J = 4.9$  Hz, 3H), 7.33 (td,  $J = 7.9, 6.6, 3.9$  Hz, 1H), 6.14 (s, 1H), 3.72 (s, 2H), 1.50 (s, 9H).

$^{13}\text{C NMR}$  (101 MHz,  $\text{CDCl}_3$ )  $\delta$  172.51, 171.10, 163.16, 135.55, 132.97, 131.54, 131.37, 127.74, 127.62, 52.96, 41.68, 36.80, 31.69, 28.54.

All data matched that reported in the literature<sup>3</sup>.

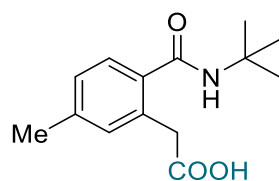

**3b**

**2-(2-(tert-butylcarbamoyl)-5-methylphenyl)acetic acid (3b)**

67% overall yield, colorless liquid.

$^1\text{H NMR}$  (400 MHz,  $\text{CDCl}_3$ )  $\delta$  7.33 (d,  $J = 7.8$  Hz, 1H), 7.12 (d,  $J = 7.8$  Hz, 1H), 6.11 (s, 1H), 3.68 (s, 2H), 2.35 (s, 3H), 1.49 (s, 9H).

$^{13}\text{C NMR}$  (101 MHz,  $\text{CDCl}_3$ )  $\delta$  171.79, 171.29, 142.24, 133.45, 132.53, 132.31, 128.44, 127.34, 52.98, 42.15, 28.82, 28.62, 21.20.

All data matched that reported in the literature<sup>3</sup>.

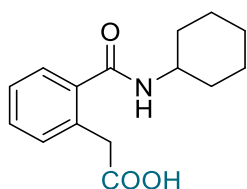

**3c**

### 2-(2-(cyclohexylcarbamoyl)phenyl)acetic acid (3c)

82% overall yield, colorless liquid.

$^1\text{H NMR}$  (400 MHz,  $\text{CDCl}_3$ )  $\delta$  7.51 – 7.43 (m, 1H), 7.39 (ddd,  $J = 16.0, 7.6, 1.5$  Hz, 2H), 7.32 – 7.26 (m, 1H), 6.70 (d,  $J = 8.1$  Hz, 1H), 3.94 (th,  $J = 13.9, 3.7$  Hz, 1H), 3.69 (s, 2H), 2.02 (dq,  $J = 11.9, 3.6$  Hz, 2H), 1.78 (dp,  $J = 11.1, 3.7$  Hz, 2H), 1.67 (dt,  $J = 12.9, 3.7$  Hz, 1H), 1.48 – 1.12 (m, 7H).

$^{13}\text{C NMR}$  (101 MHz,  $\text{CDCl}_3$ )  $\delta$  172.02, 170.44, 134.49, 133.36, 131.63, 127.81, 127.72, 77.40, 77.08, 76.76, 49.86, 42.04, 32.65, 25.34, 24.84.

**HRMS** (ESI) (m/z): Calcd.  $\text{C}_{15}\text{H}_{20}\text{NO}_3^+$   $[\text{M}+\text{H}]^+$  : 262.1365. Found: 262.1438.

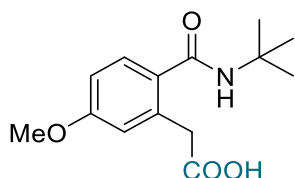

**3d**

### 2-(2-(tert-butylcarbamoyl)-5-methoxyphenyl)acetic acid (3d)

64% overall yield, colorless liquid.

$^1\text{H NMR}$  (400 MHz,  $\text{CDCl}_3$ )  $\delta$  7.38 (d,  $J = 8.6$  Hz, 1H), 6.94 (d,  $J = 2.5$  Hz, 1H), 6.81 (dd,  $J = 8.6, 2.6$  Hz, 1H), 6.06 (s, 1H), 3.82 (s, 3H), 3.71 (s, 2H), 1.49 (s, 9H).

$^{13}\text{C NMR}$  (101 MHz,  $\text{CDCl}_3$ )  $\delta$  171.62, 171.01, 161.86, 135.79, 129.05, 127.36, 116.43, 113.79, 55.57, 52.94, 42.49, 28.64.

All data matched that reported in the literature<sup>3</sup>.

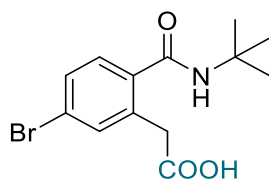

**3e**

**2-(5-bromo-2-(tert-butylcarbamoyl)phenyl)acetic acid (3e)**

57% overall yield, colorless liquid.

$^1\text{H NMR}$  (400 MHz,  $\text{CDCl}_3$ )  $\delta$  7.45 (d,  $J = 5.6$  Hz, 2H), 7.36 – 7.28 (m, 1H), 6.15 (s, 1H), 3.72 (s, 2H), 1.50 (s, 9H).

$^{13}\text{C NMR}$  (101 MHz,  $\text{CDCl}_3$ )  $\delta$  171.60, 171.21, 135.26, 133.43, 131.84, 131.67, 127.85, 127.28, 53.11, 42.11, 28.60..

All data matched that reported in the literature<sup>3</sup>.

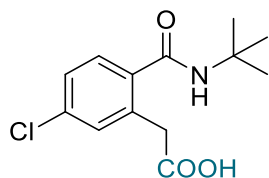

**3f**

**2-(2-(tert-butylcarbamoyl)-5-chlorophenyl)acetic acid (3f)**

64% overall yield, colorless liquid.

$^1\text{H NMR}$  (400 MHz,  $\text{CDCl}_3$ )  $\delta$  7.44 – 7.33 (m, 2H), 7.29 (dd,  $J = 8.3, 2.0$  Hz, 1H), 6.28 (s, 1H), 3.70 (s, 2H), 1.48 (s, 9H).

$^{13}\text{C NMR}$  (101 MHz,  $\text{CDCl}_3$ )  $\delta$  171.20, 170.09, 137.57, 135.12, 133.78, 131.75, 130.53, 128.70, 128.00, 125.49, 53.25, 41.64, 28.57.

All data matched that reported in the literature<sup>3</sup>.

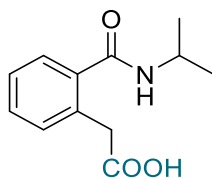

**3g**

**2-(2-(isopropylcarbamoyl)phenyl)acetic acid (3g)**

64% overall yield, colorless liquid.



**<sup>1</sup>H NMR** (400 MHz, CDCl<sub>3</sub>) δ 7.50 – 7.40 (m, 3H), 7.36 – 7.29 (m, 1H), 6.29 (s, 1H), 4.28 (dt, *J* = 13.3, 6.7 Hz, 1H), 3.72 (s, 2H), 1.31 (d, *J* = 6.5 Hz, 6H).

**<sup>13</sup>C NMR** (101 MHz, CDCl<sub>3</sub>) δ 171.55, 170.59, 134.27, 133.62, 131.89, 131.87, 127.89, 127.41, 43.07, 42.20, 22.46.

**HRMS** (ESI) (*m/z*): Calcd. C<sub>12</sub>H<sub>16</sub>NO<sub>3</sub><sup>+</sup> [*M*+*H*]<sup>+</sup> : 222.1052. Found: 222.1124.

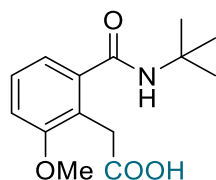

**3h**

### 2-(2-(tert-butylcarbamoyl)-6-methoxyphenyl)acetic acid (3h)

57% overall yield, colorless liquid.

**<sup>1</sup>H NMR** (400 MHz, CDCl<sub>3</sub>) δ 7.30 (d, *J* = 8.0 Hz, 1H), 7.04 – 6.94 (m, 2H), 6.08 (s, 1H), 3.88 (s, 3H), 3.75 (s, 2H), 1.49 (s, 9H).

**<sup>13</sup>C NMR** (101 MHz, CDCl<sub>3</sub>) δ 171.09, 170.86, 158.70, 137.36, 128.80, 121.93, 118.61, 113.18, 56.09, 52.96, 35.21, 28.62.

**HRMS** (ESI) (*m/z*): Calcd. C<sub>14</sub>H<sub>20</sub>NO<sub>4</sub><sup>+</sup> [*M*+*H*]<sup>+</sup> : 266.1314. Found: 266.1386.

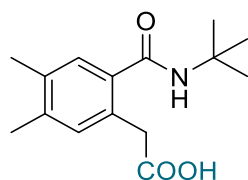

**3i**

### 2-(2-(tert-butylcarbamoyl)-4,5-dimethylphenyl)acetic acid (3i)

60% overall yield, colorless liquid.

**<sup>1</sup>H NMR** (400 MHz, CDCl<sub>3</sub>) δ 7.21 (s, 1H), 7.17 (s, 1H), 3.65 (s, 2H), 2.26 (d, *J* = 3.5 Hz, 6H), 1.49 (s, 9H).

**<sup>13</sup>C NMR** (101 MHz, CDCl<sub>3</sub>) δ 172.13, 171.36, 140.94, 136.41, 133.08, 132.47, 130.89, 130.56, 128.24, 125.55, 52.94, 41.74, 28.65, 19.57, 19.35.

**HRMS** (ESI) (*m/z*): Calcd. C<sub>15</sub>H<sub>22</sub>NO<sub>3</sub><sup>+</sup> [*M*+*H*]<sup>+</sup> : 264.1521. Found: 264.1596.

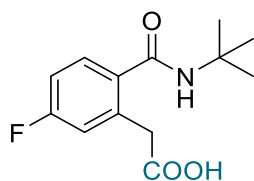

3j

### 2-(2-(tert-butylcarbamoyl)-5-fluorophenyl)acetic acid (3j)

61% overall yield, colorless liquid.

$^1\text{H NMR}$  (400 MHz,  $\text{CDCl}_3$ )  $\delta$  7.46 (dd,  $J = 8.6, 5.5$  Hz, 1H), 7.12 (dd,  $J = 9.1, 2.5$  Hz, 1H), 7.00 (td,  $J = 8.2, 2.6$  Hz, 1H), 6.22 (s, 1H), 3.70 (s, 2H), 1.49 (s, 9H).

$^{13}\text{C NMR}$  (101 MHz,  $\text{CDCl}_3$ )  $\delta$  170.93, 170.22, 163.92 (d,  $J = 253.5$  Hz), 136.39, 136.31, 131.58, 131.54, 129.67, 129.58, 118.82, 118.60, 114.98, 114.76, 53.21, 42.00, 28.57.

**HRMS** (ESI) ( $m/z$ ): Calcd.  $\text{C}_{13}\text{H}_{17}\text{FNO}_3^+$   $[\text{M}+\text{H}]^+$  : 254.1114. Found: 254.1186.

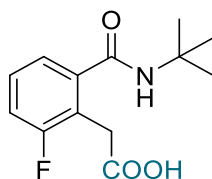

3j

### 2-(2-(tert-butylcarbamoyl)-6-fluorophenyl)acetic acid (3k)

58% overall yield, colorless liquid.

$^1\text{H NMR}$  (400 MHz,  $\text{CDCl}_3$ )  $\delta$  7.36 – 7.28 (m, 1H), 7.28 – 7.15 (m, 2H), 6.19 (s, 1H), 3.79 (s, 2H), 1.49 (s, 9H).

$^{13}\text{C NMR}$  (101 MHz,  $\text{CDCl}_3$ )  $\delta$  170.67, 169.56, 161.55 (d,  $J = 250.5$  Hz), 137.98, 129.35, 129.26, 122.83, 122.79, 120.78 (d,  $J = 17.5$  Hz), 118.30 (d,  $J = 22.8$  Hz), 53.12, 33.98, 33.95, 28.58.

**HRMS** (ESI) ( $m/z$ ): Calcd.  $\text{C}_{13}\text{H}_{17}\text{FNO}_3^+$   $[\text{M}+\text{H}]^+$  : 254.1114. Found: 254.1186.

# 8. NMR Spectra of New Compounds and Products

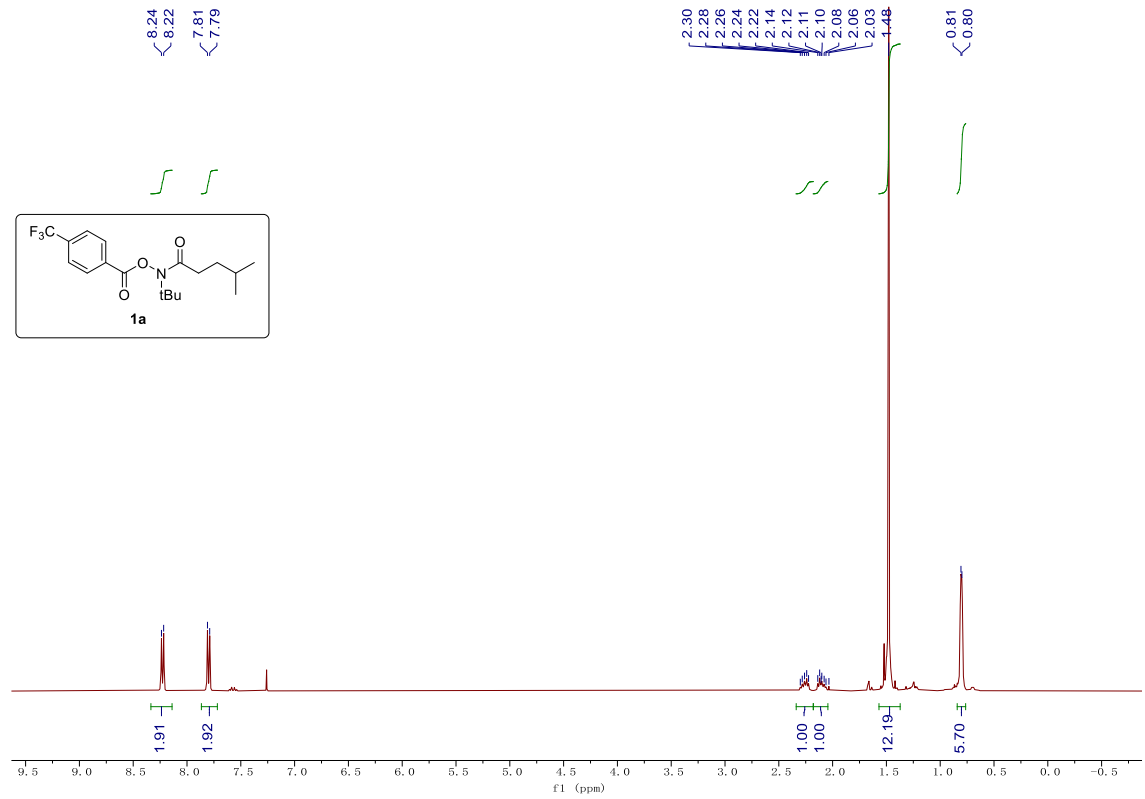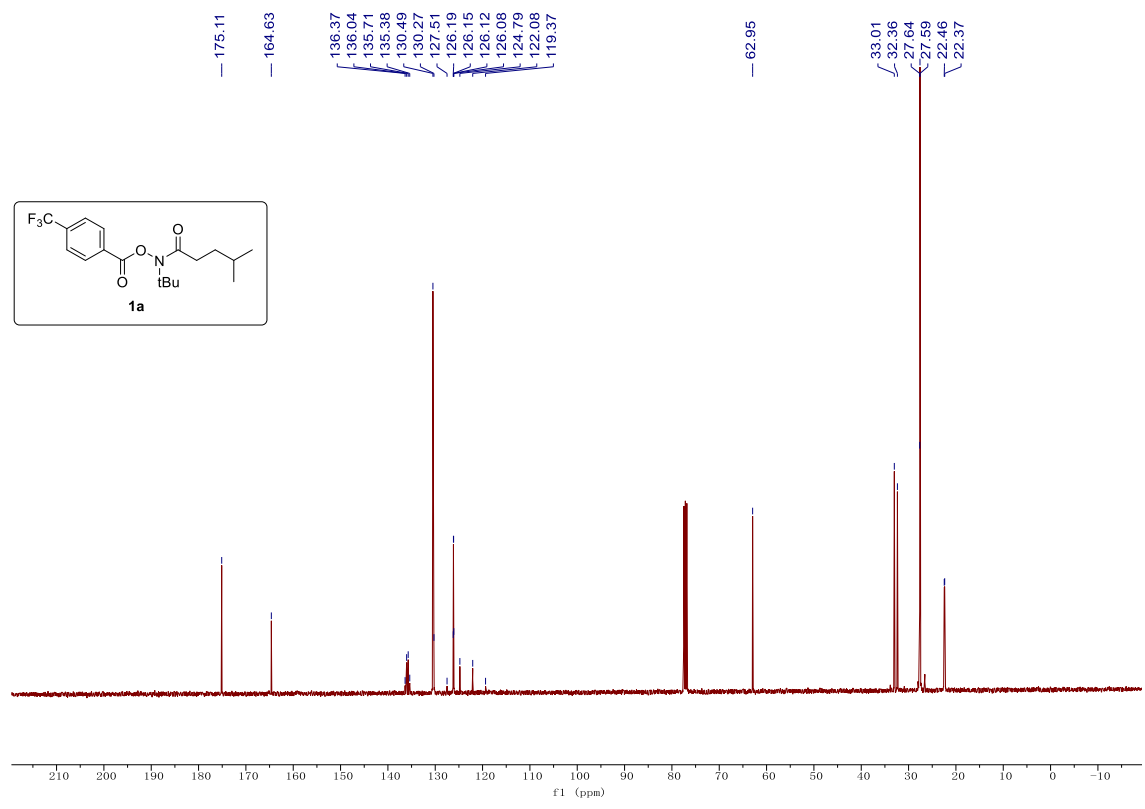

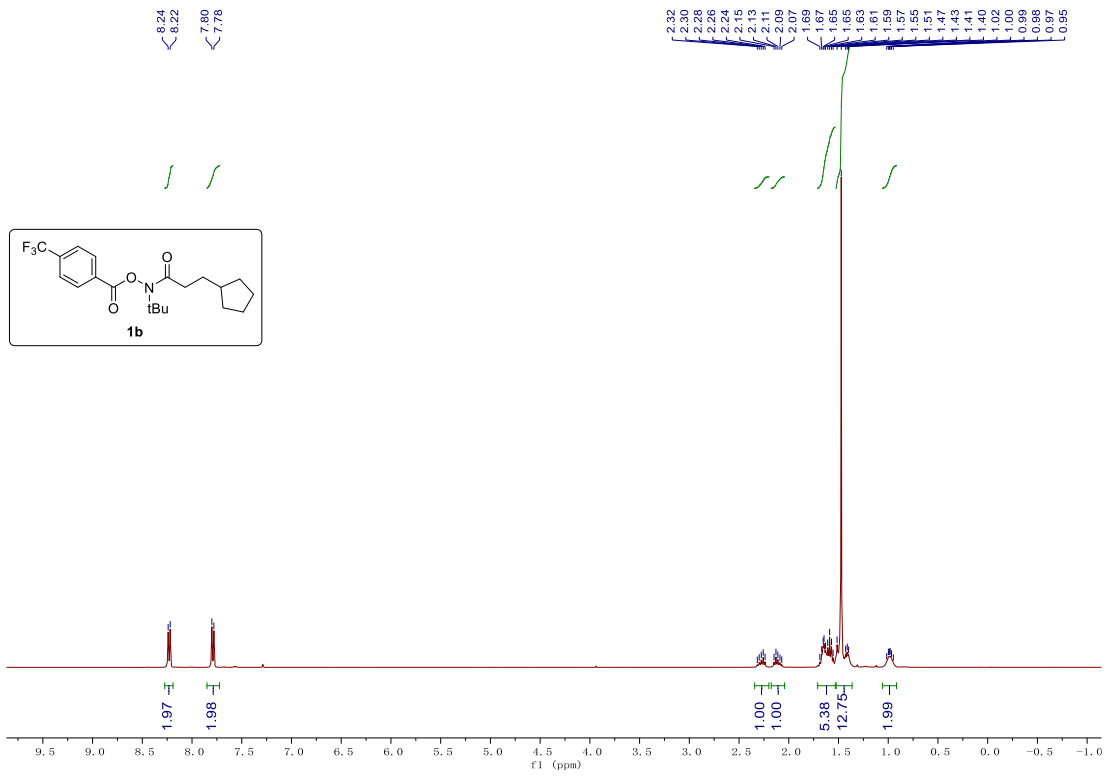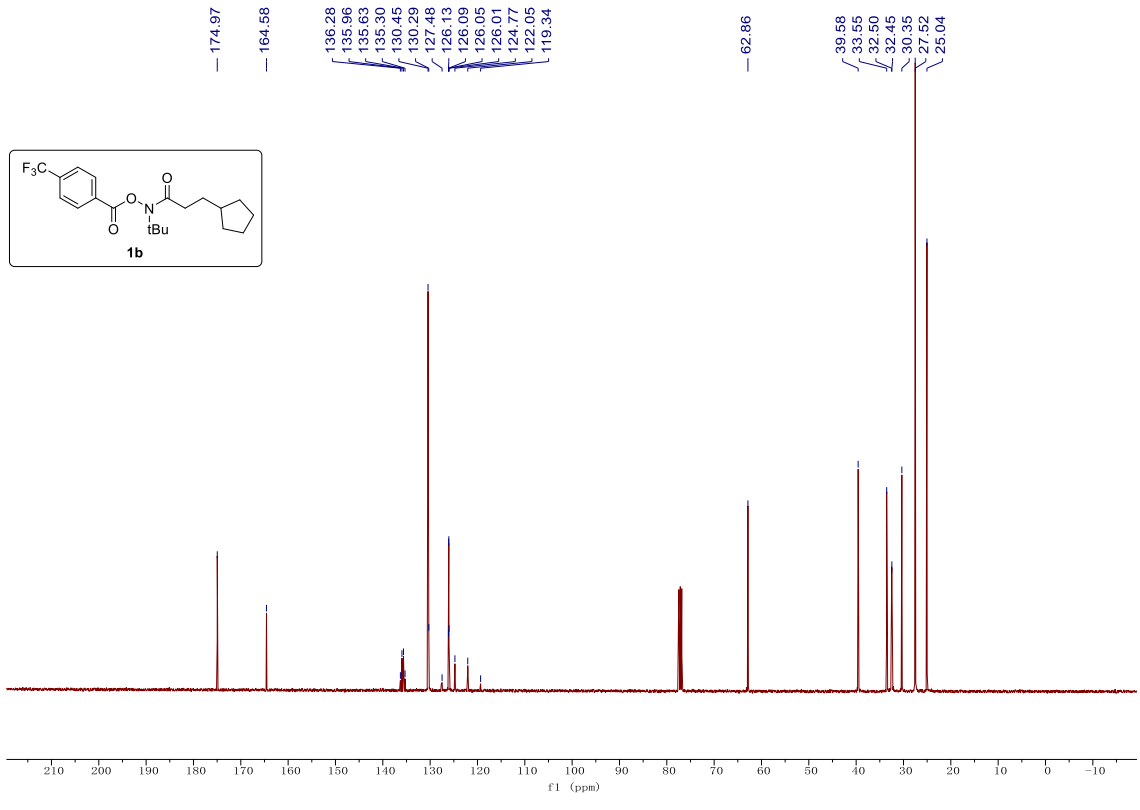



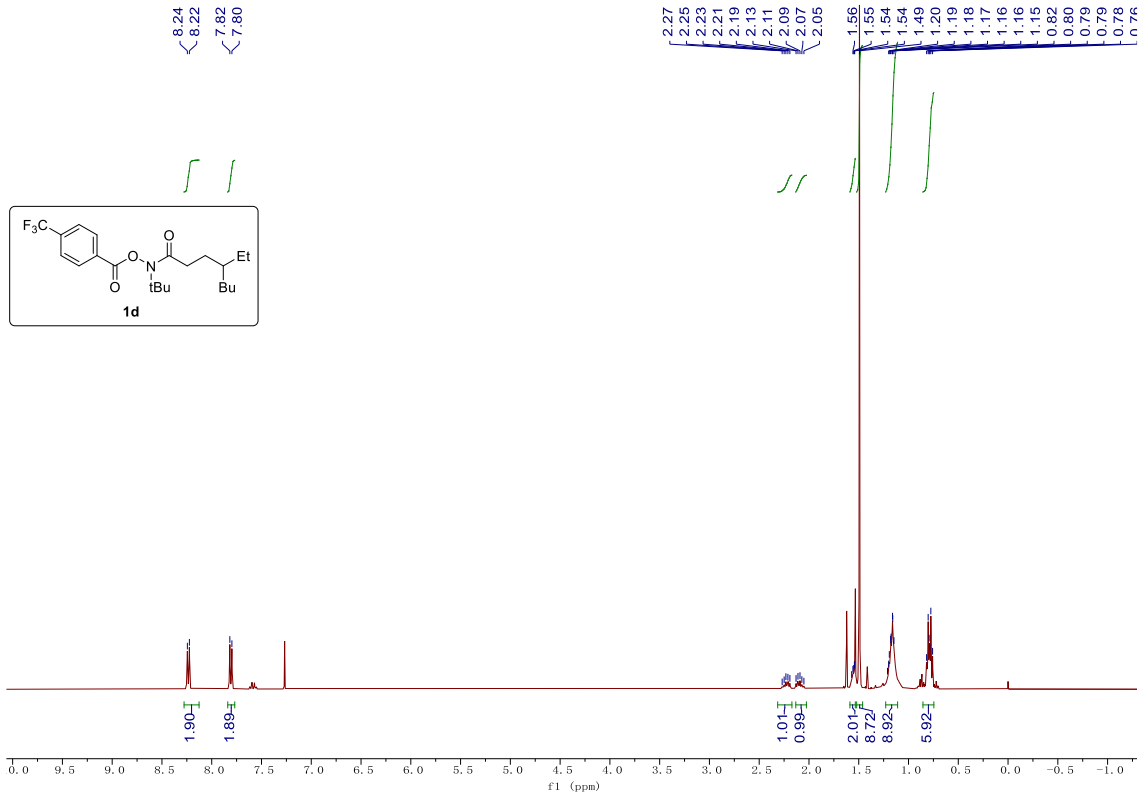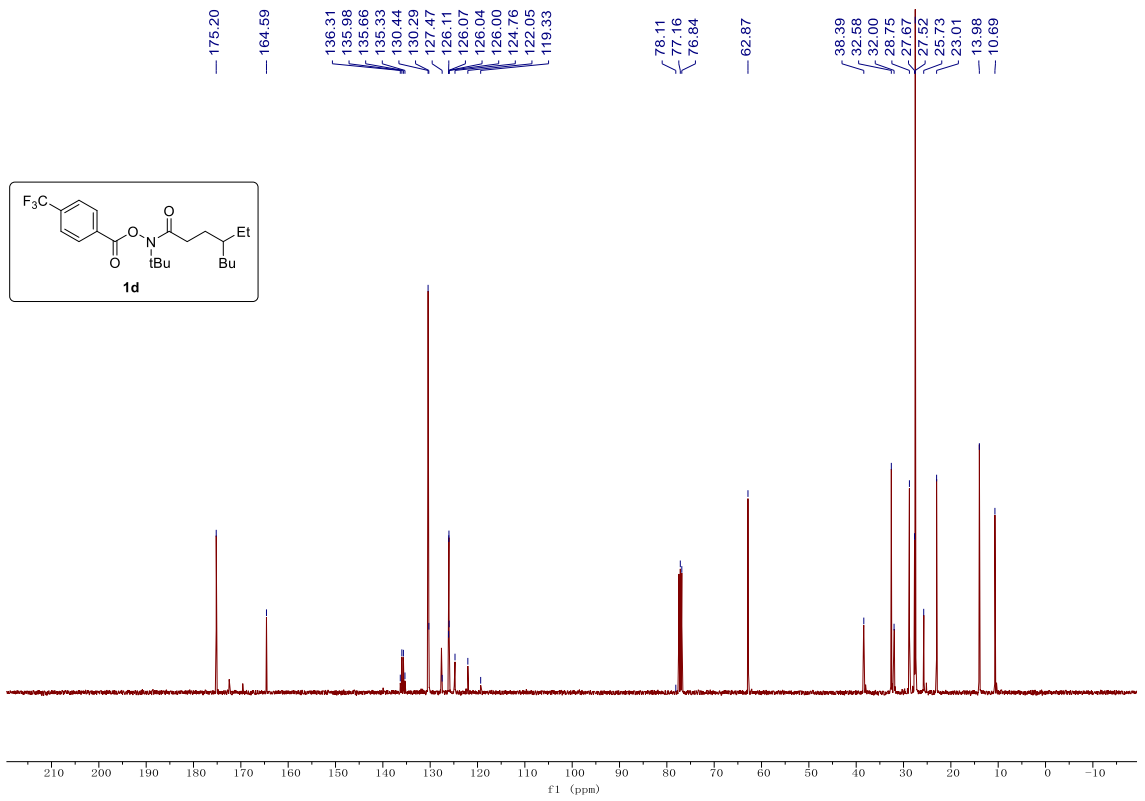

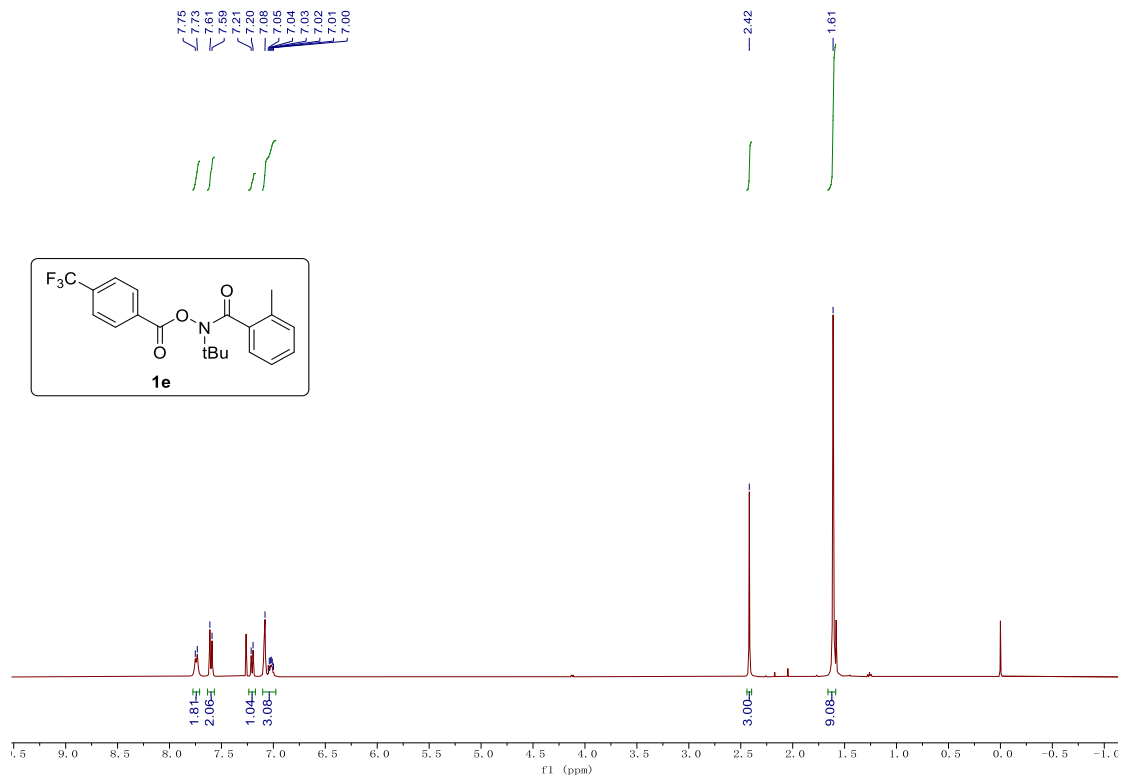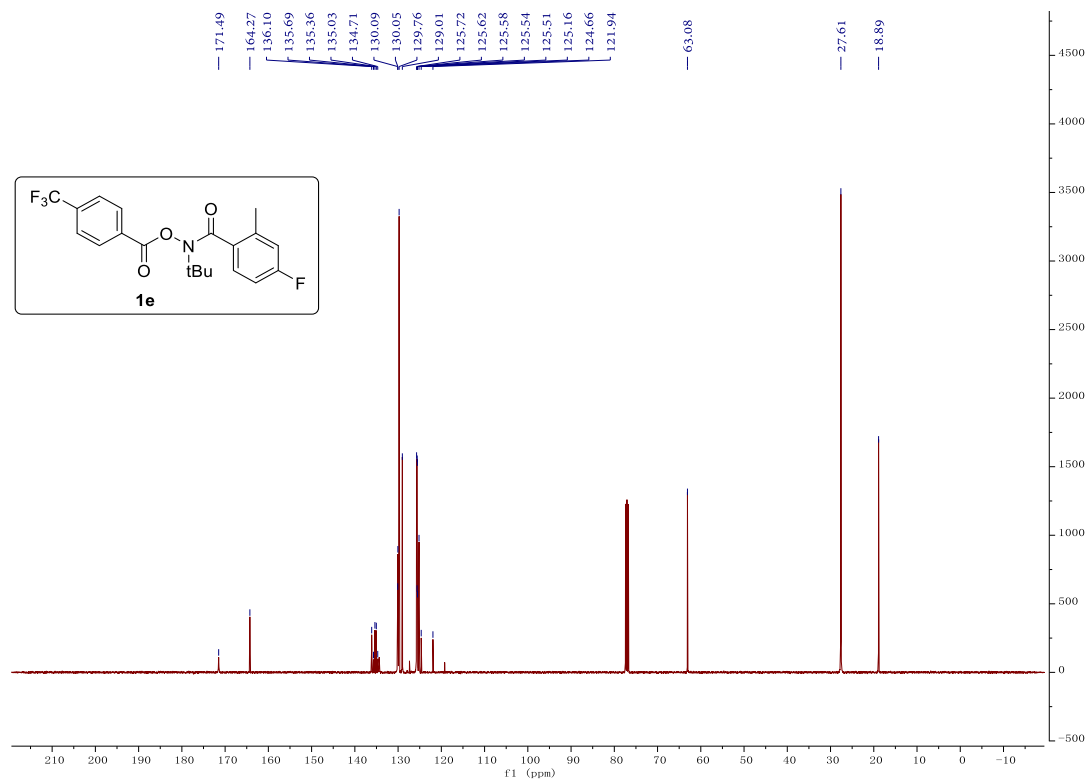

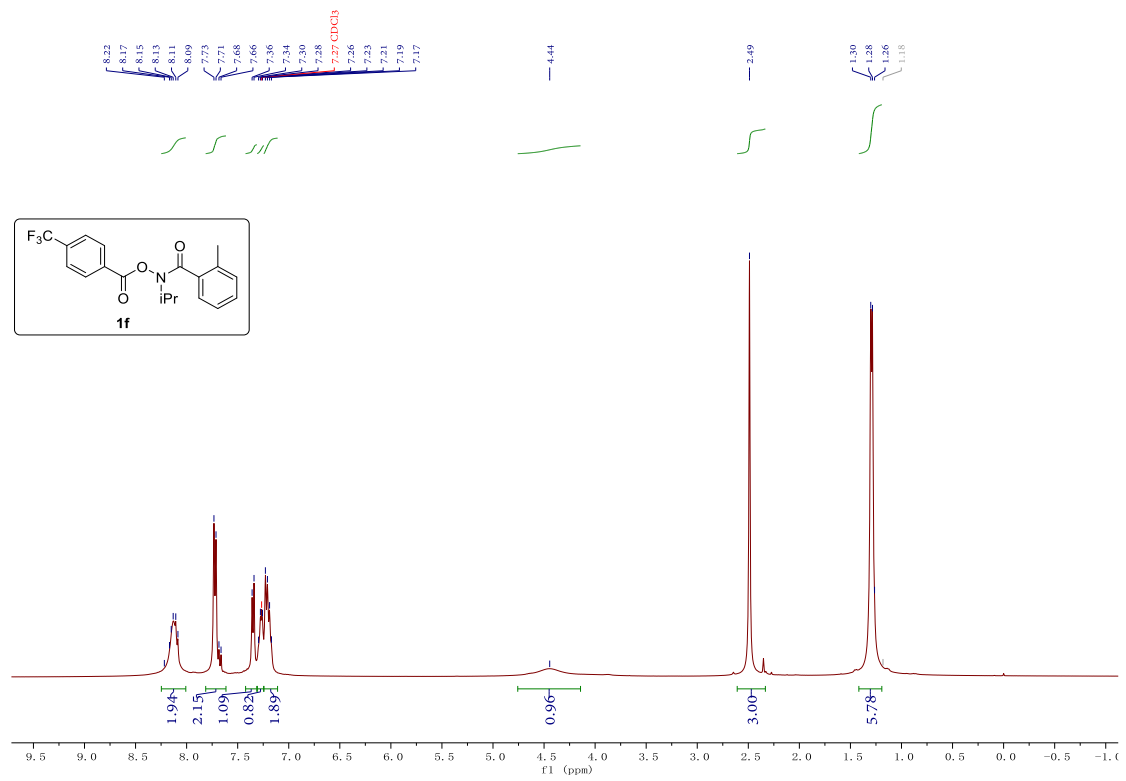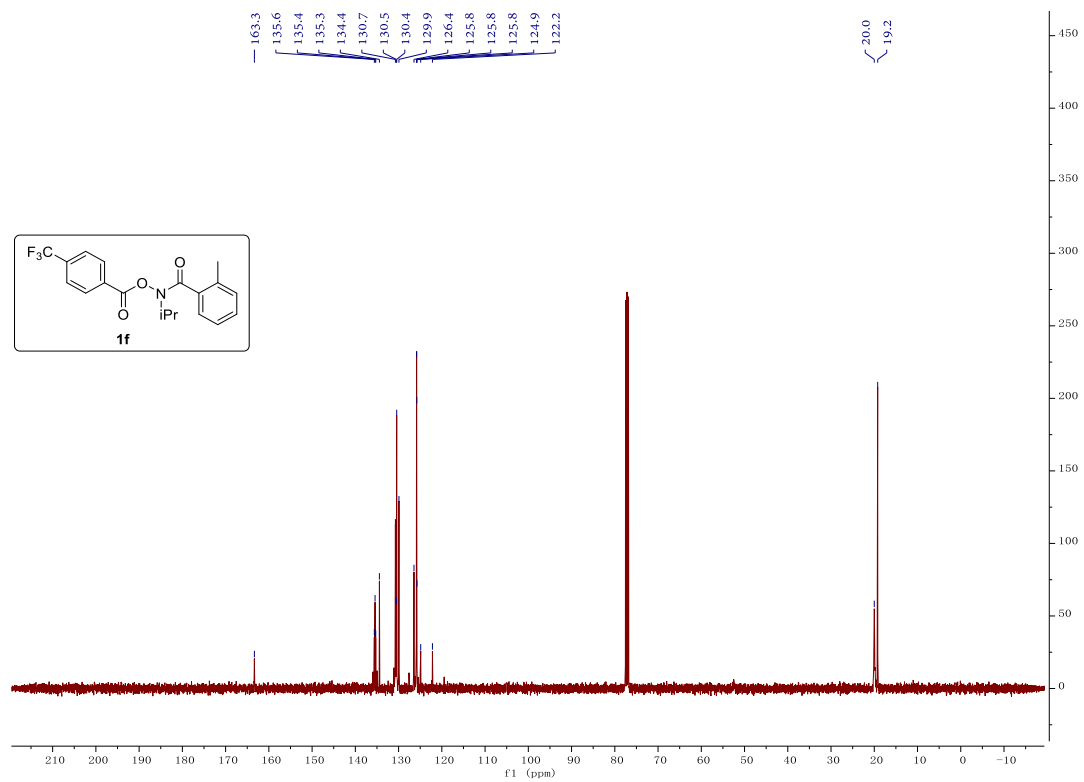



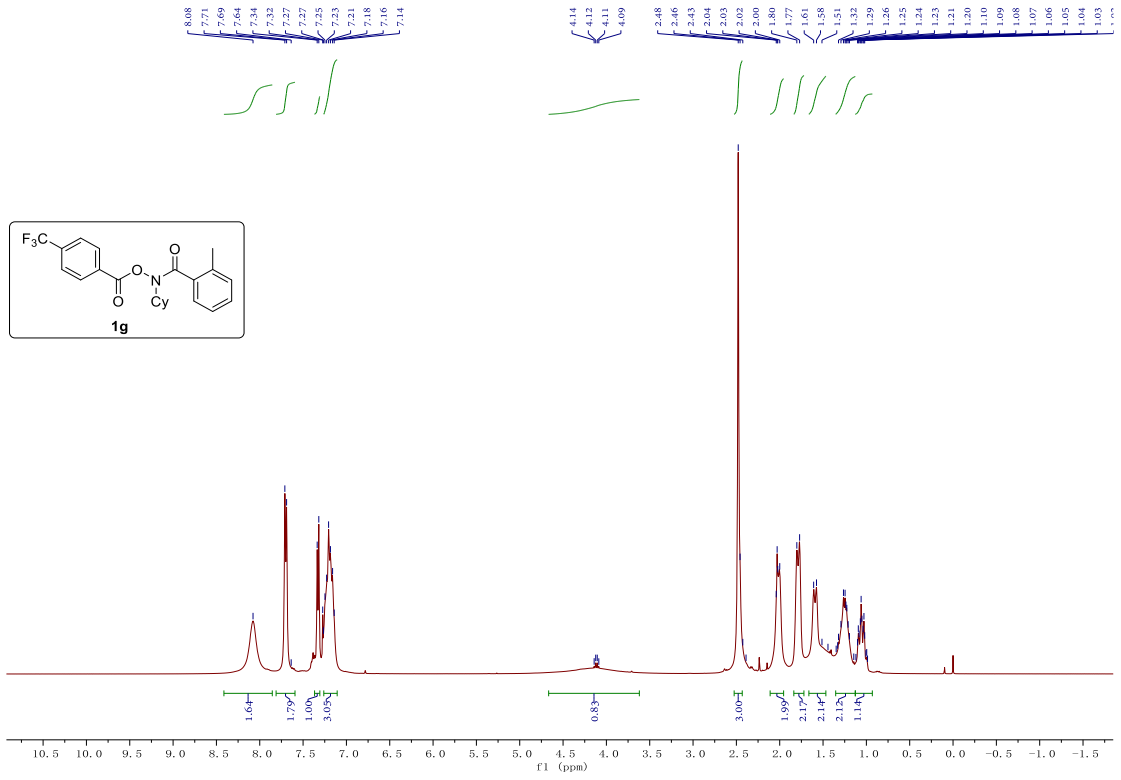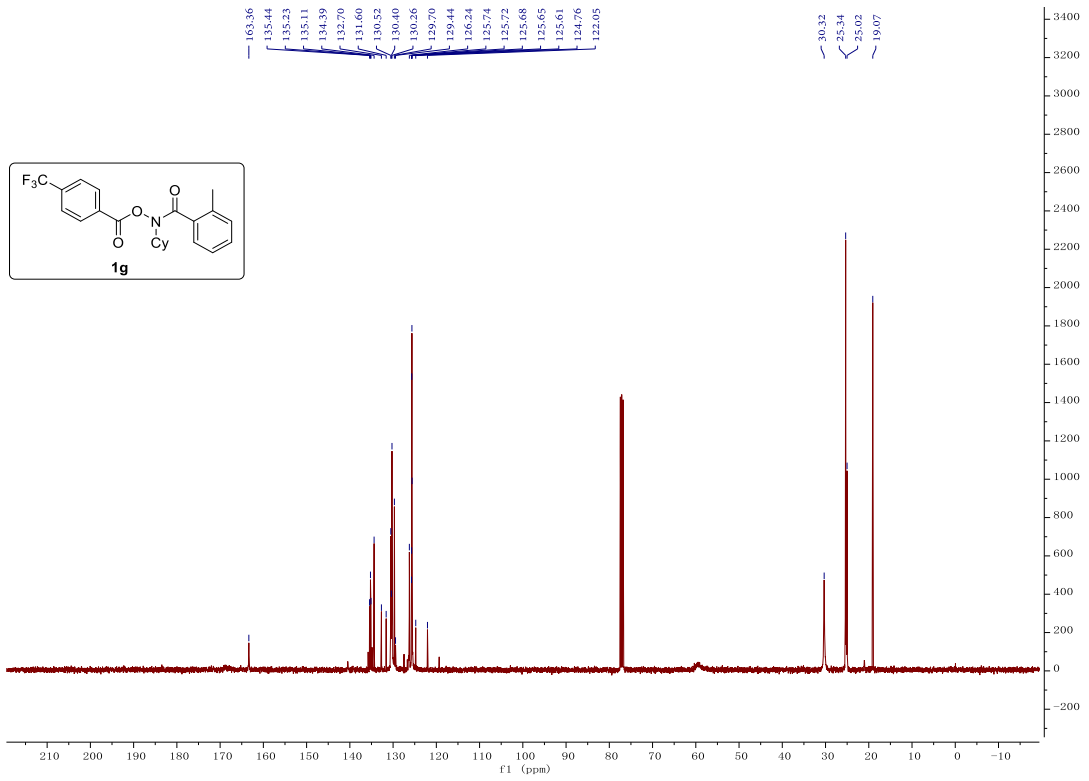

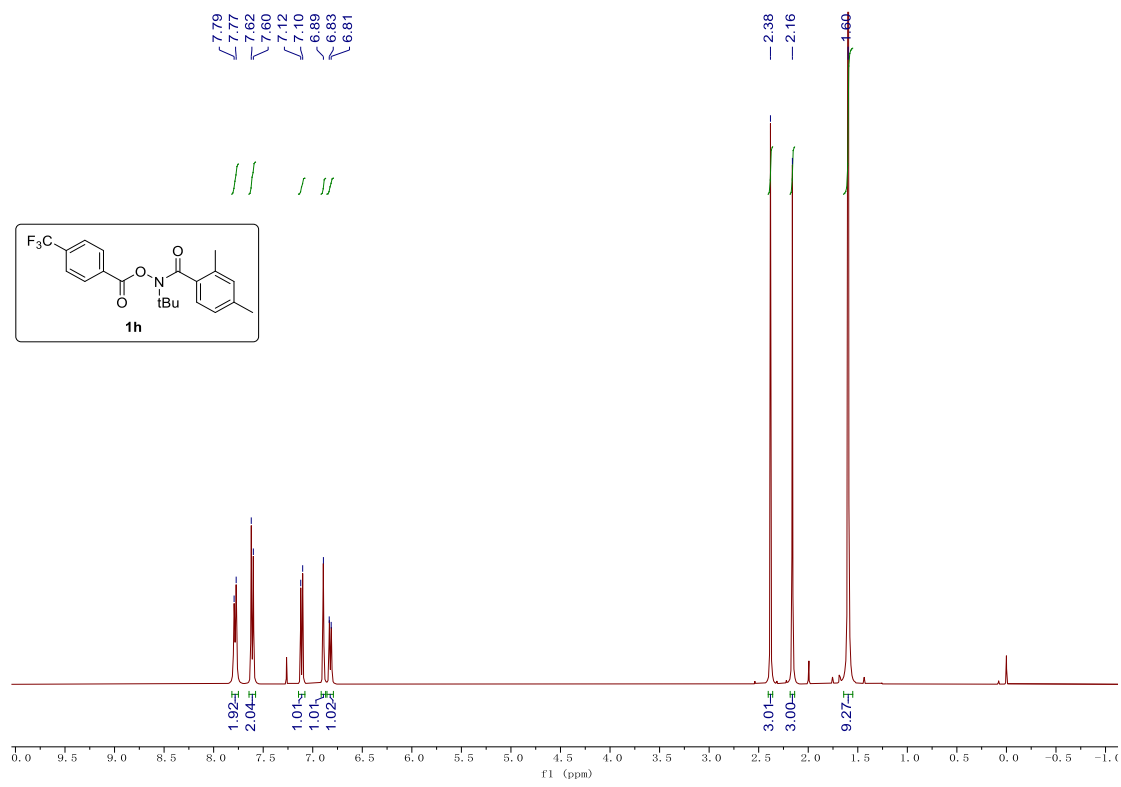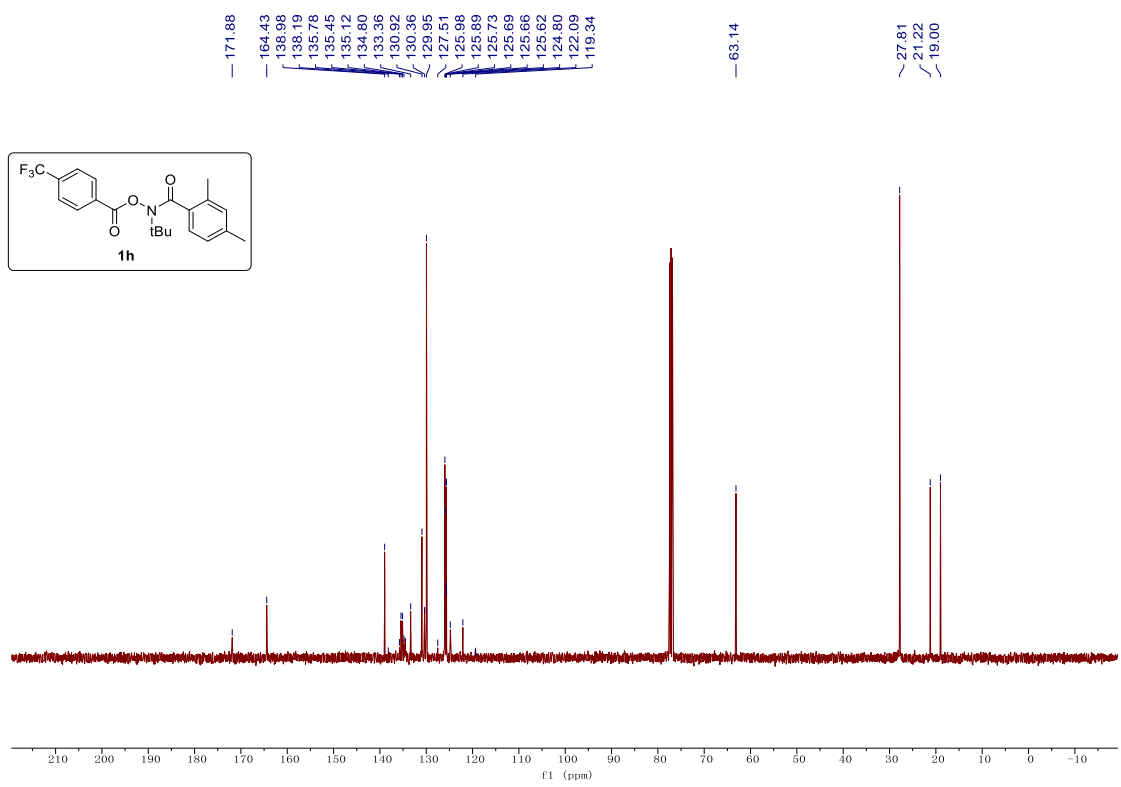

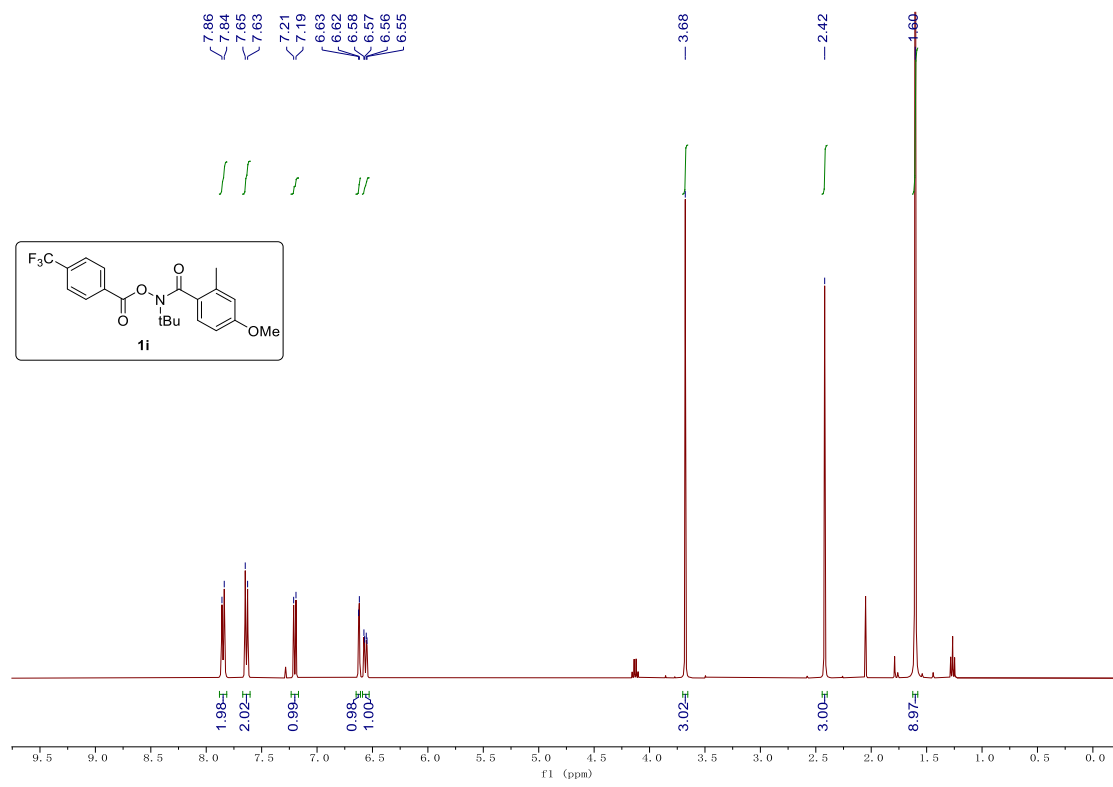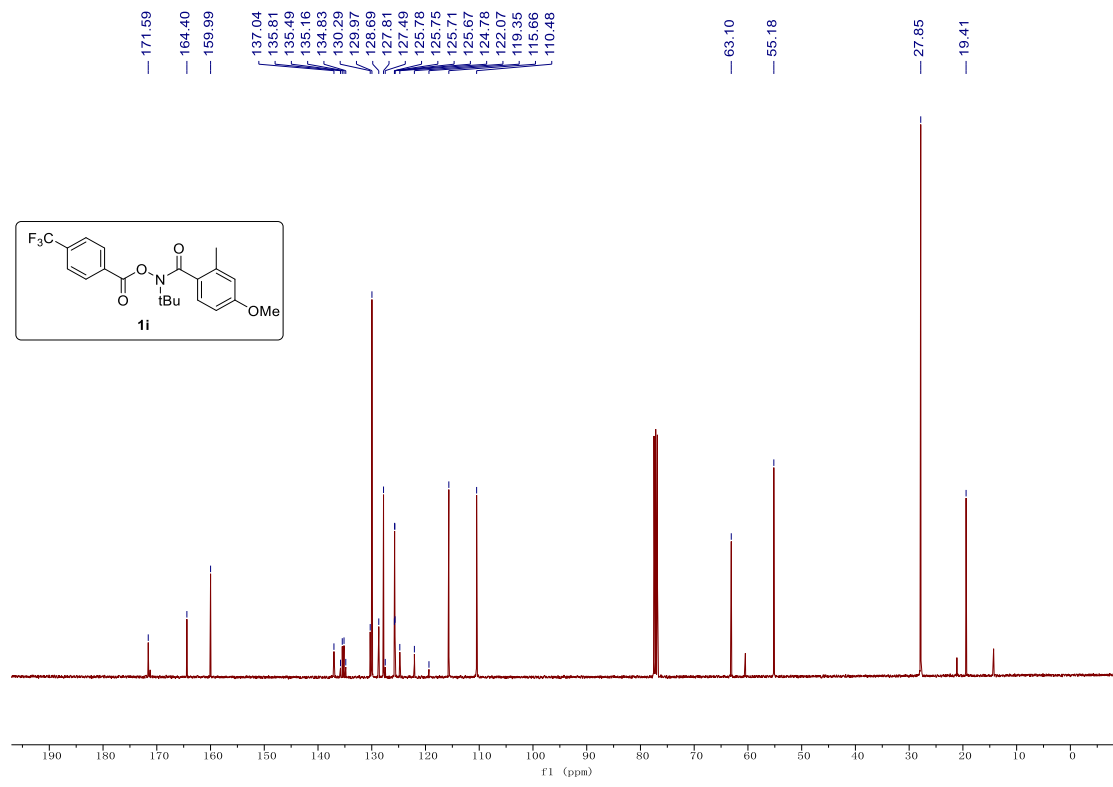

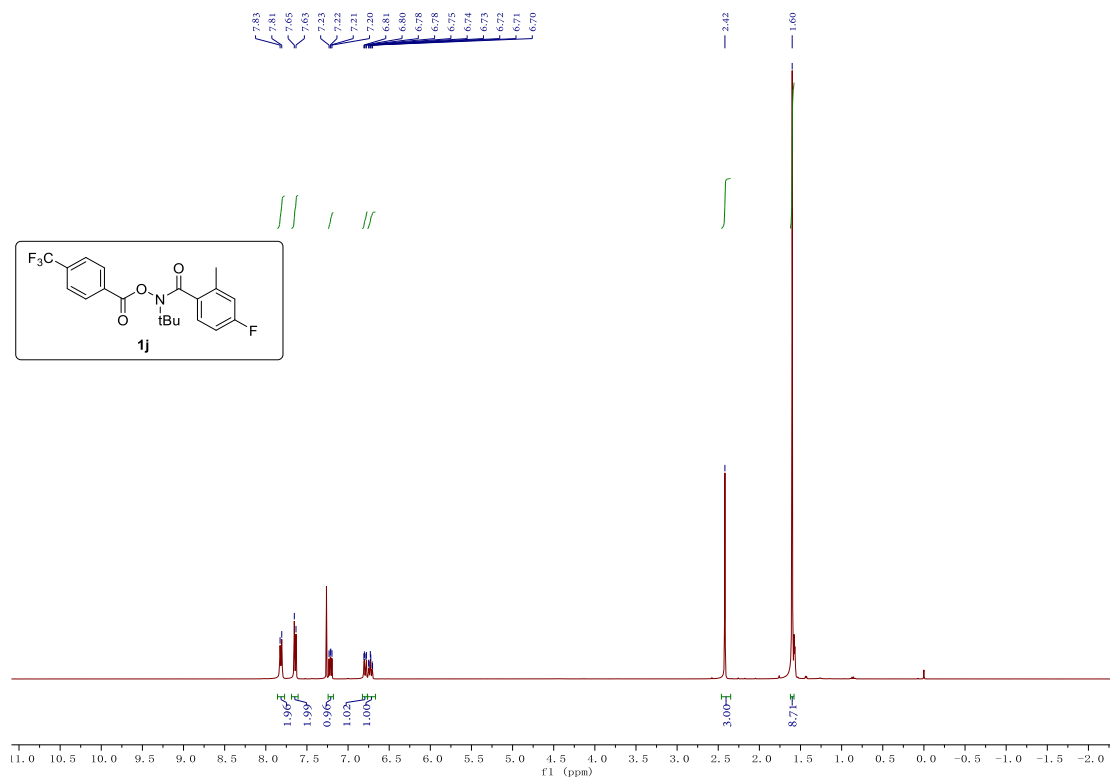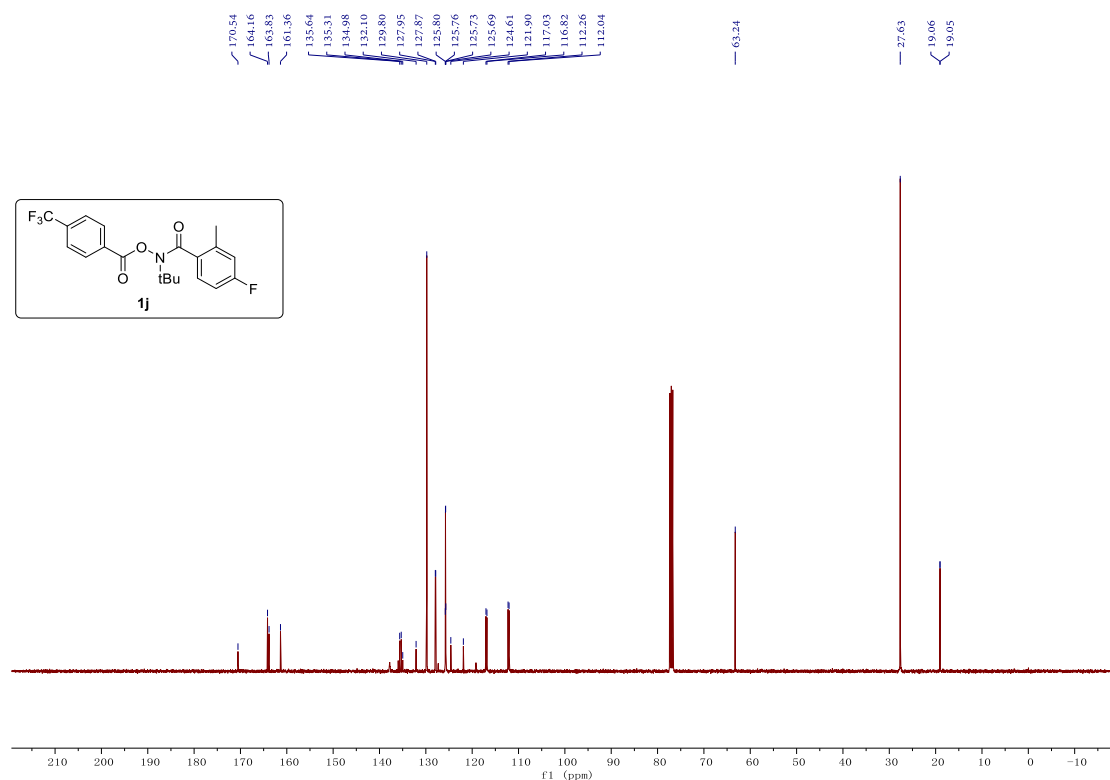

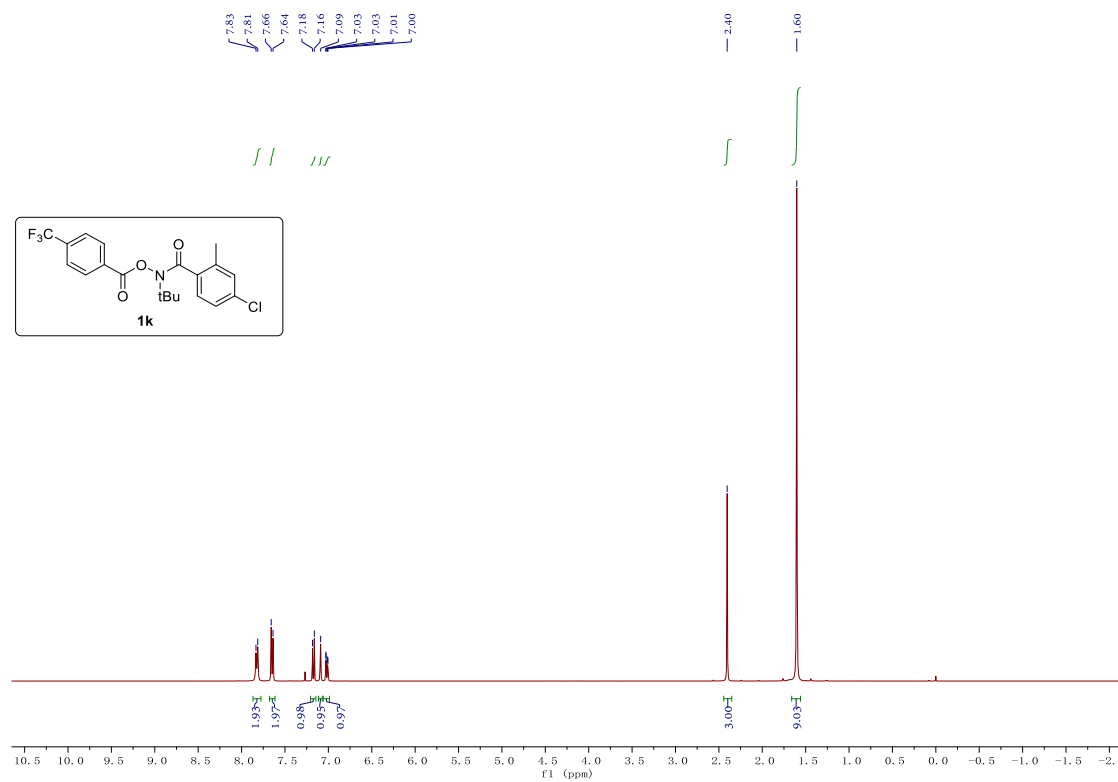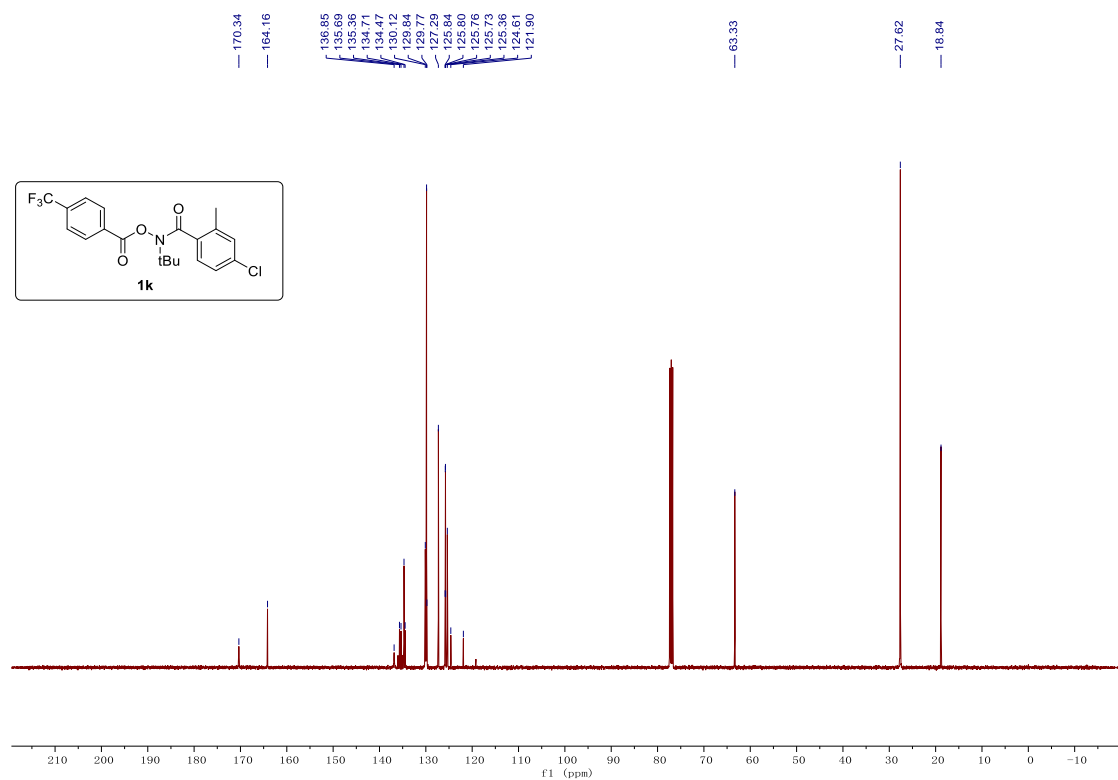

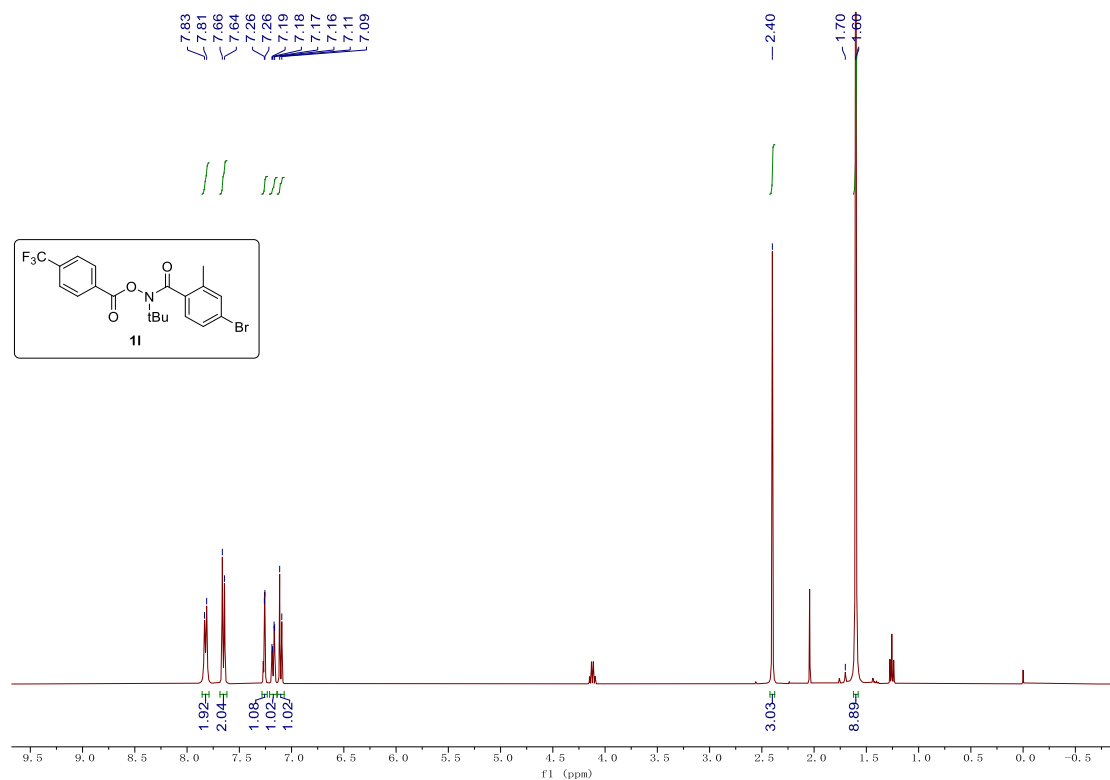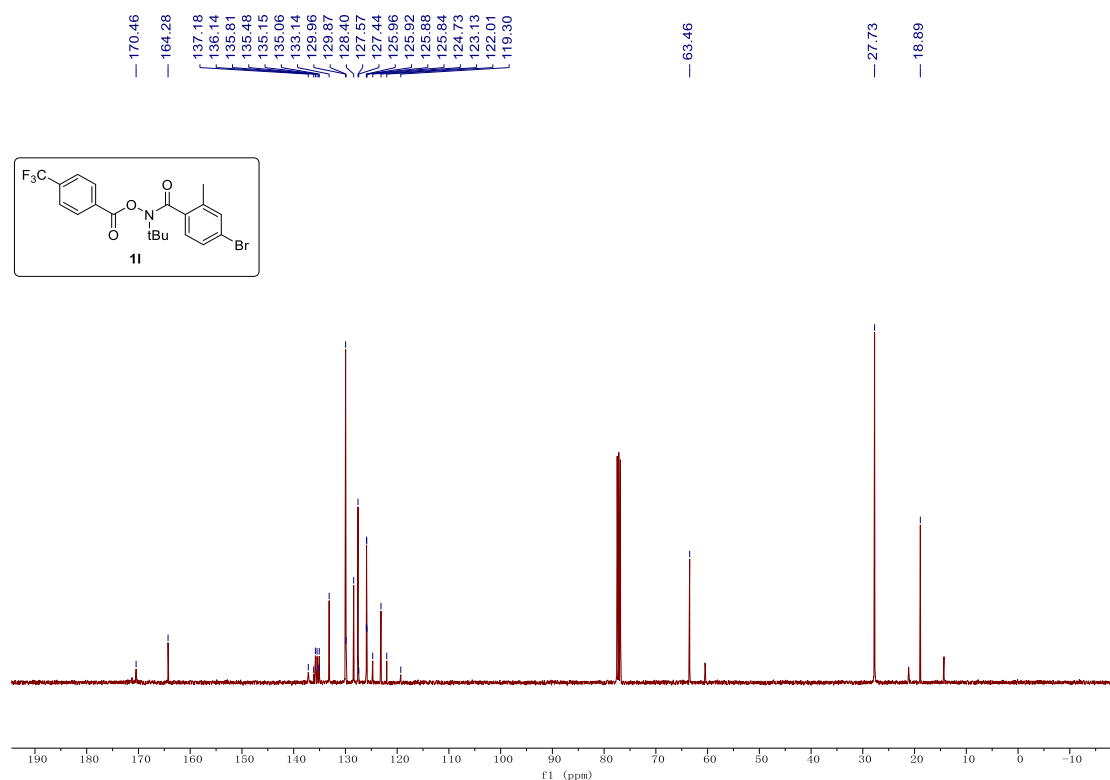

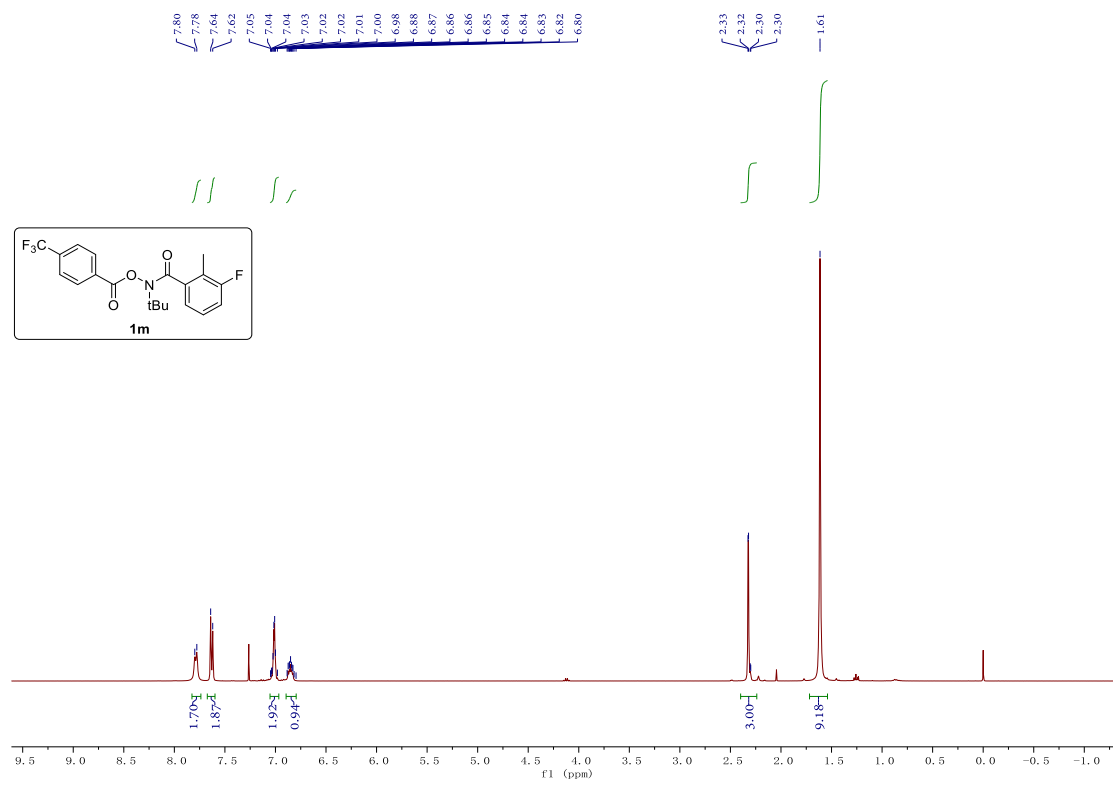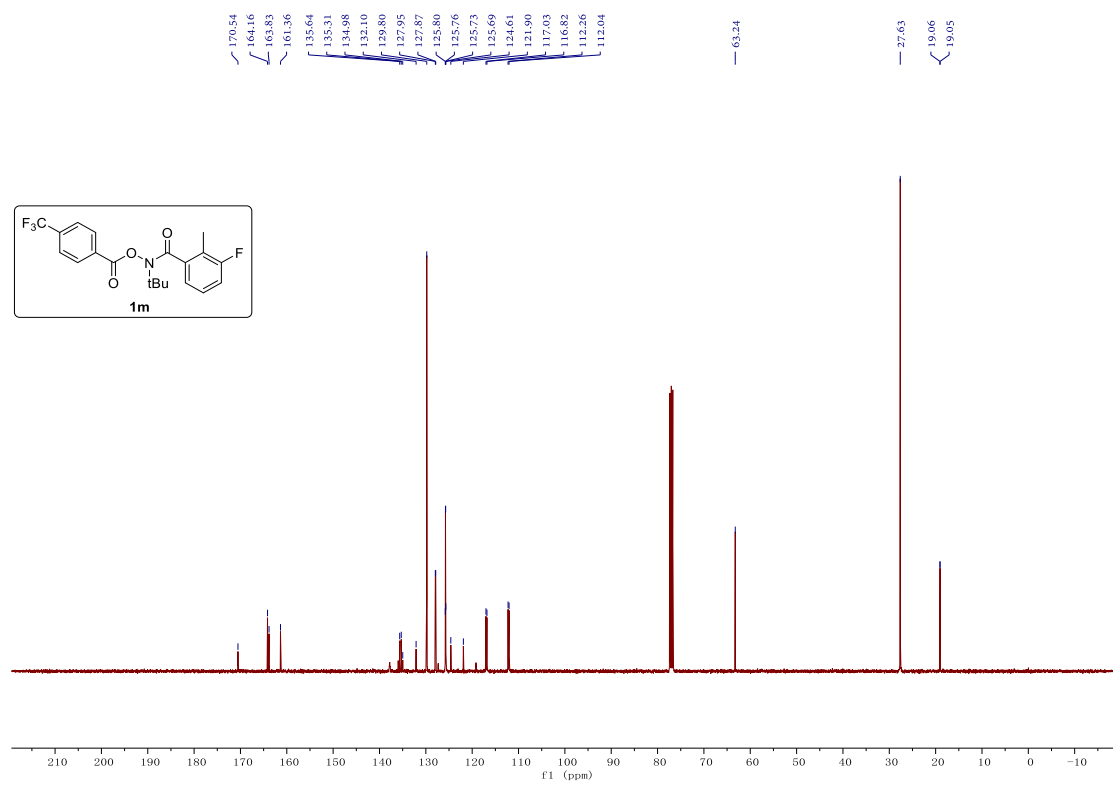

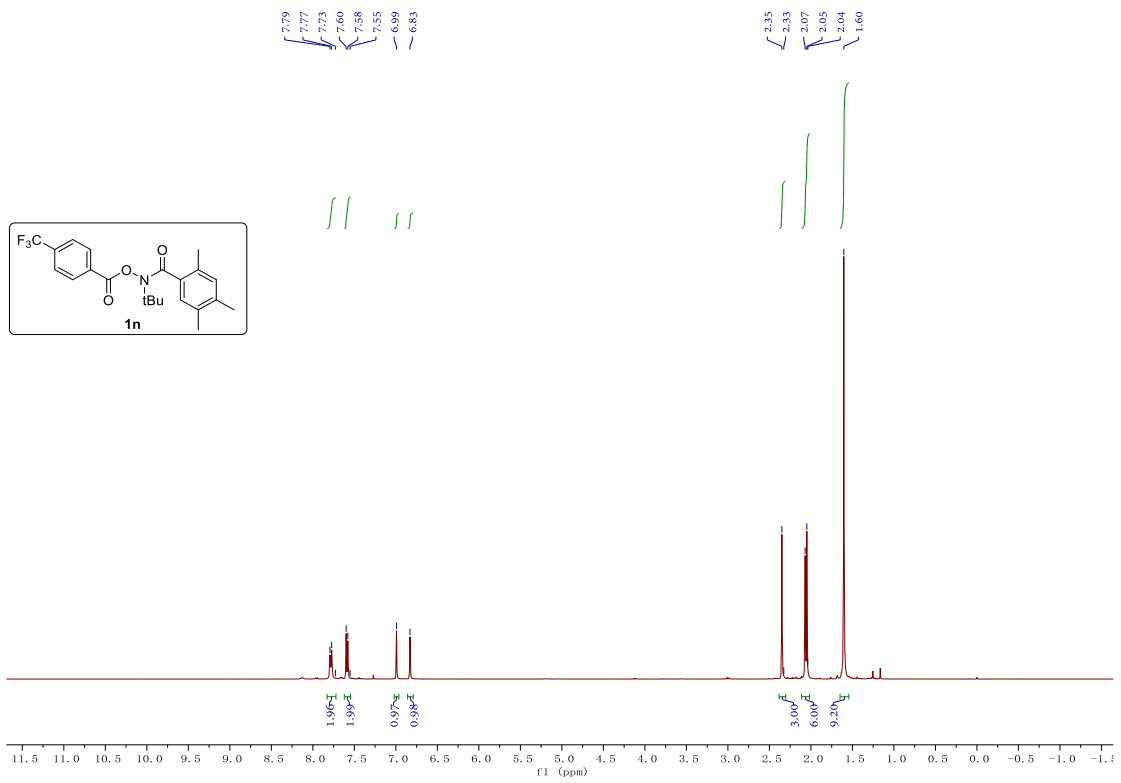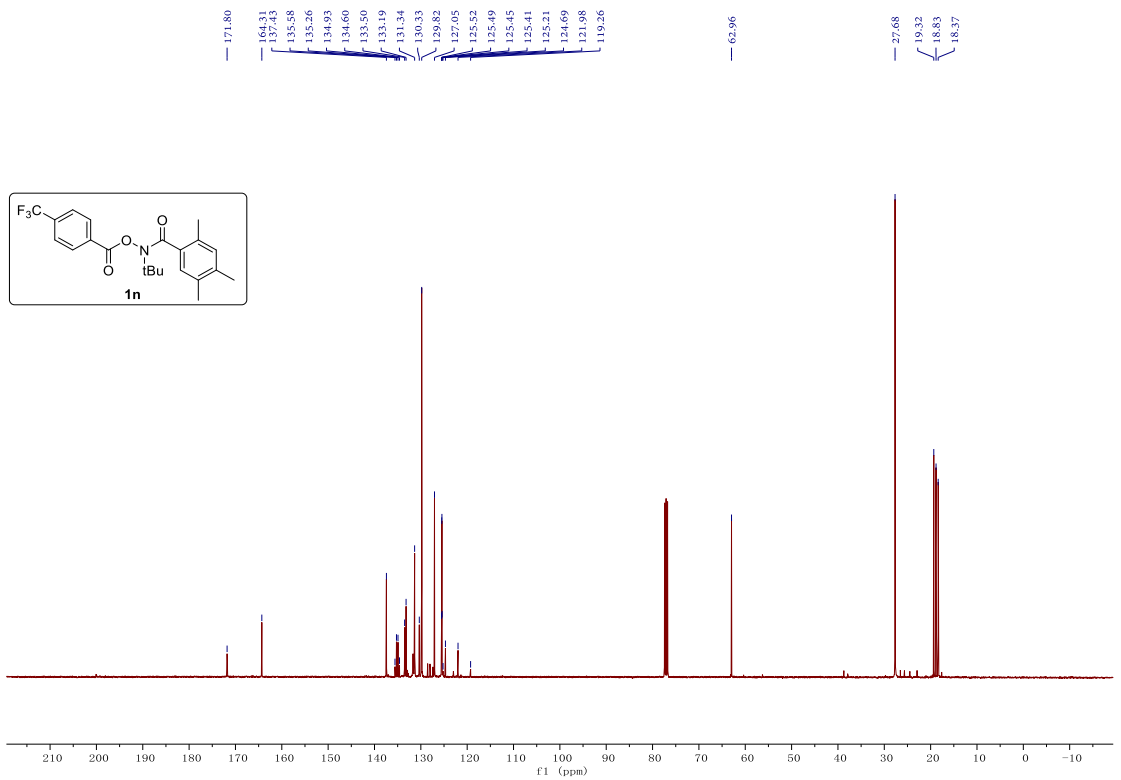



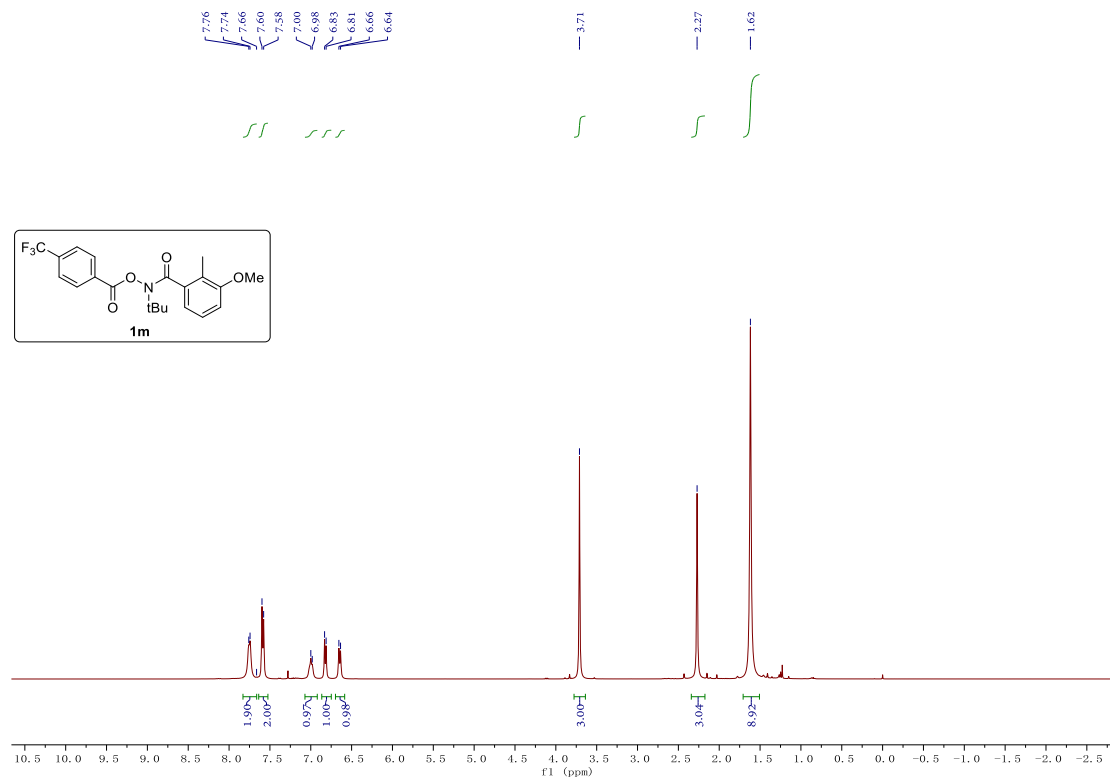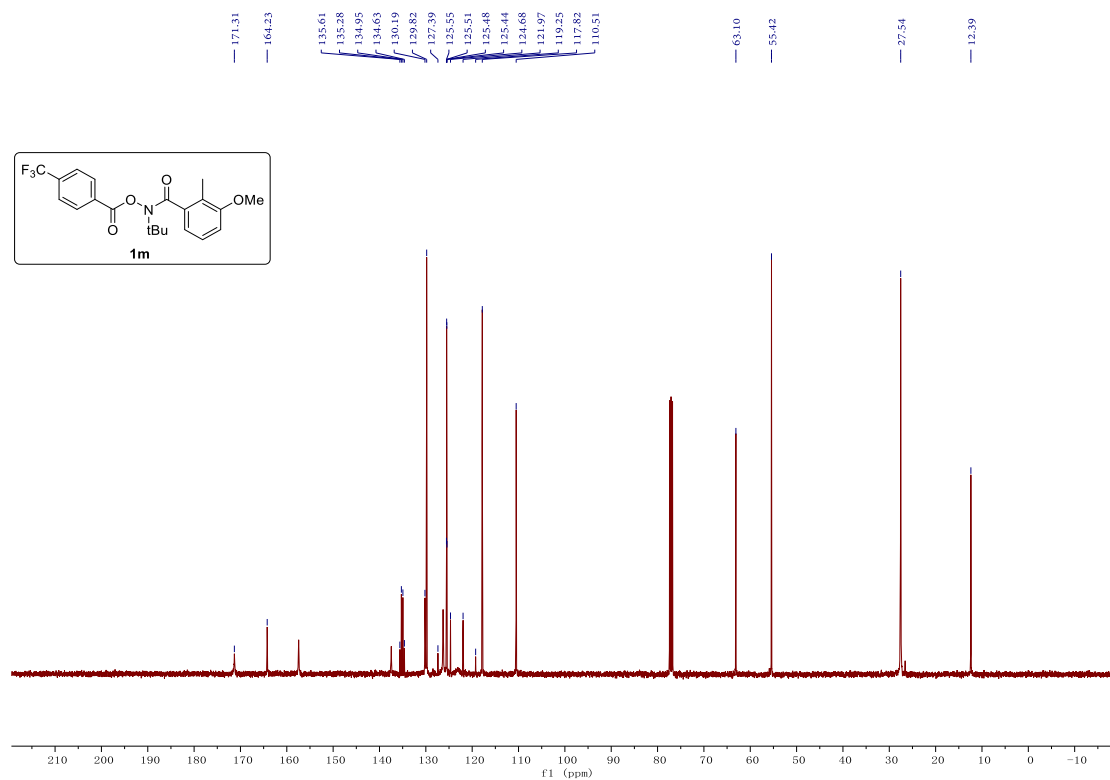

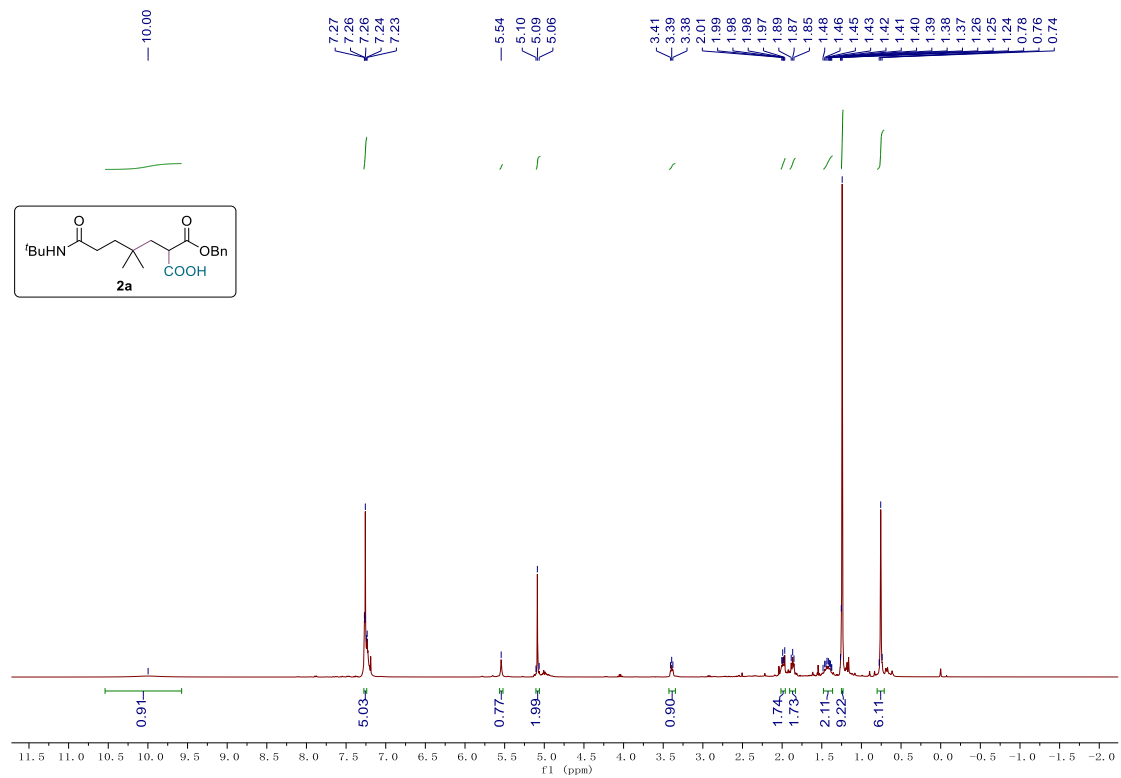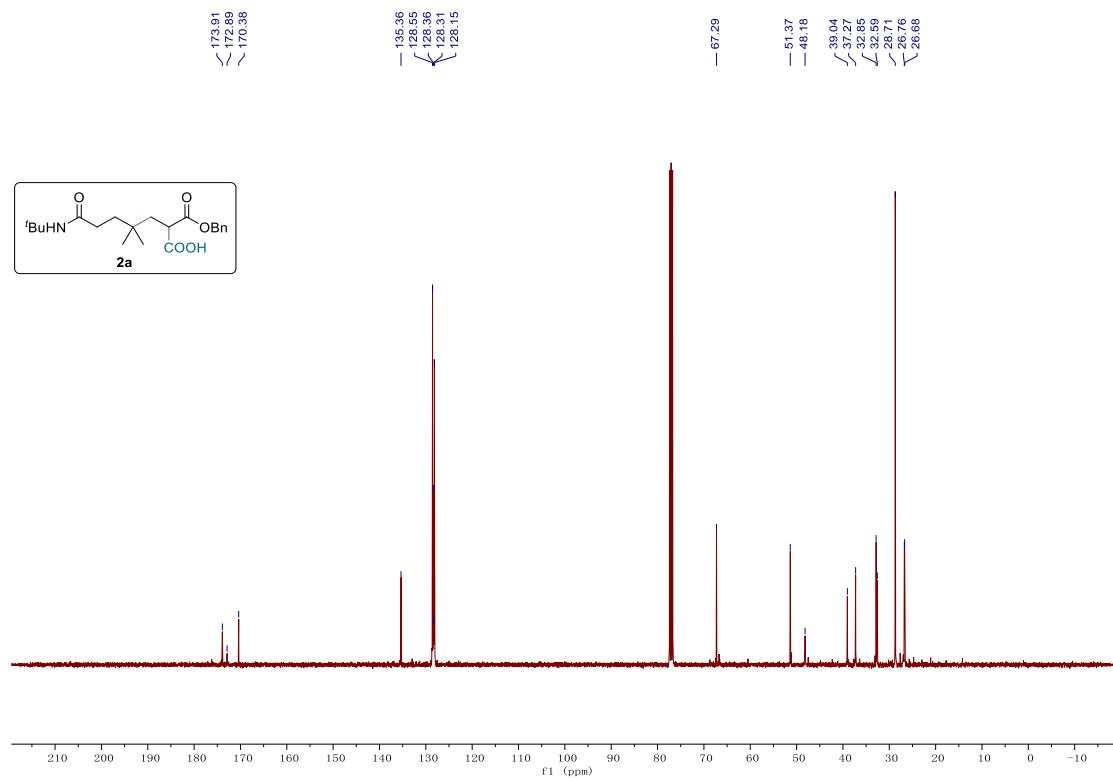

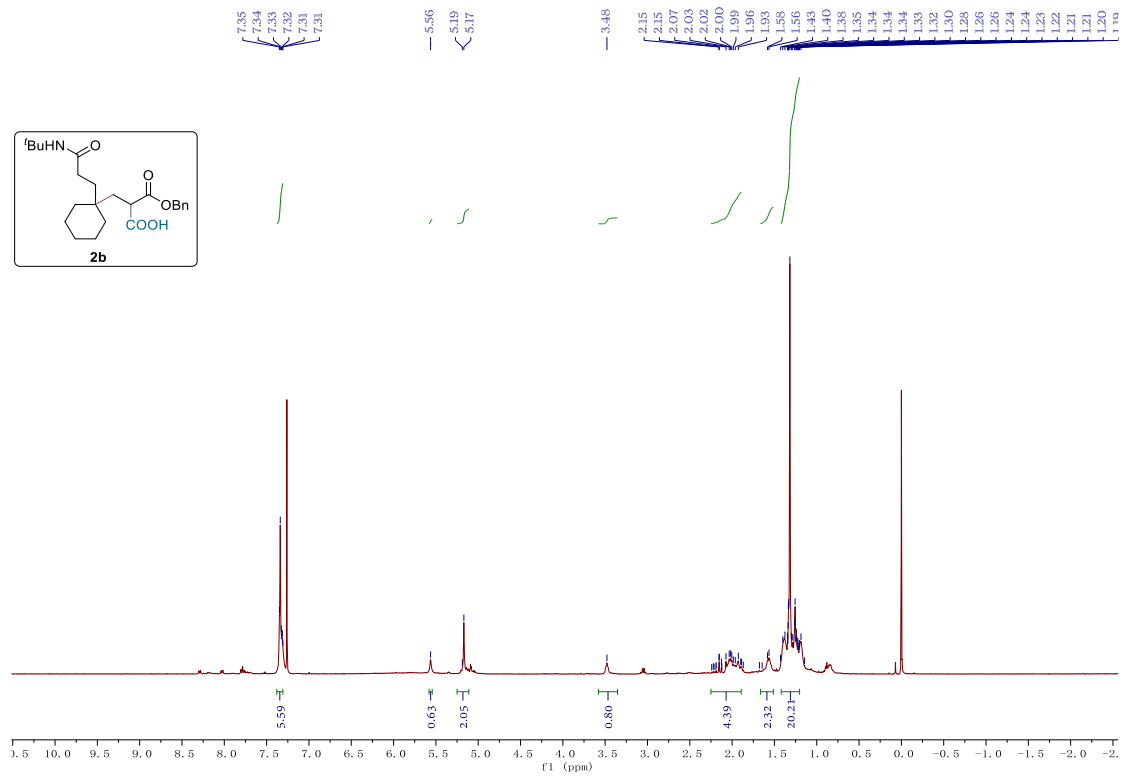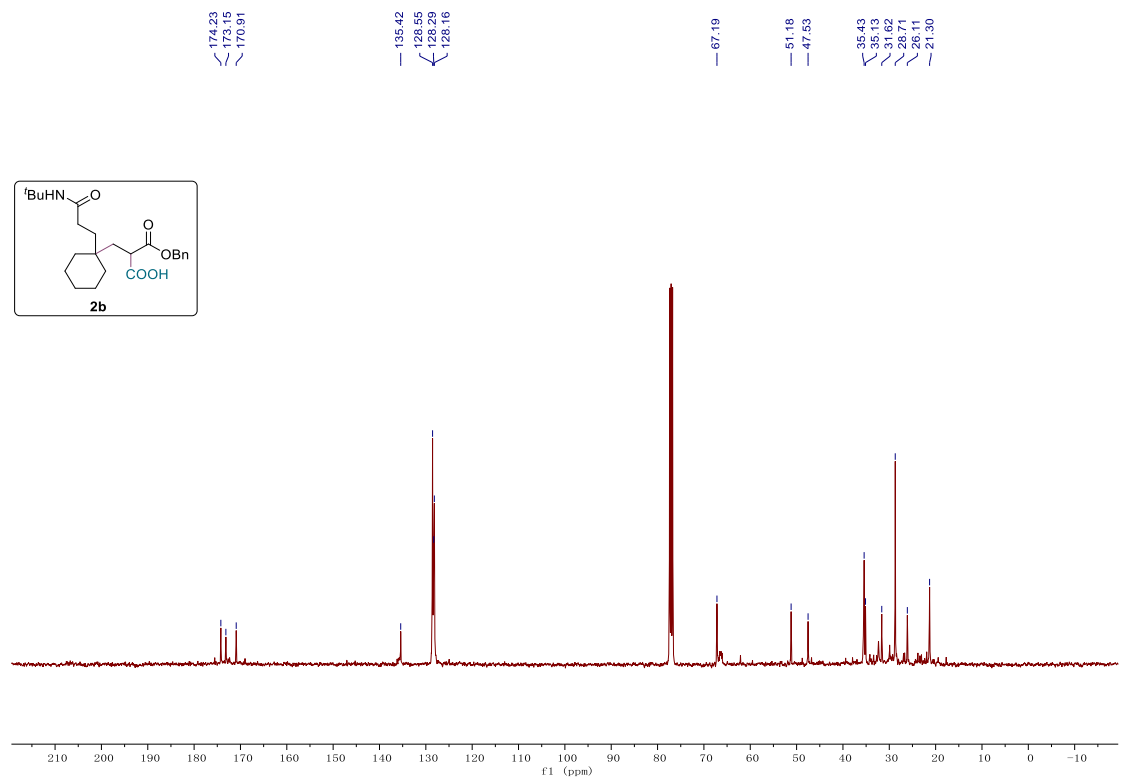

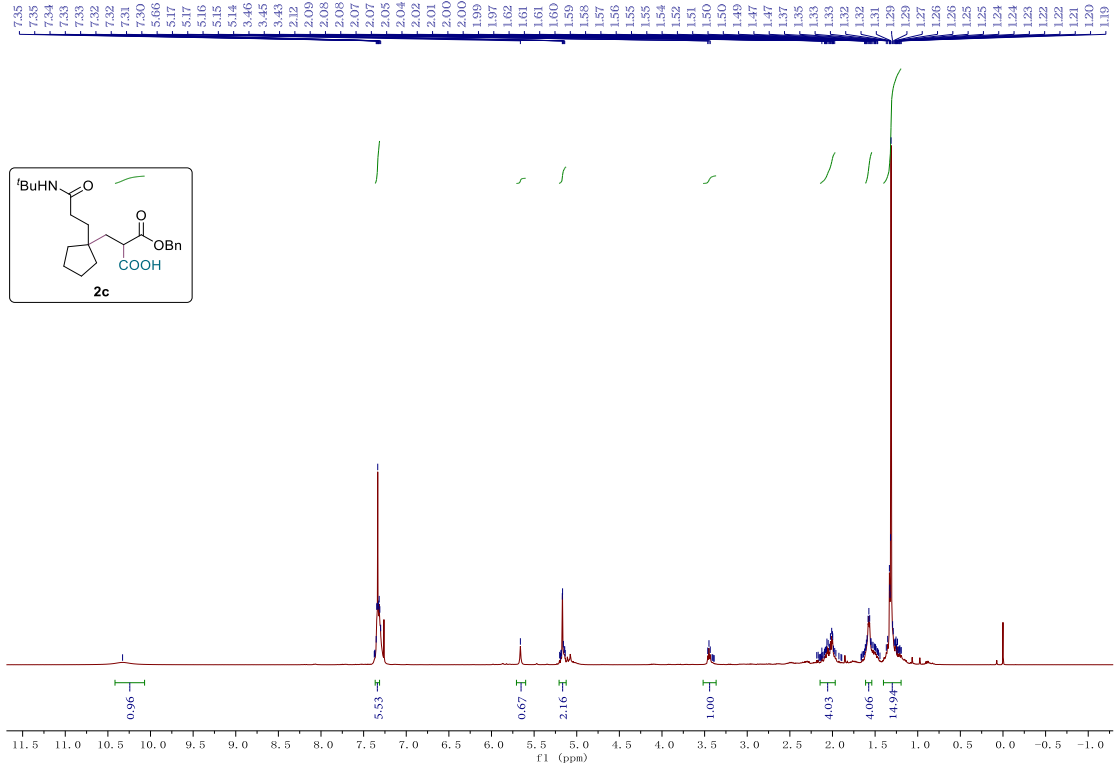

- 173.97
- 173.17
- 170.52
- 135.27
- 128.58
- 128.56
- 128.37
- 128.16
- 67.36
- 51.30
- 44.99
- 37.33
- 37.25
- 35.80
- 33.74
- 33.14
- 28.71
- 24.05
- 24.02

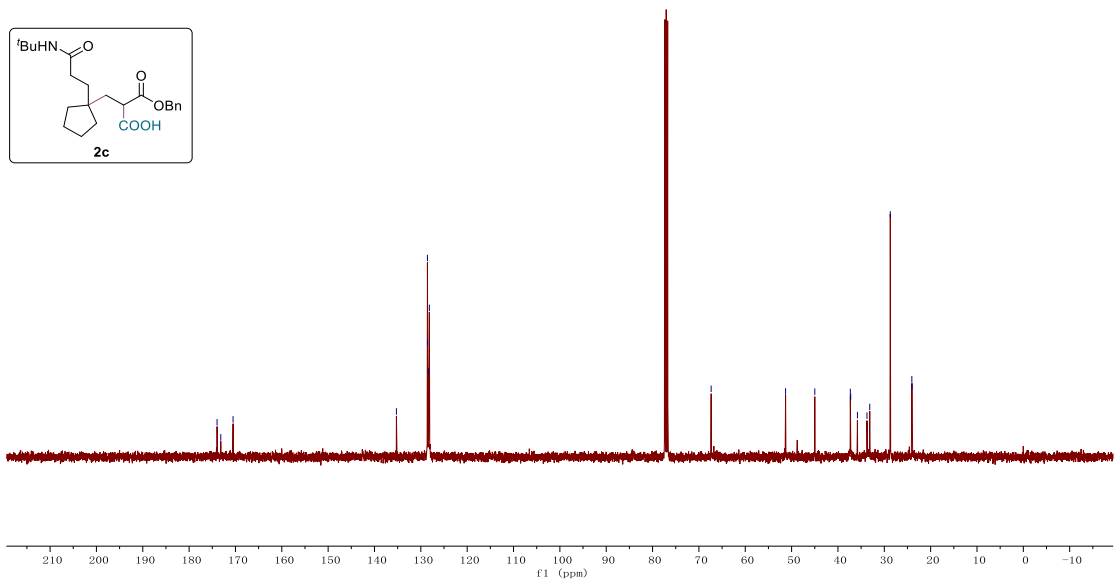

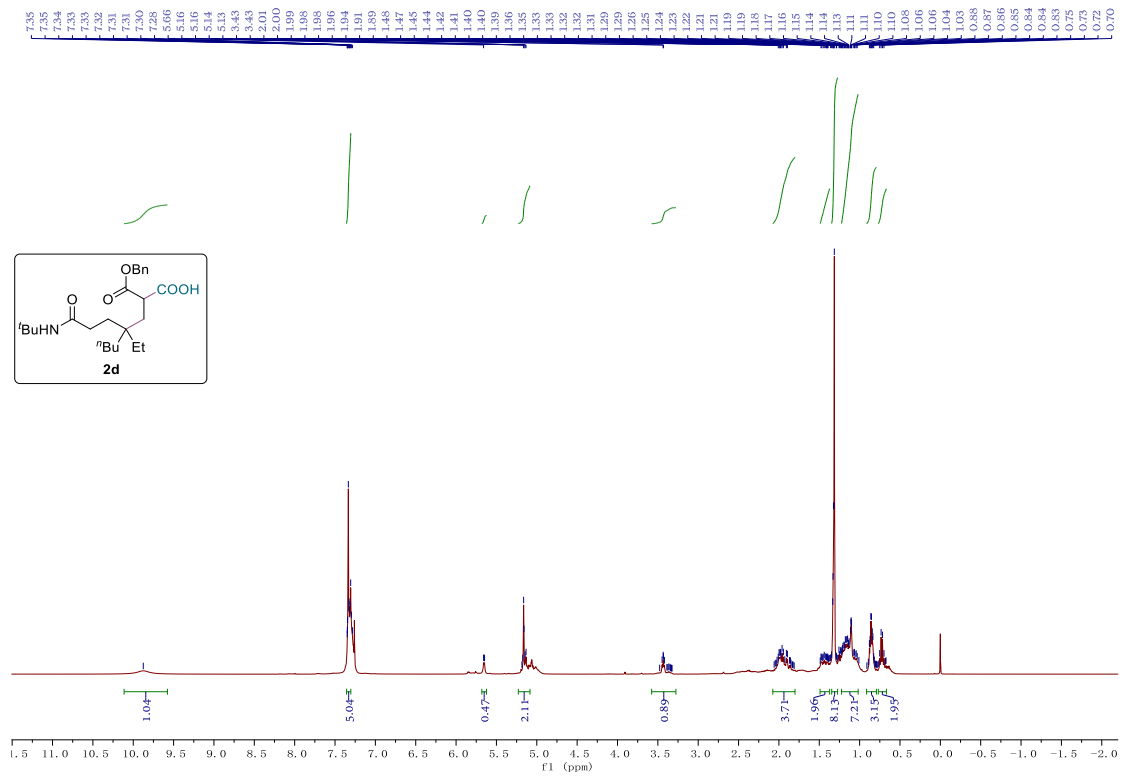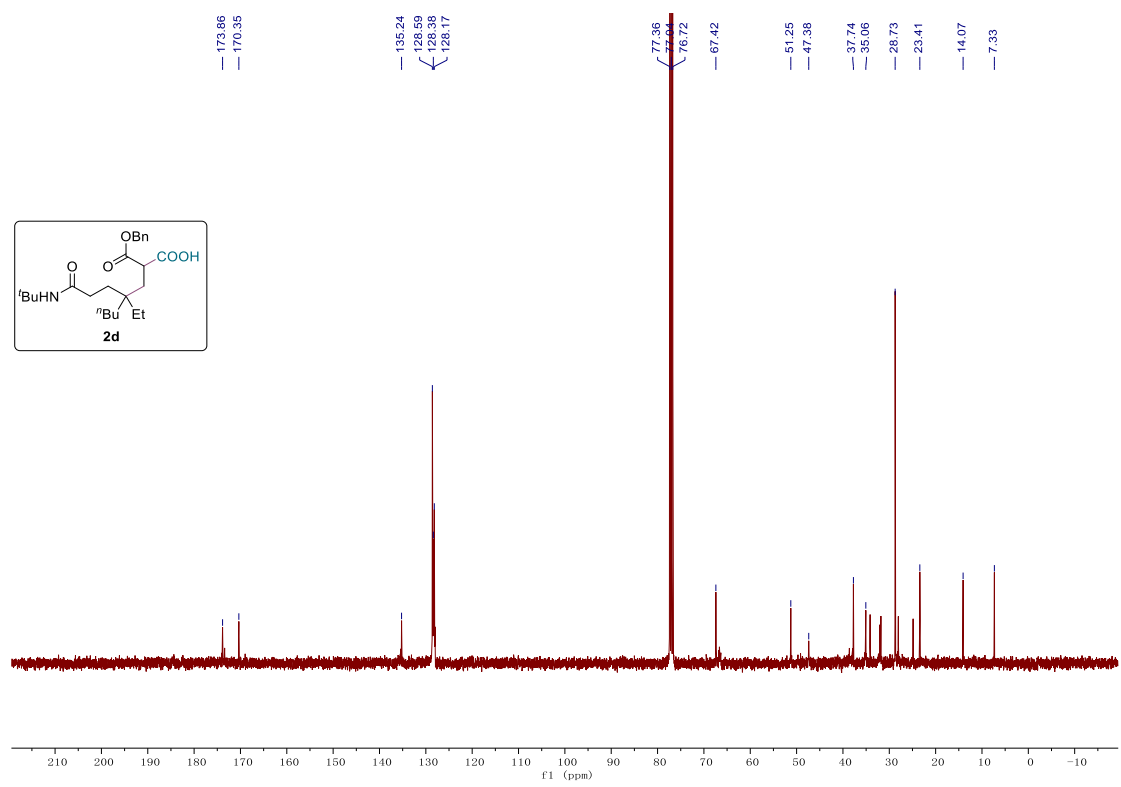

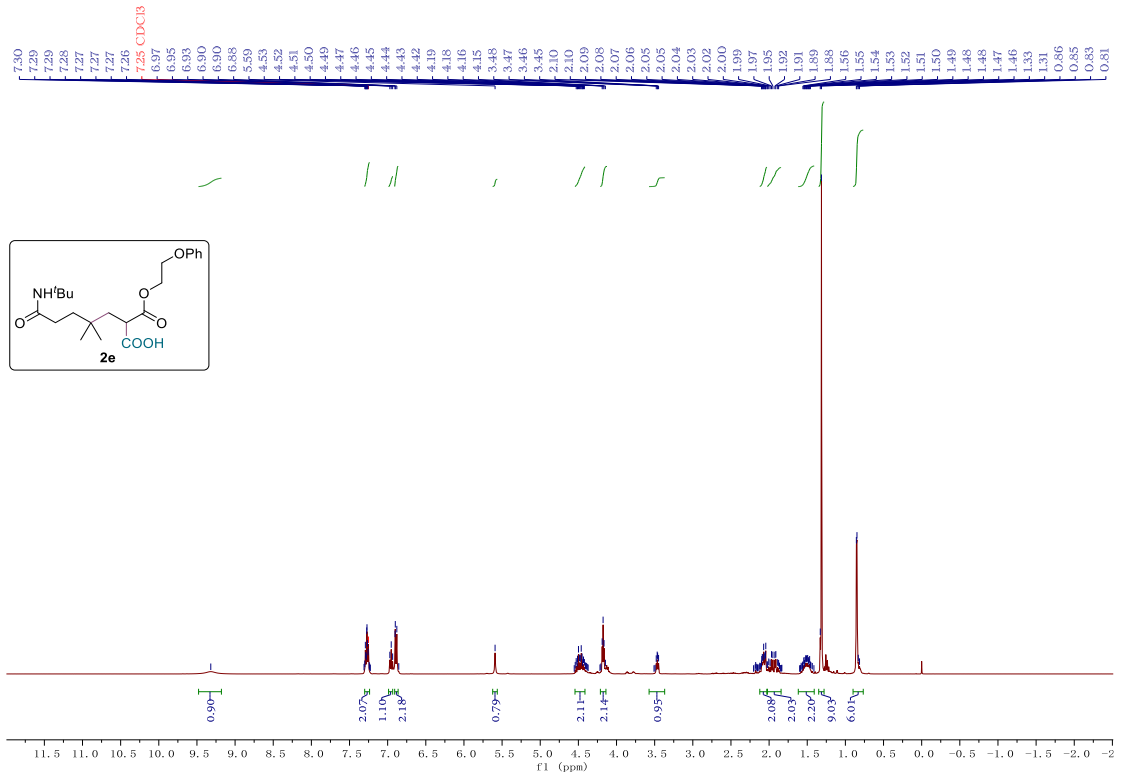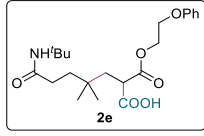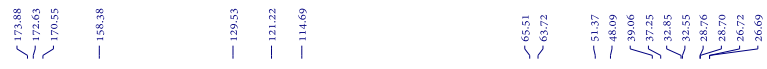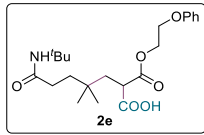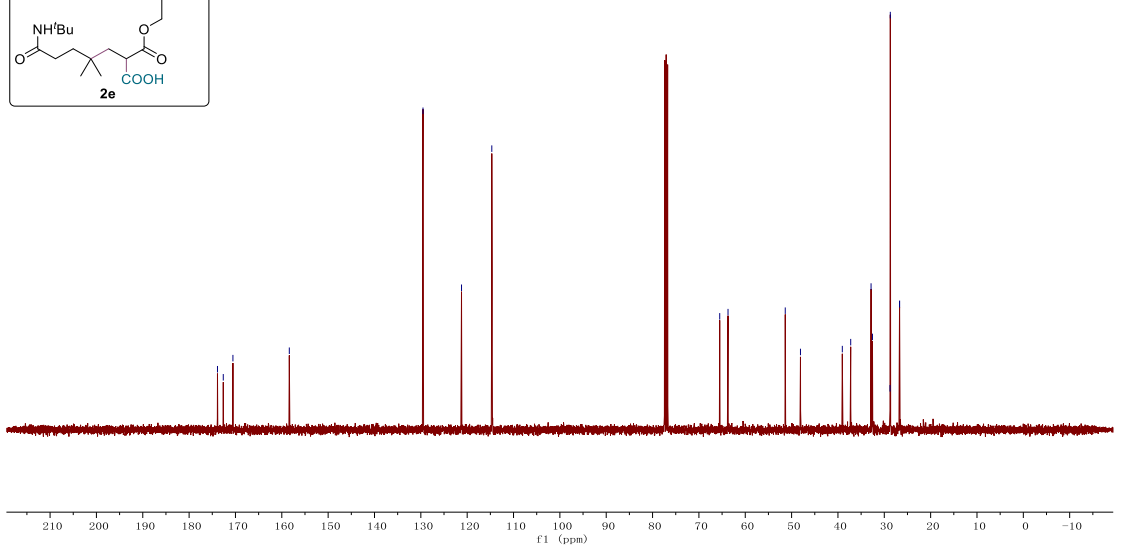

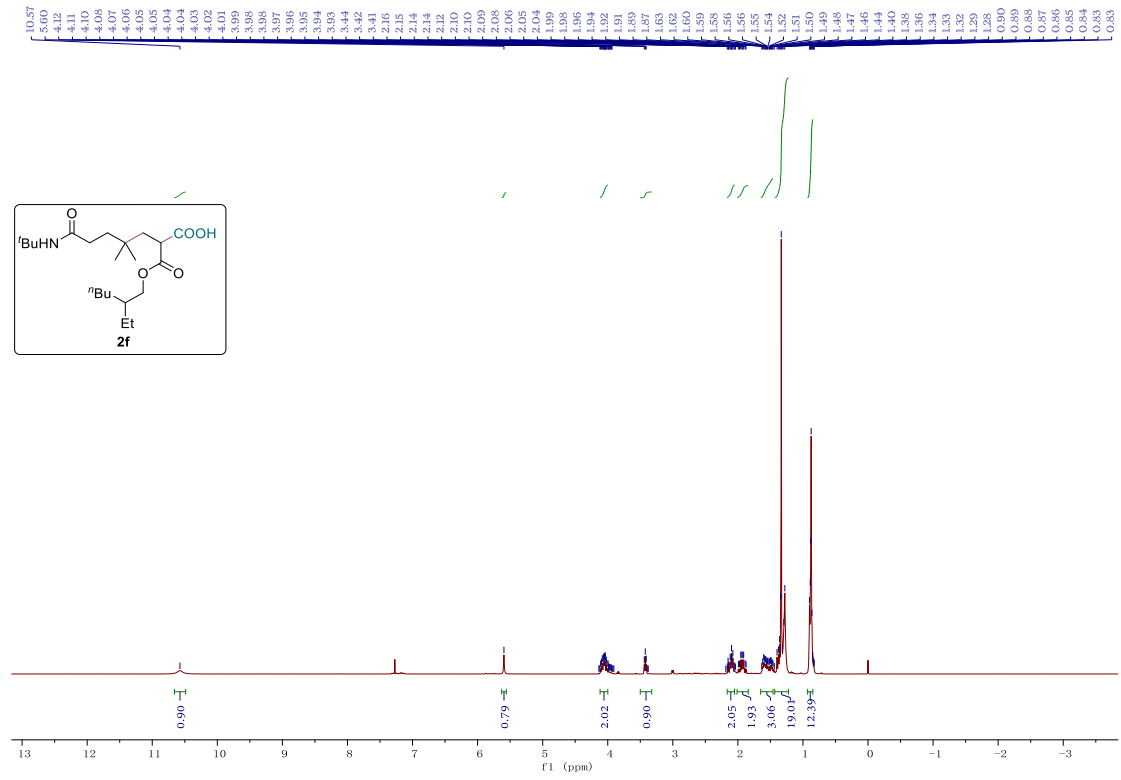

173.76  
173.73  
170.58

68.07  
68.05

51.34  
46.10  
38.62  
38.61  
37.26  
32.83  
32.61  
30.25  
28.85  
28.82  
28.71  
26.74  
26.67  
23.68  
22.98  
22.94  
22.91  
14.04  
10.92  
10.90

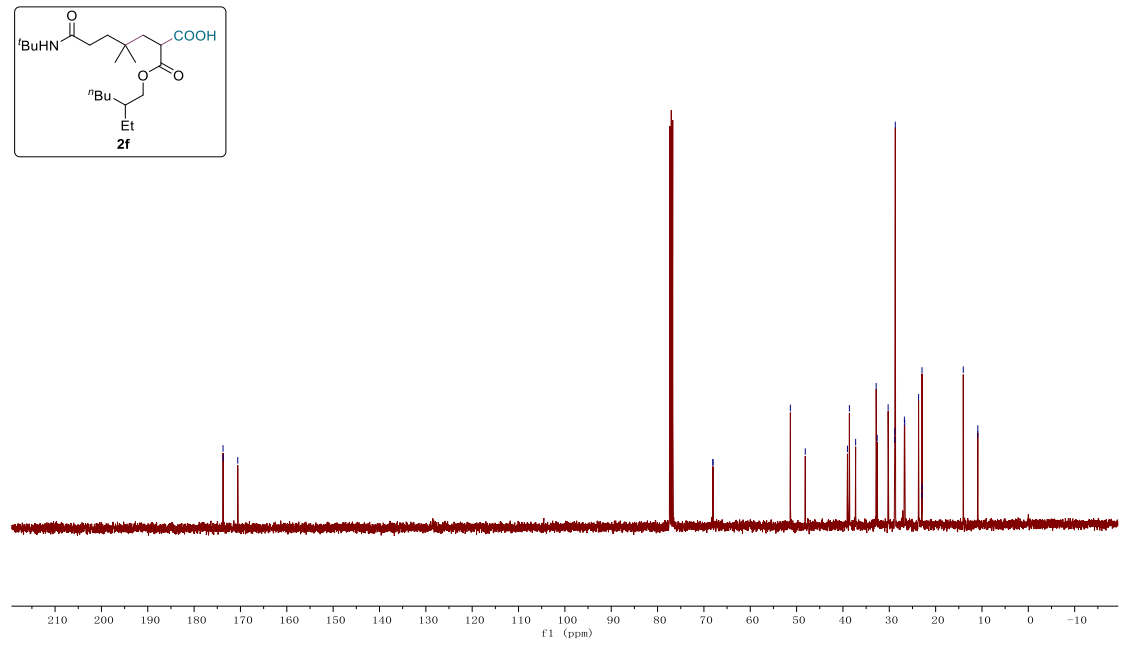





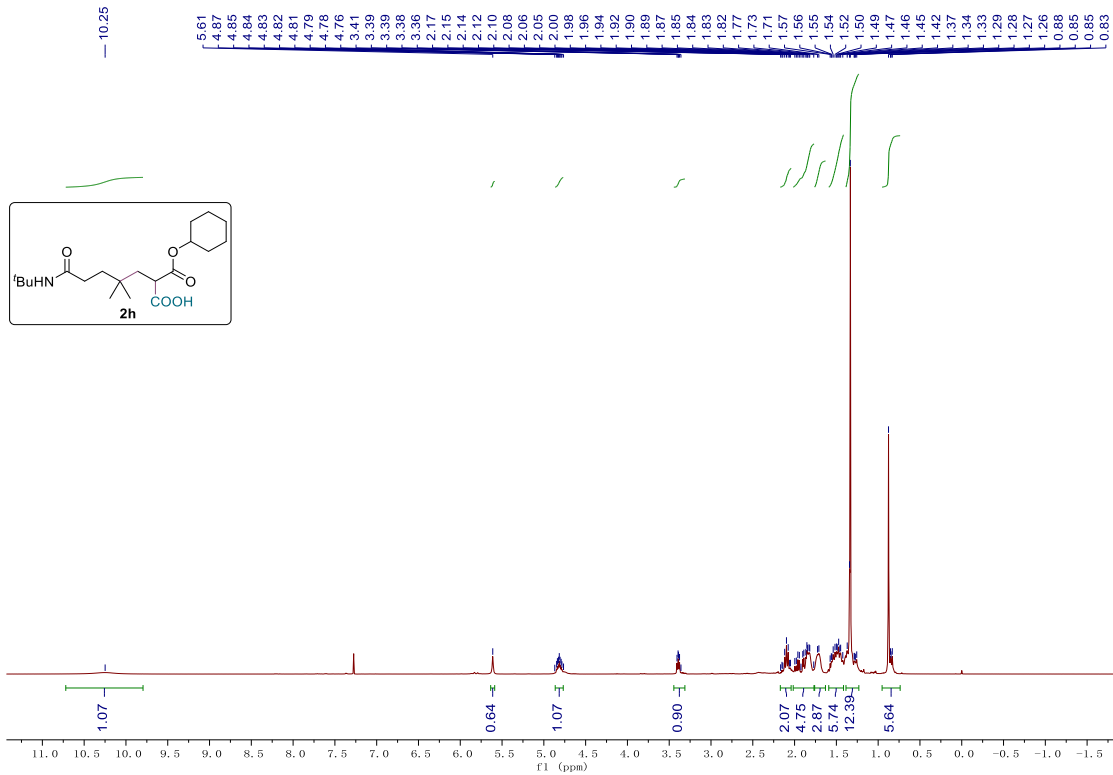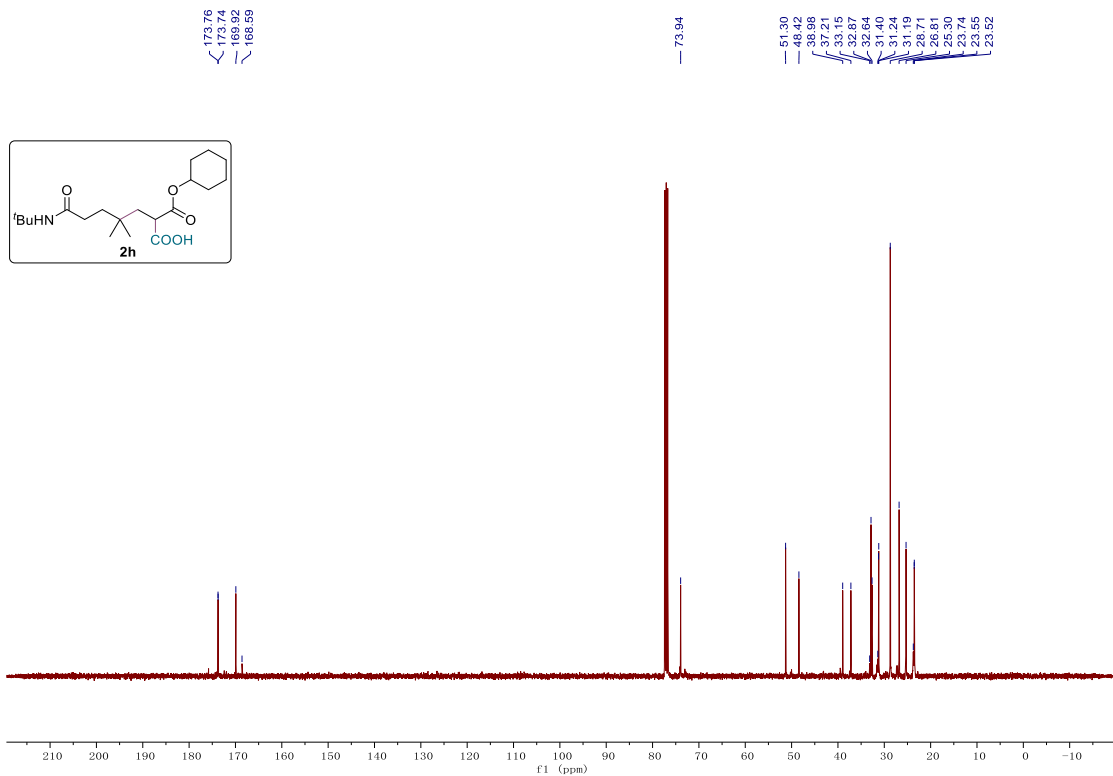

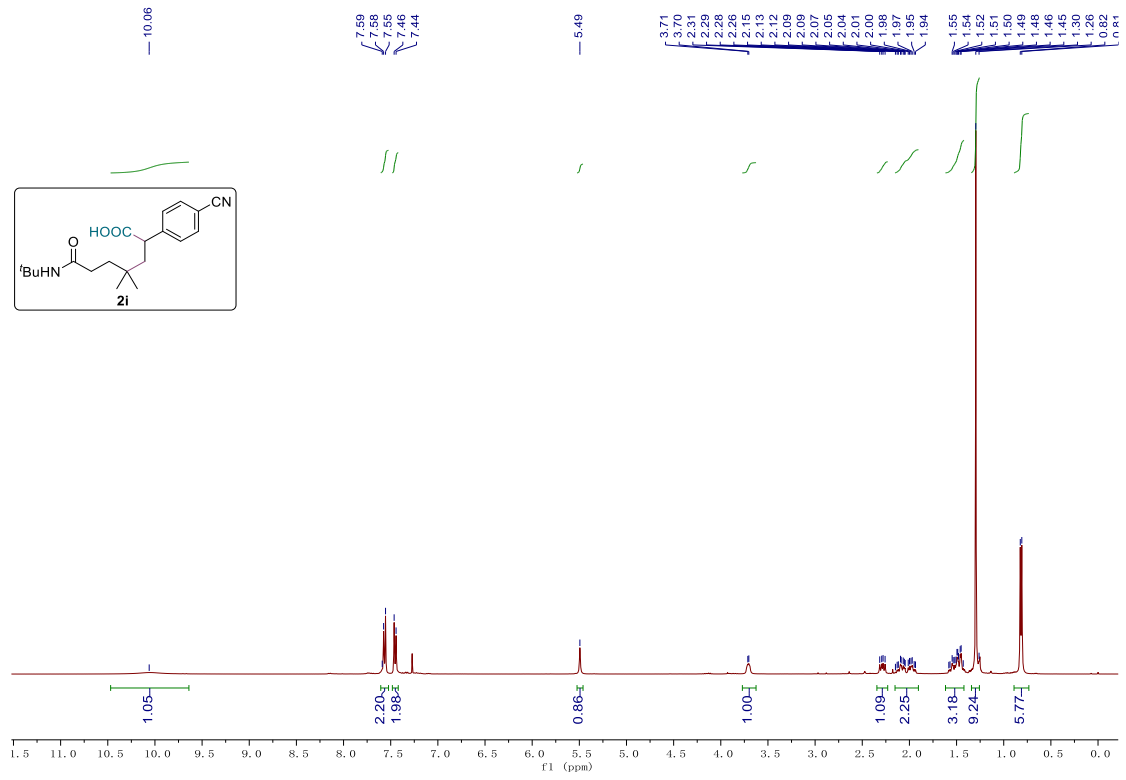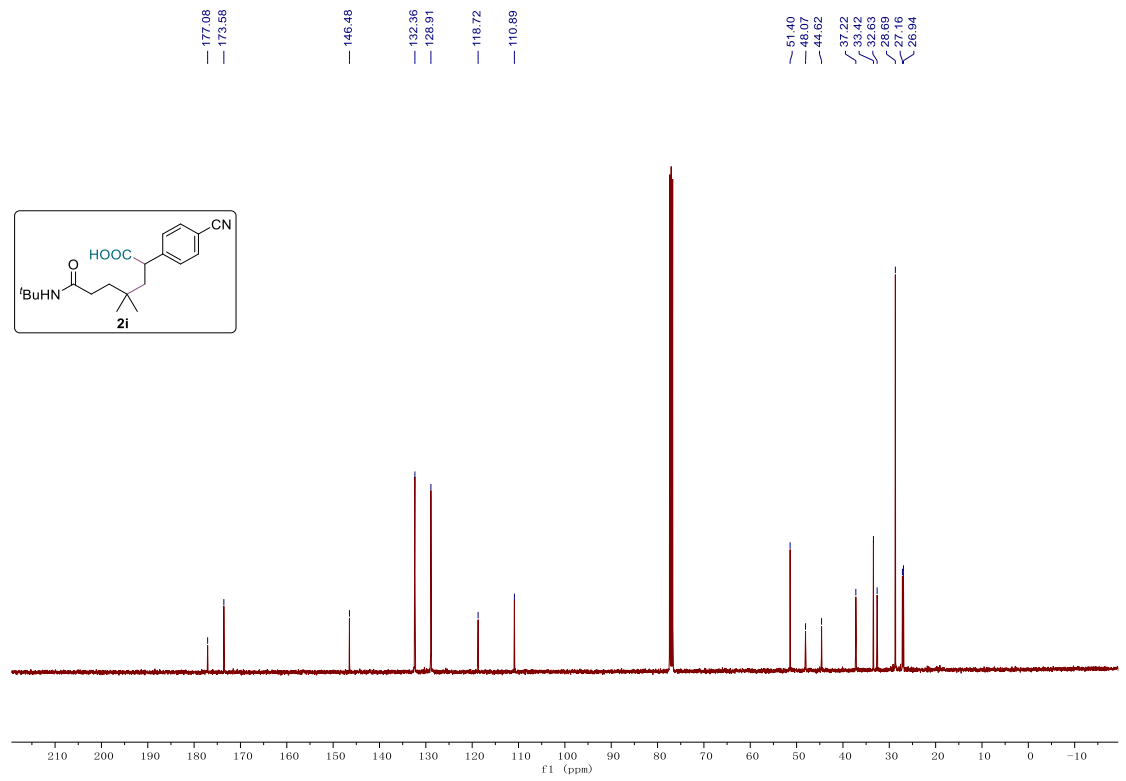



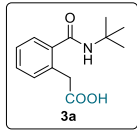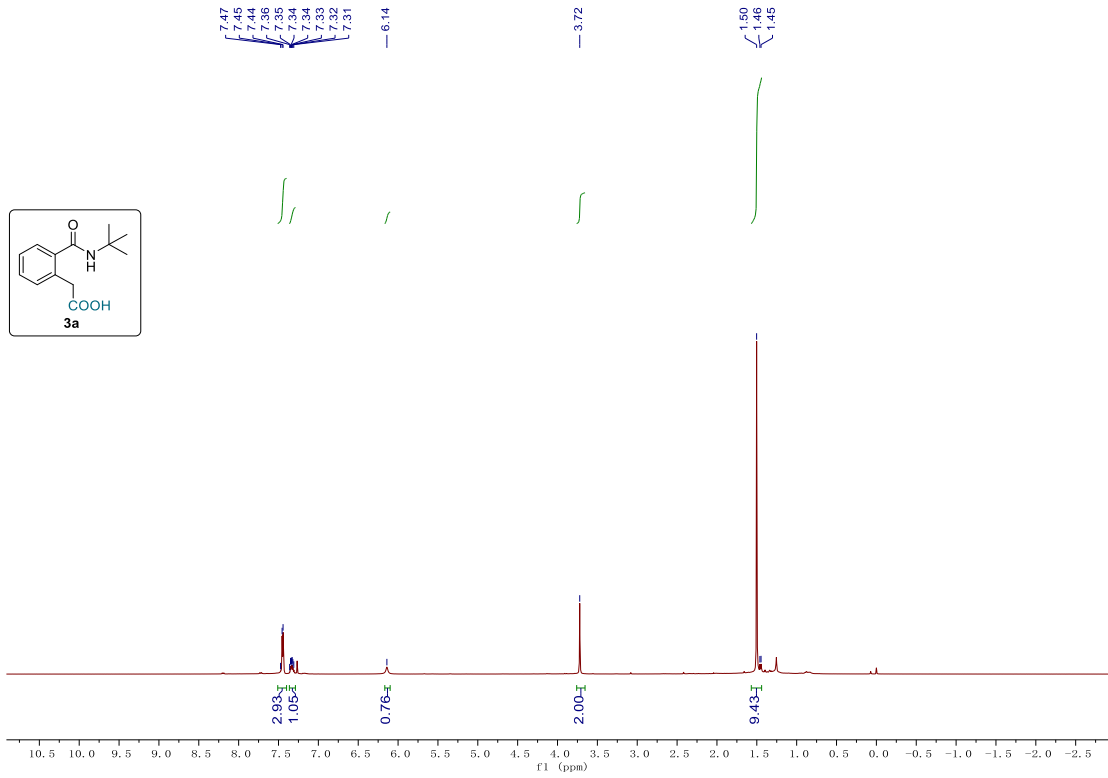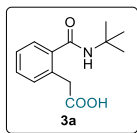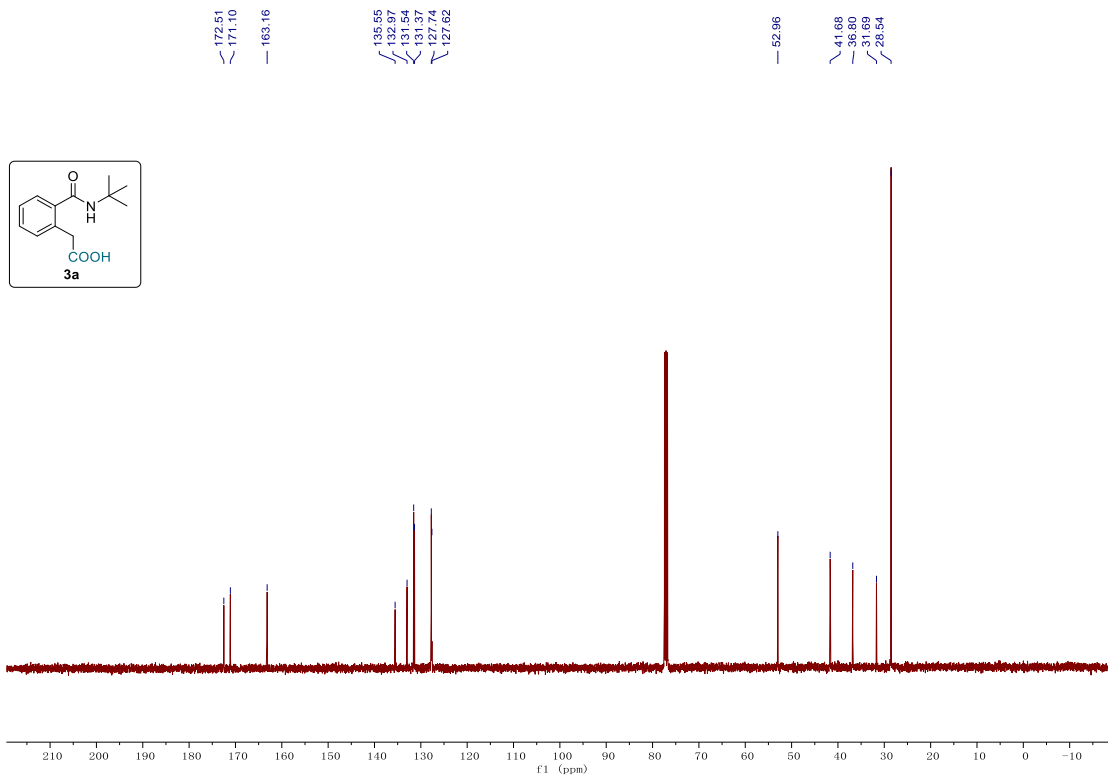

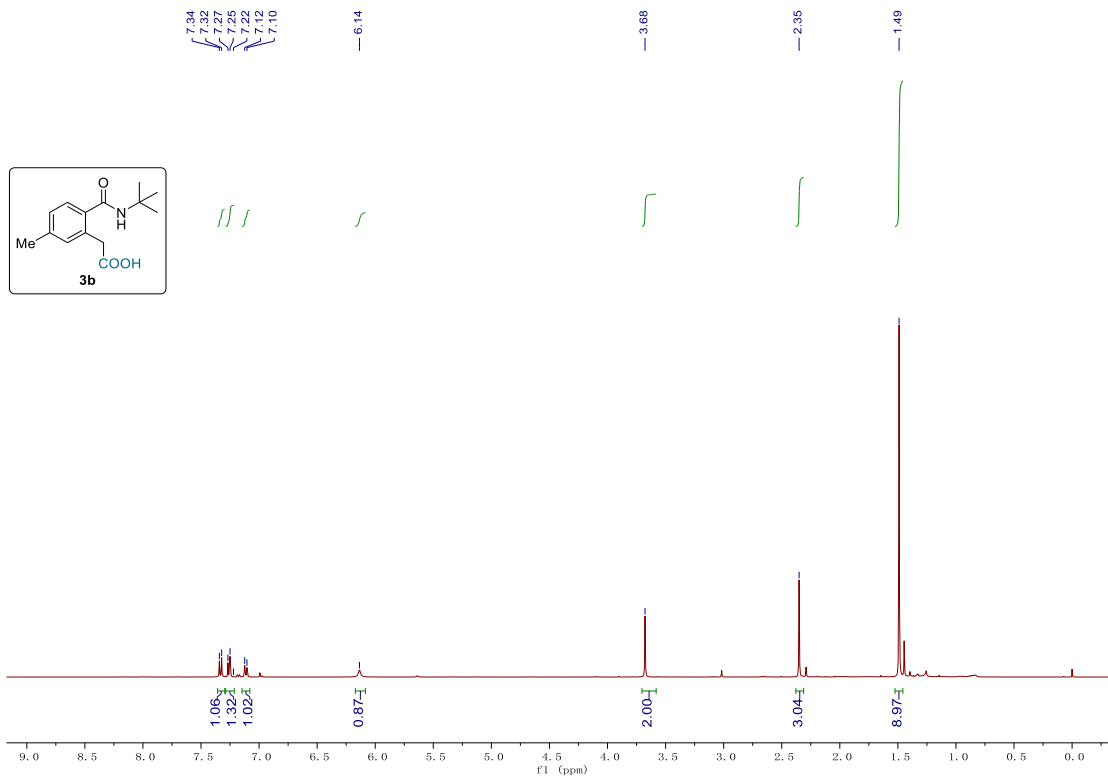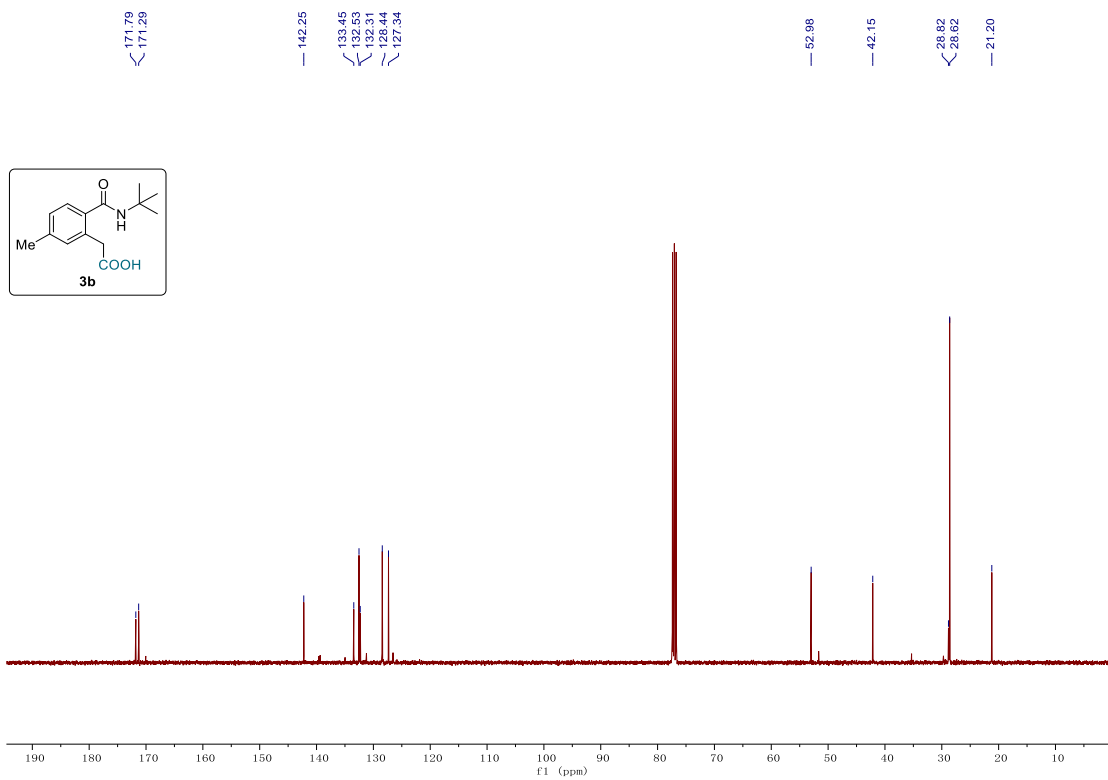

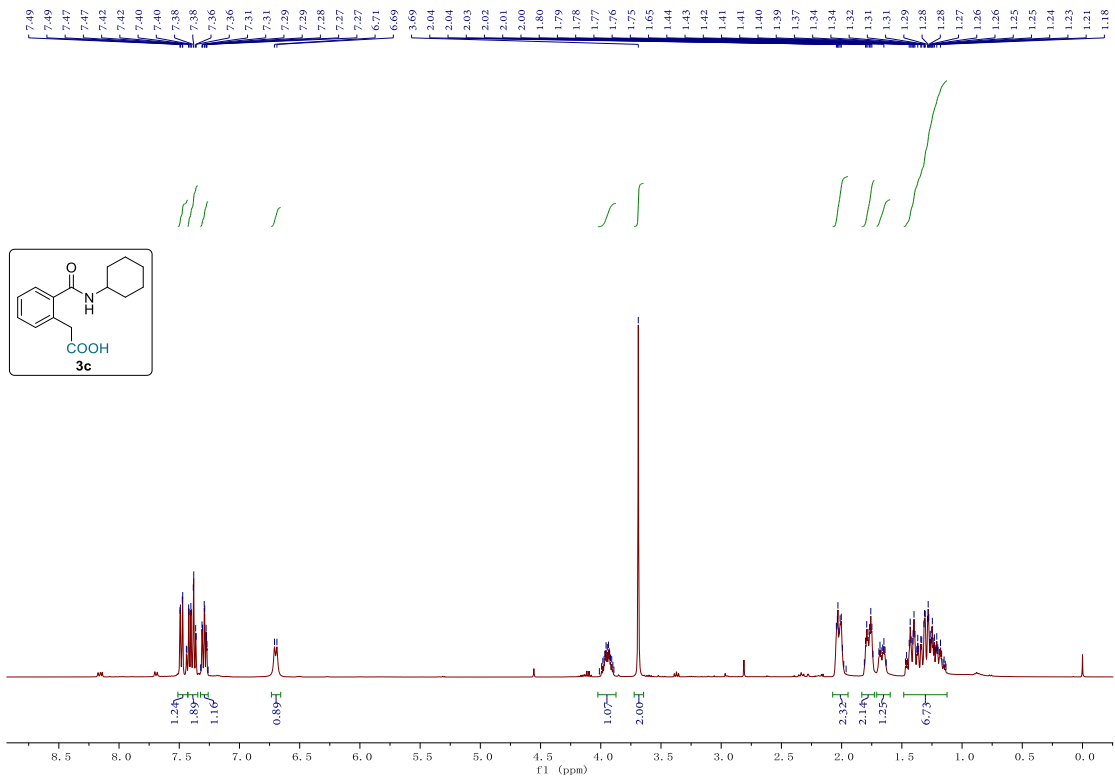

1wk-478-re-C. 1. fid

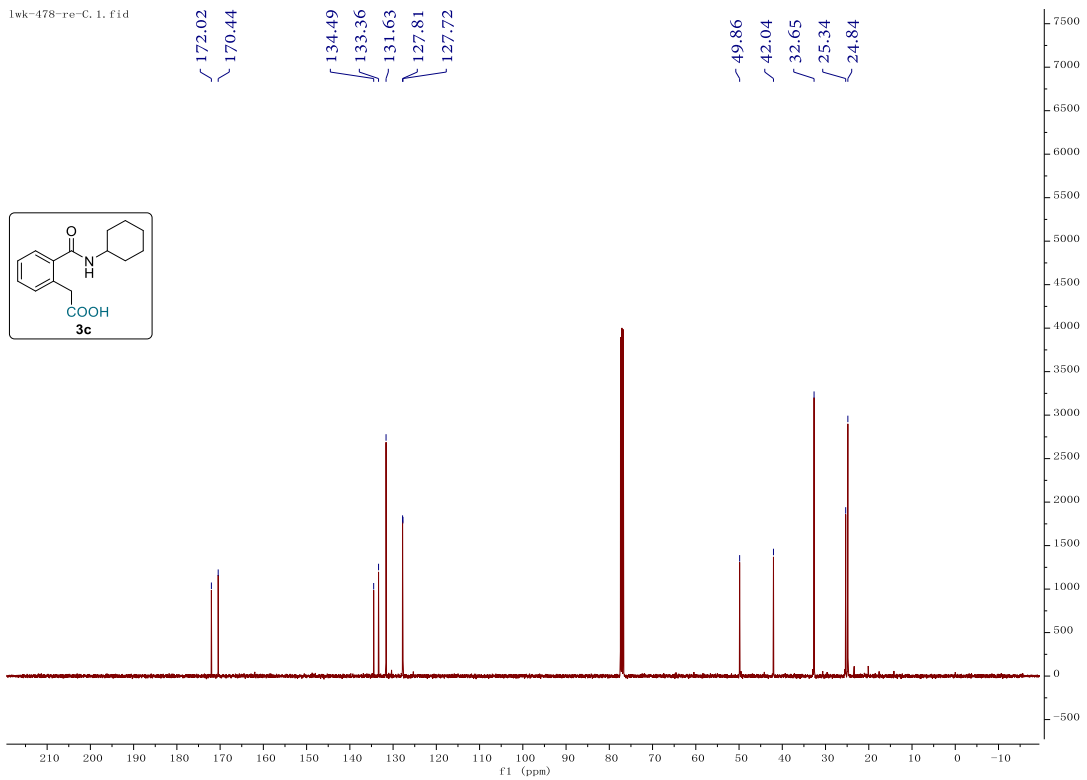

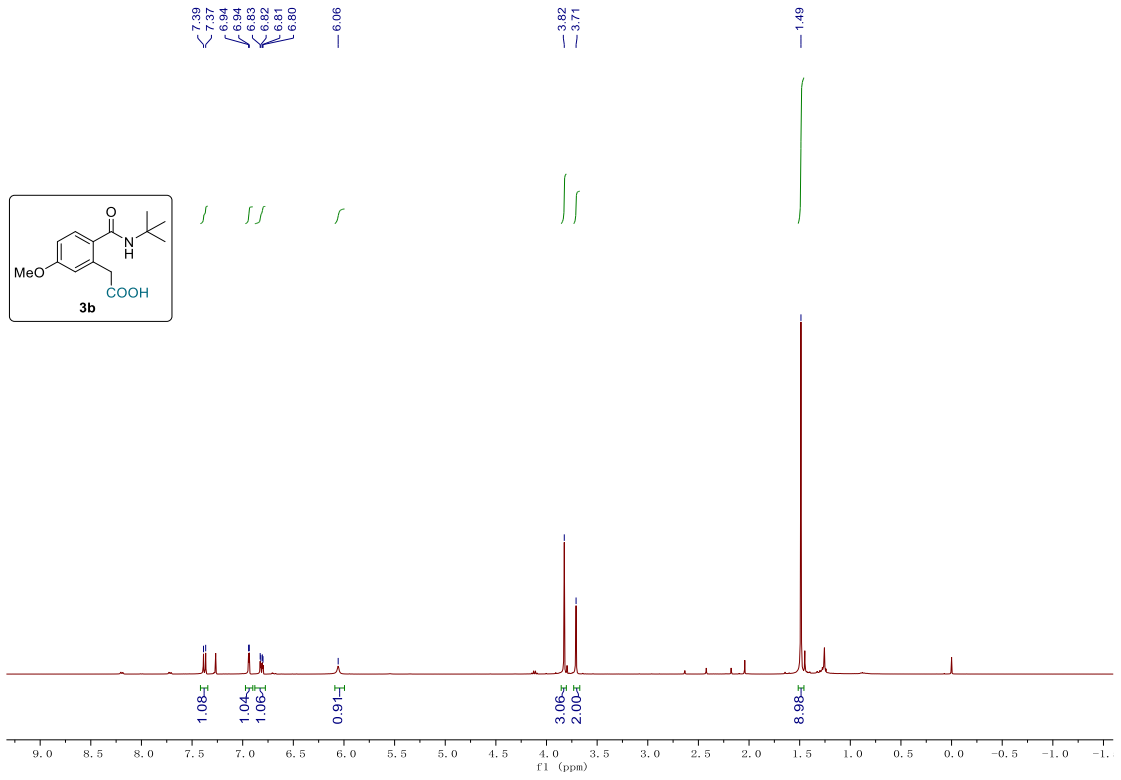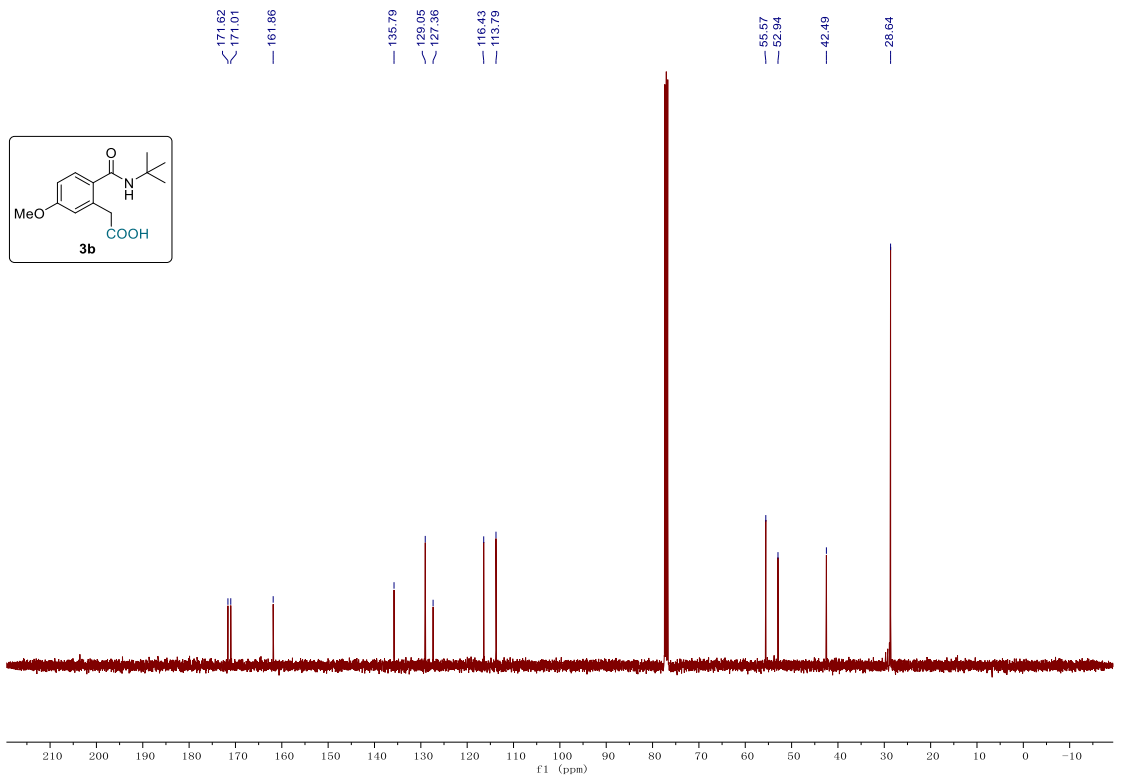

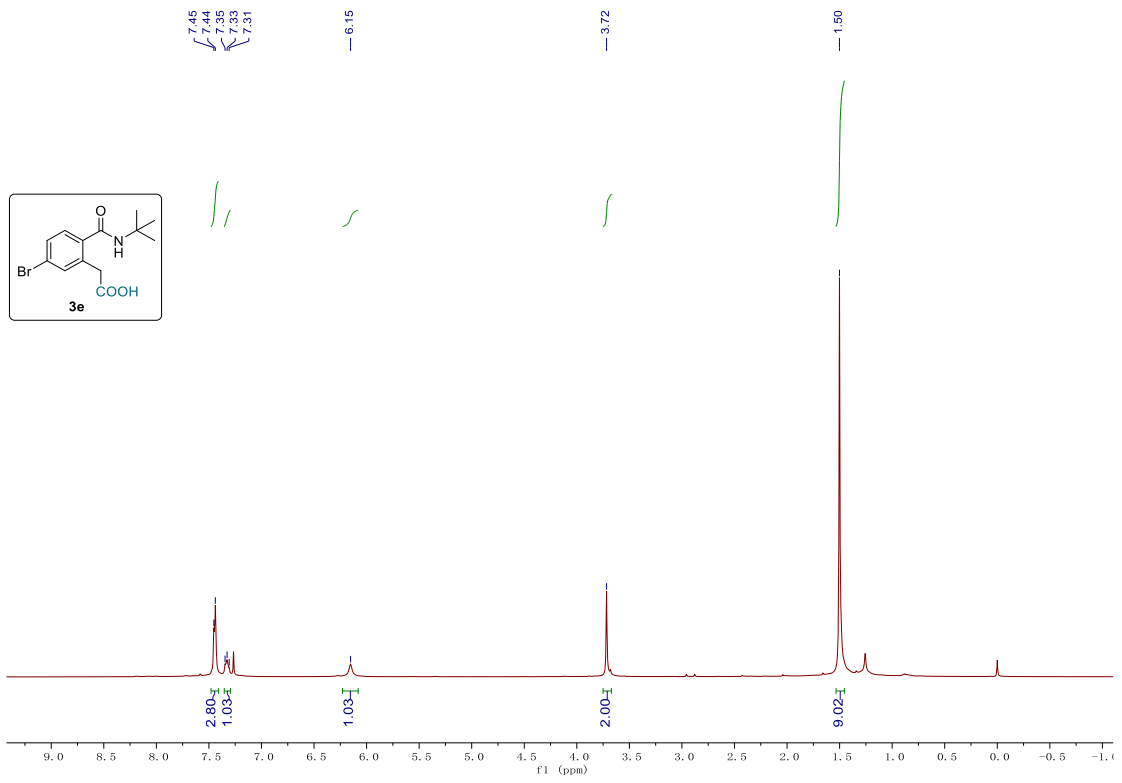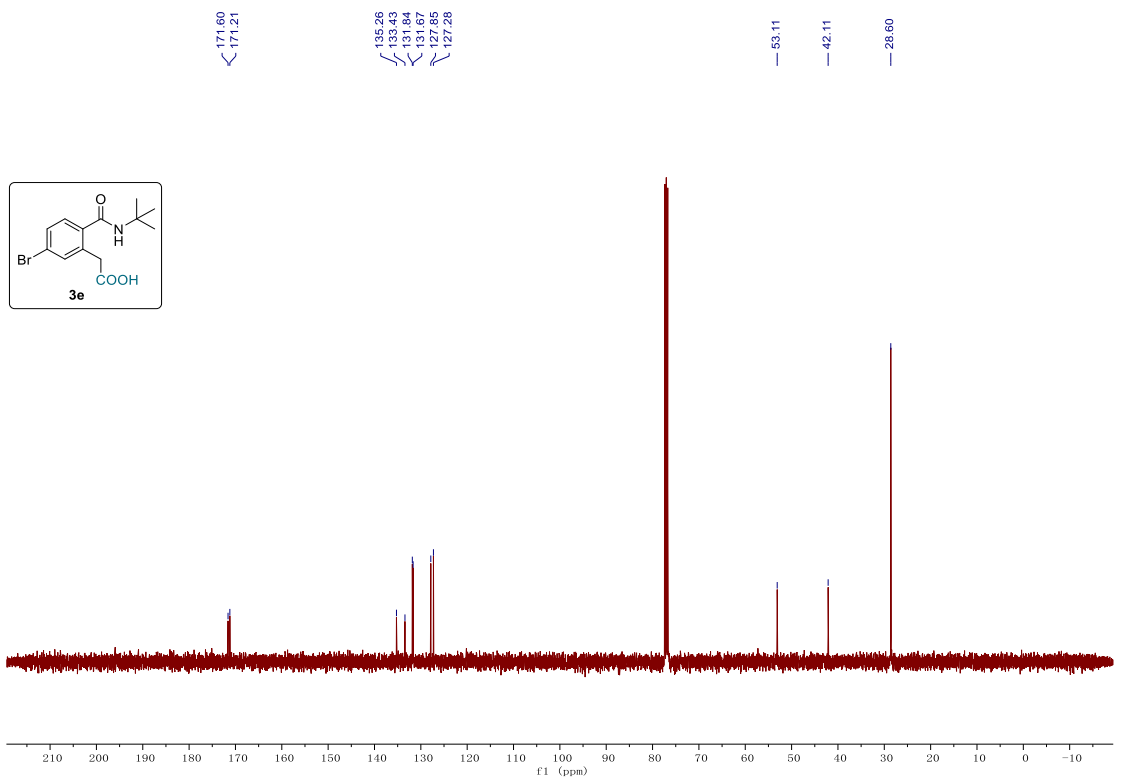



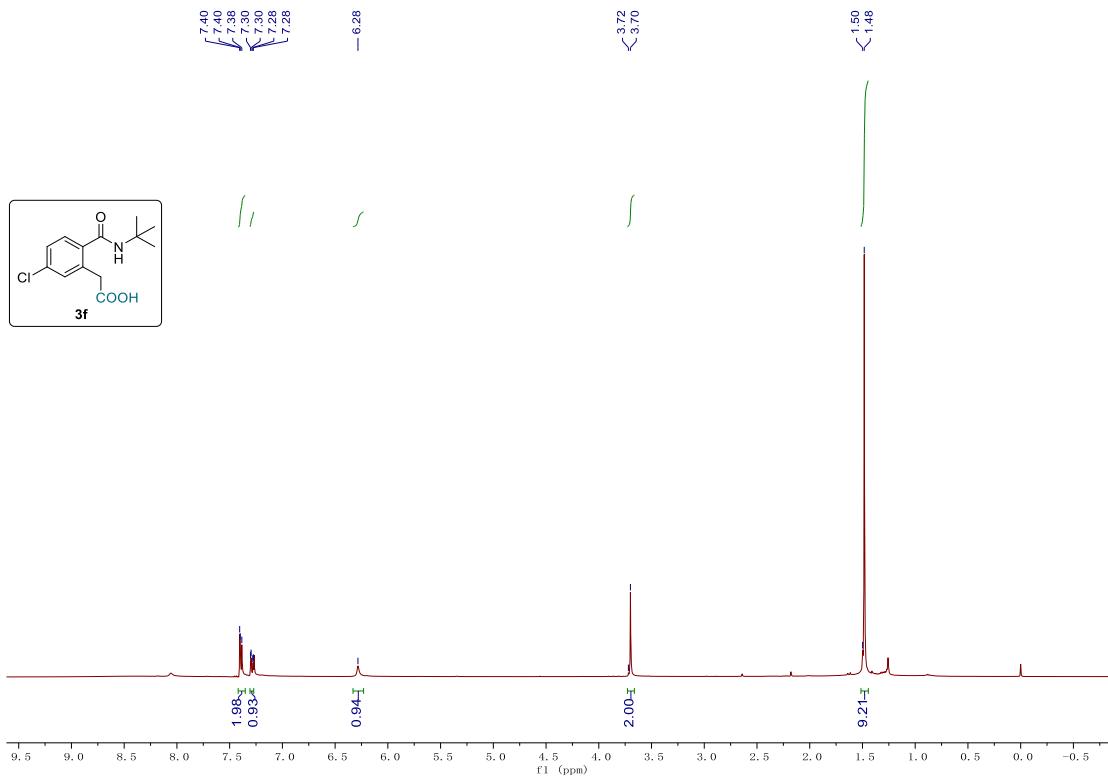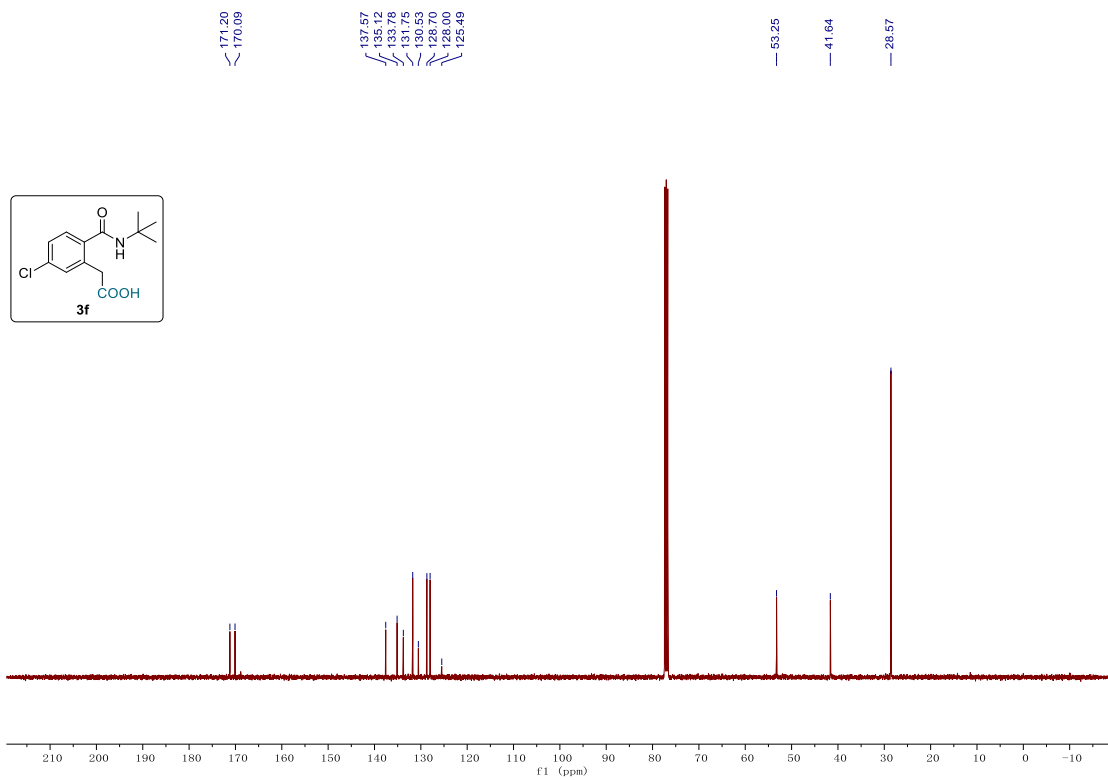

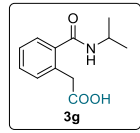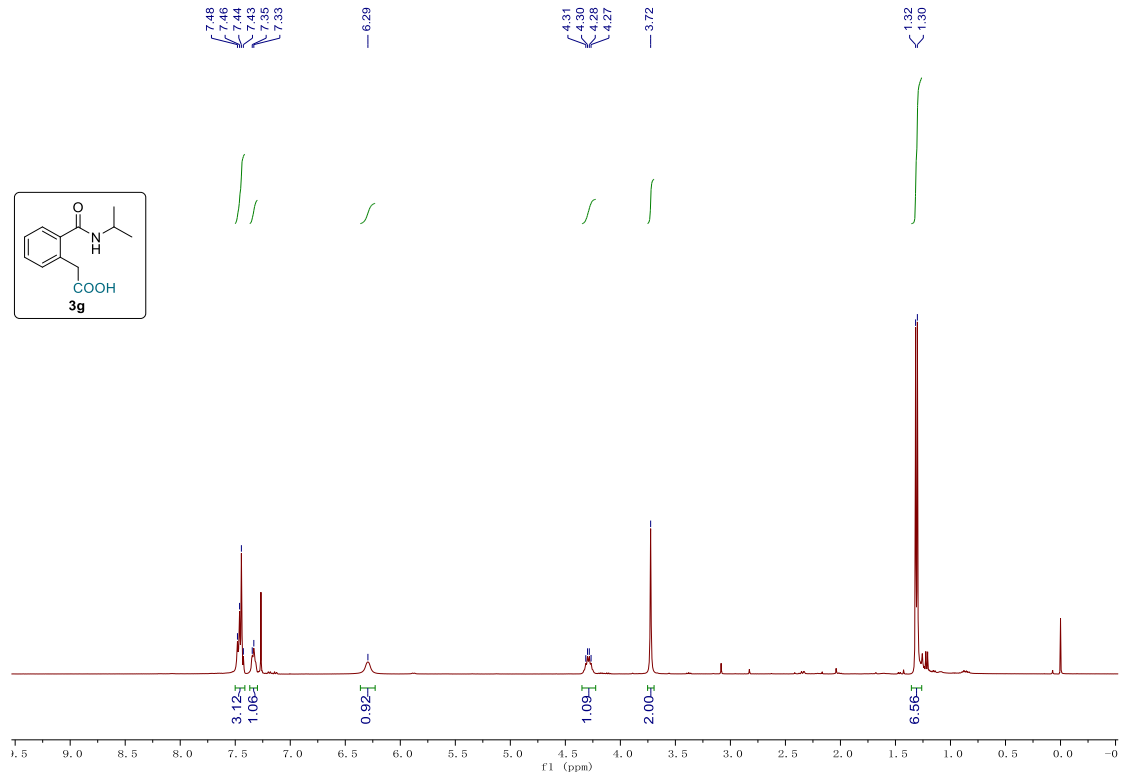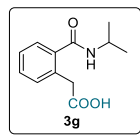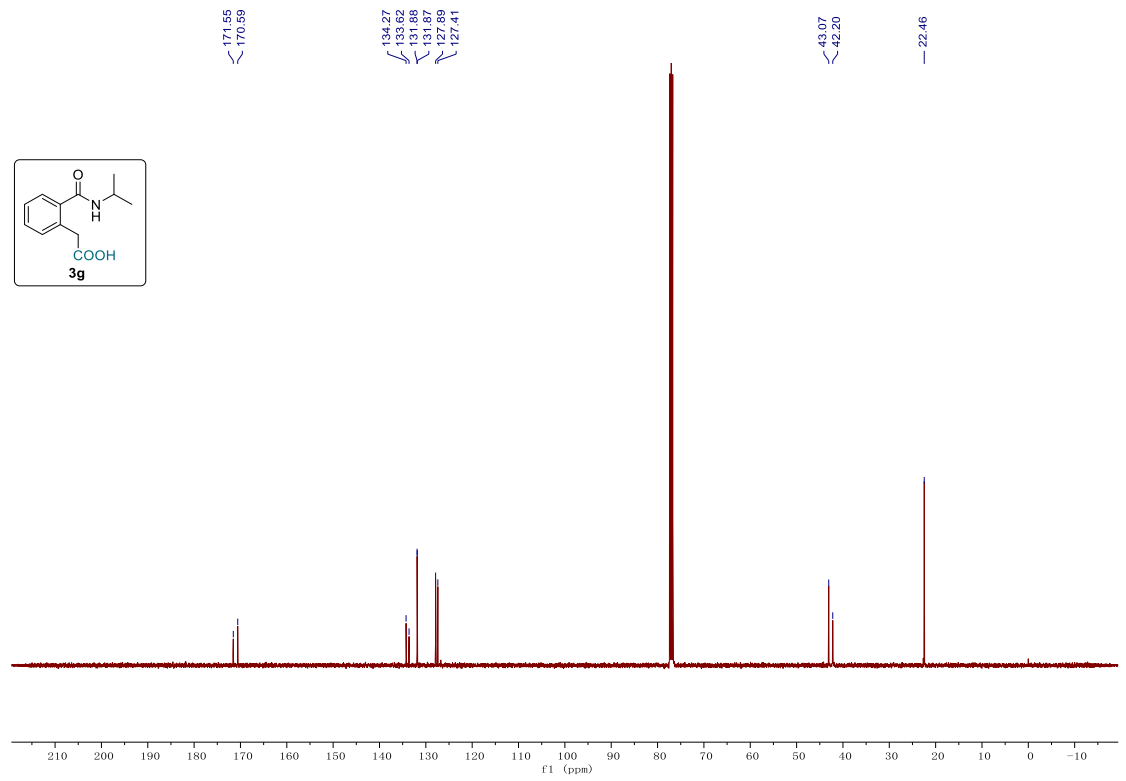

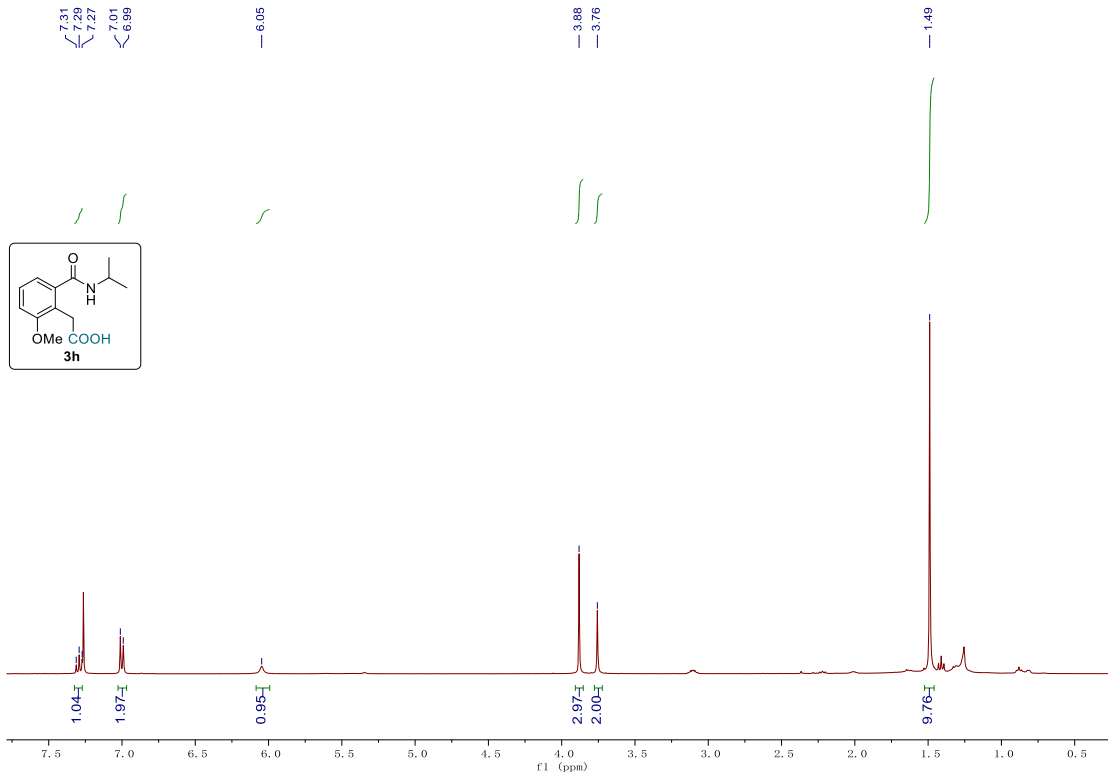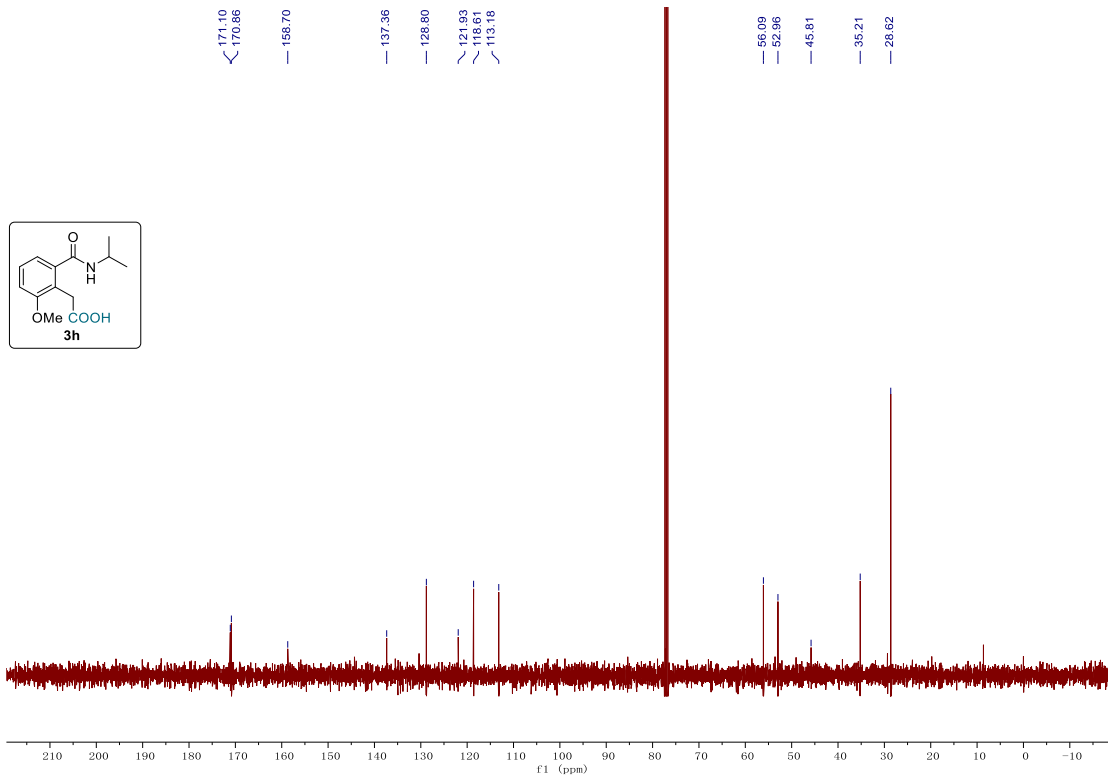

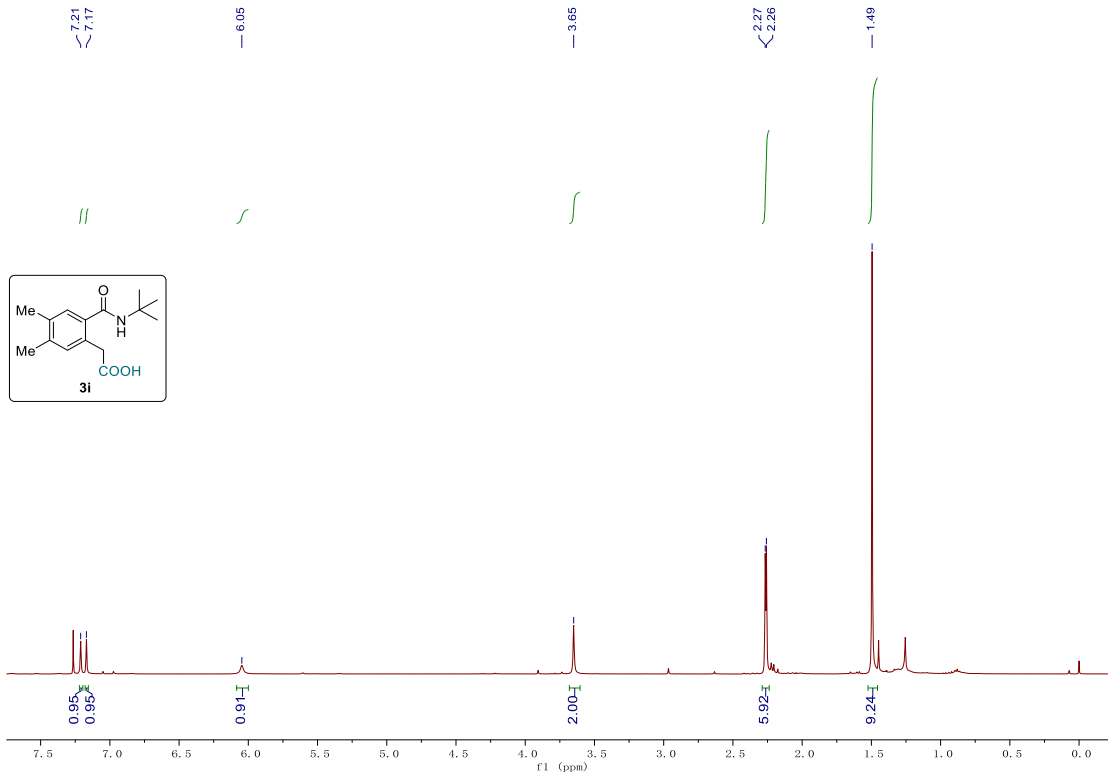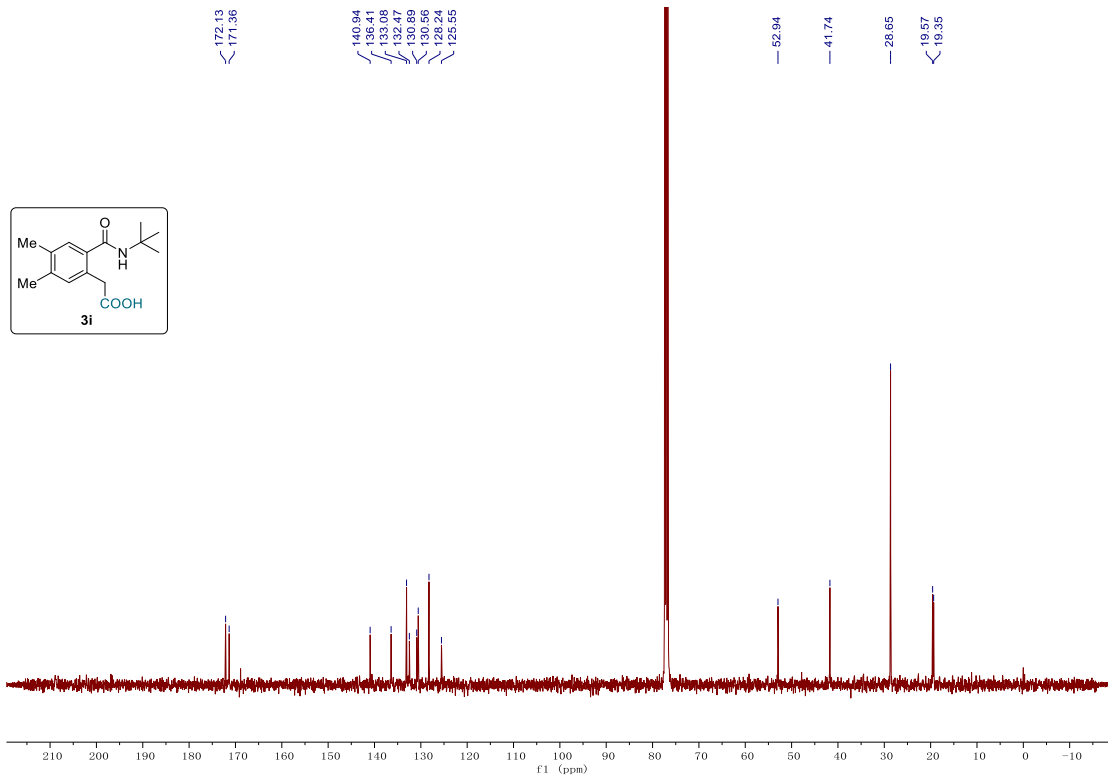

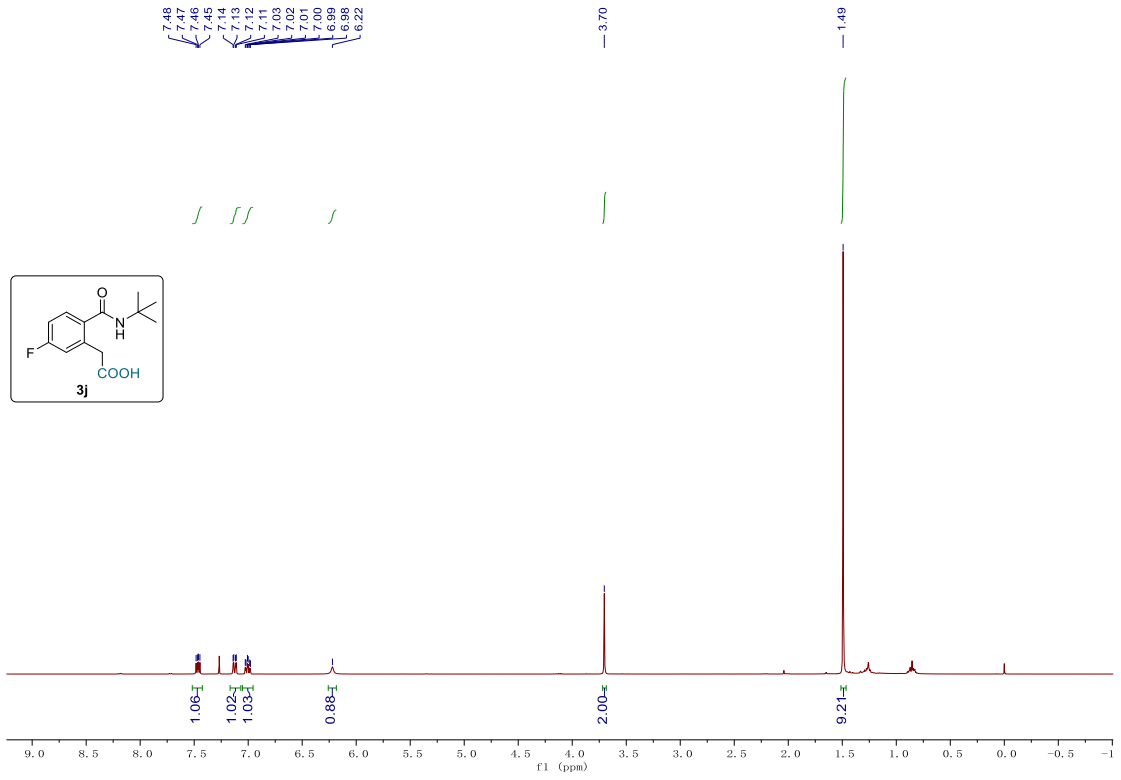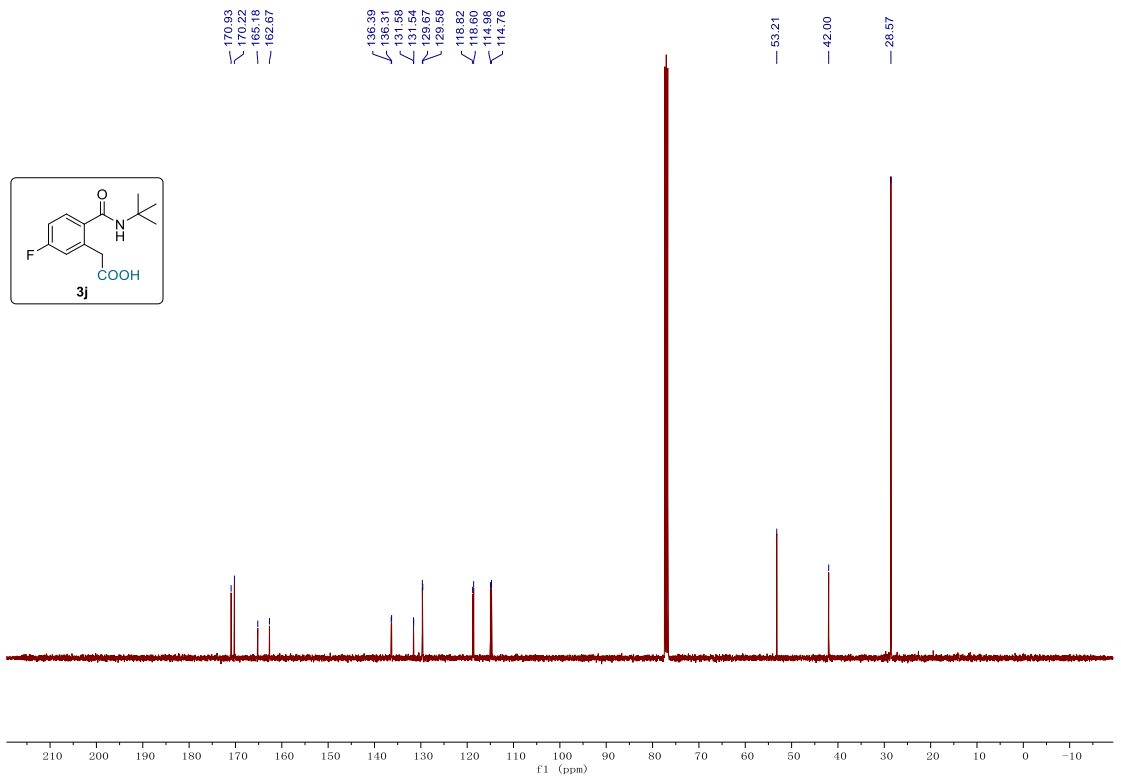

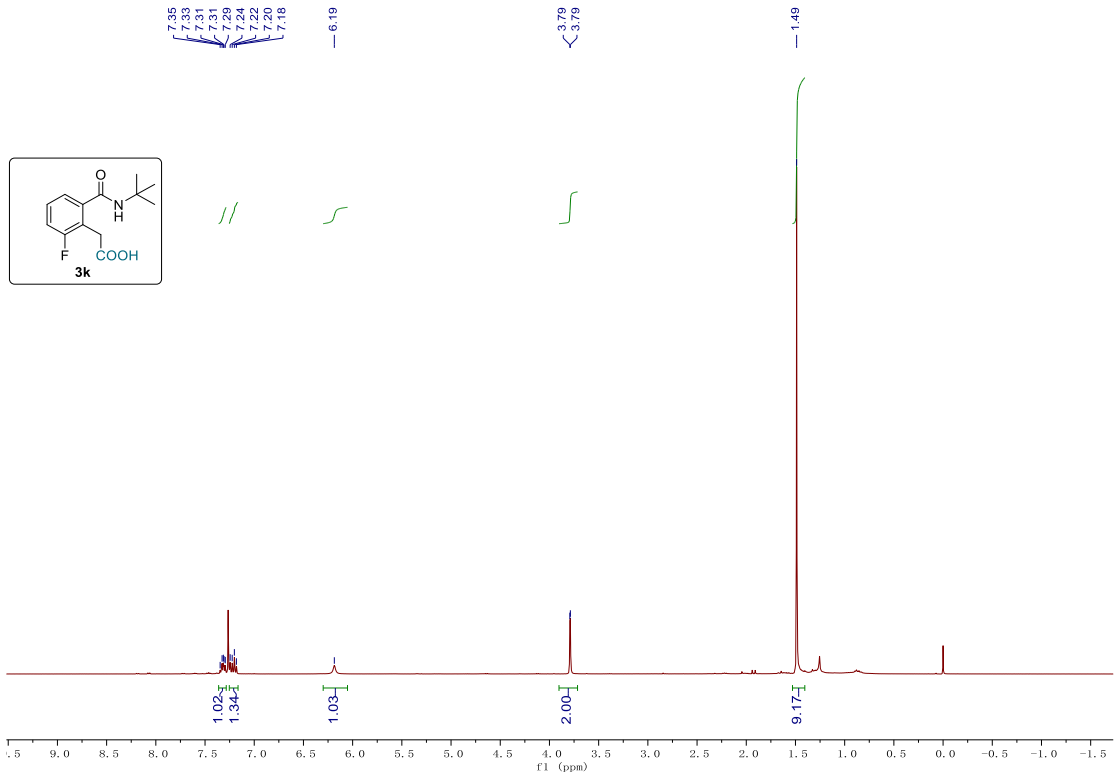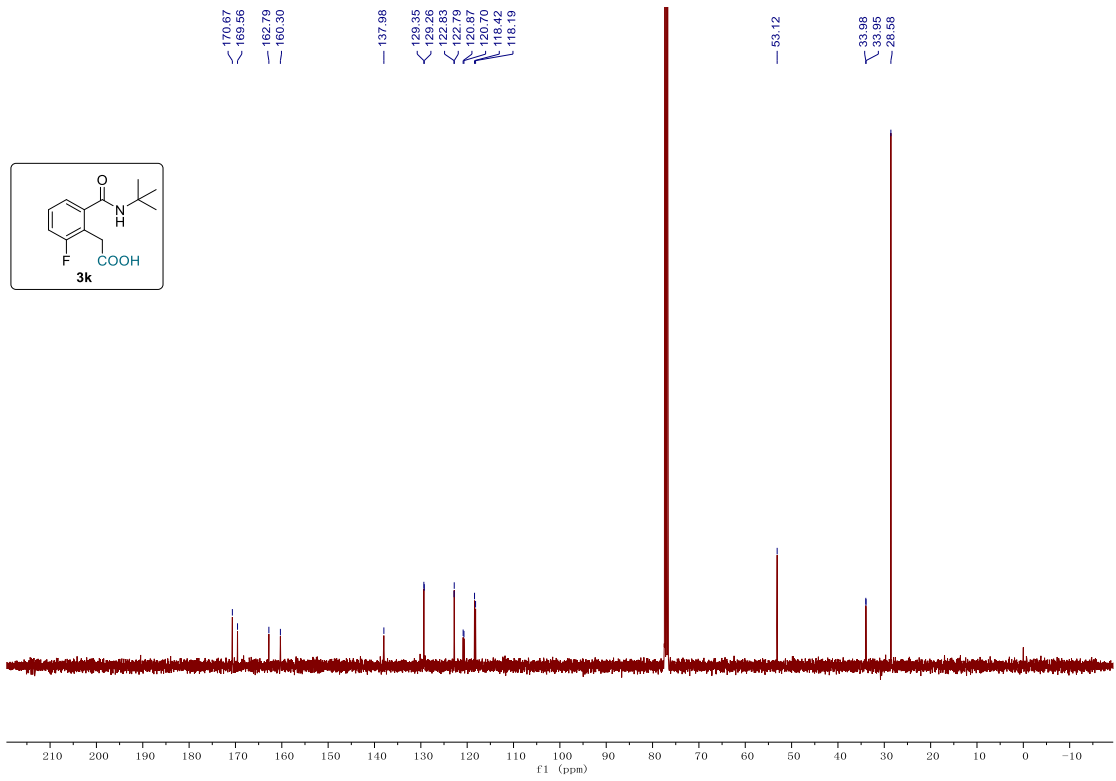

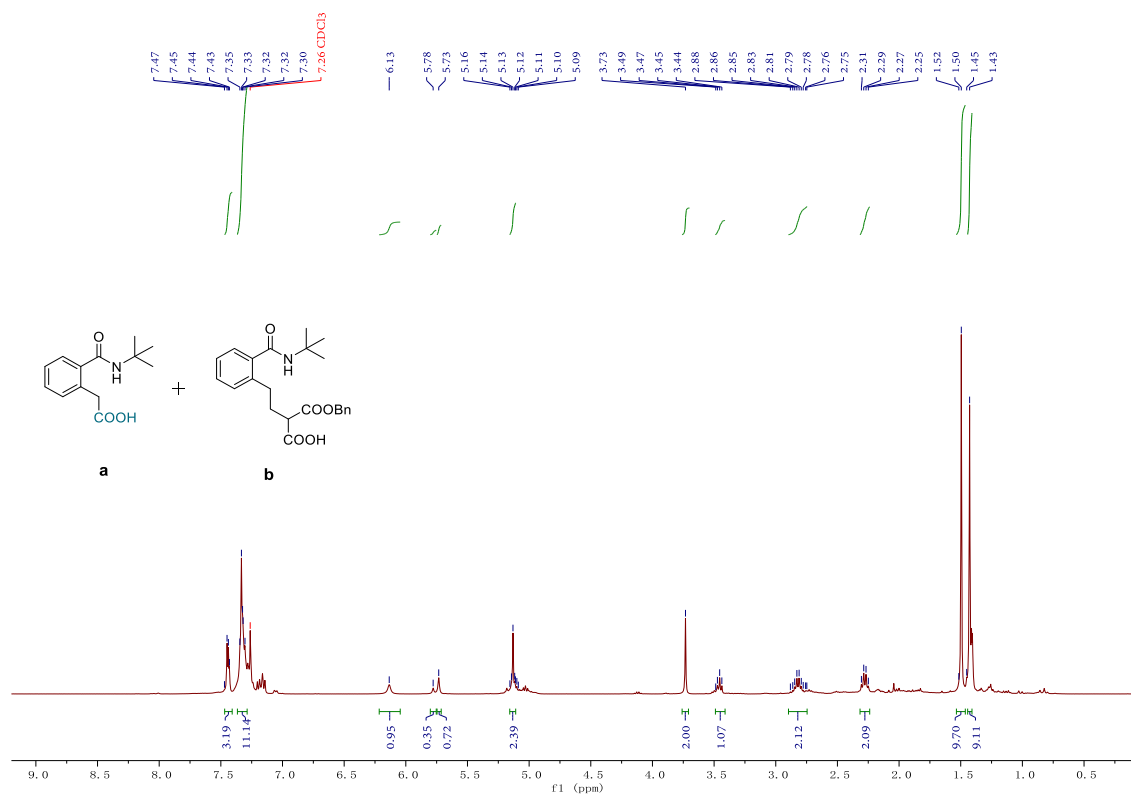

<sup>1</sup>H NMR of mixture (a:b molar ratio = 1:1)

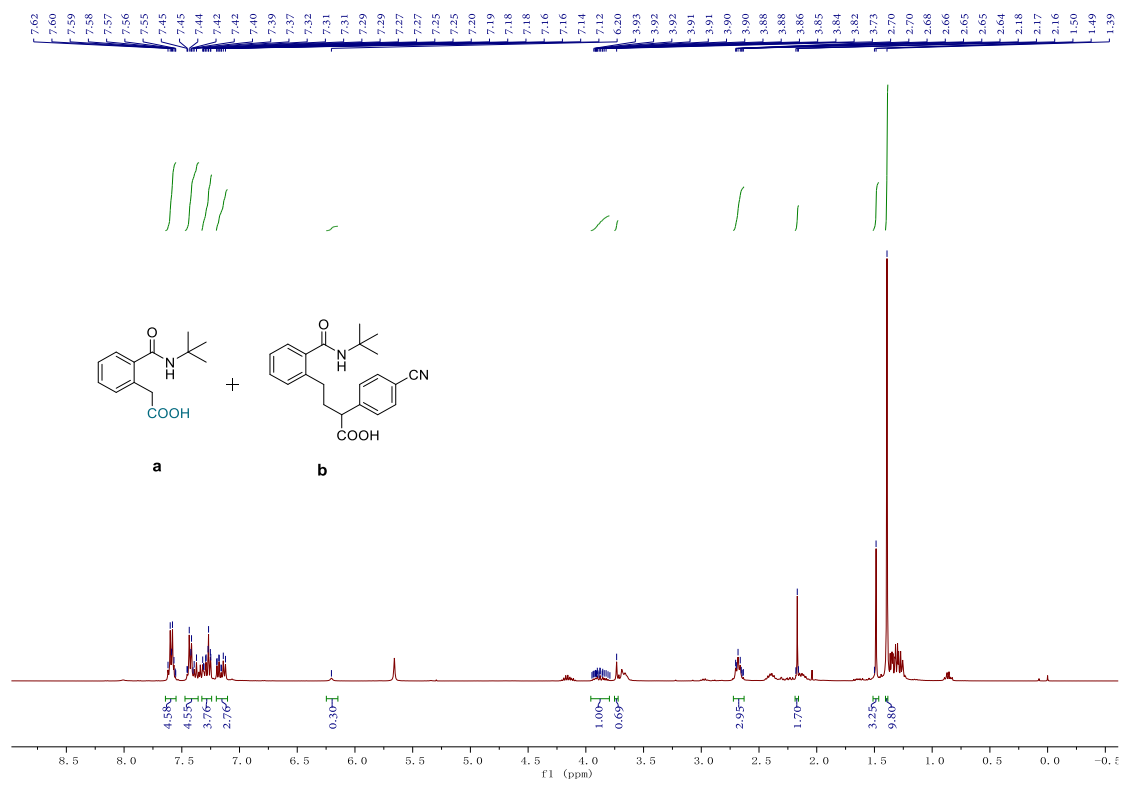

<sup>1</sup>H NMR of mixture (a:b molar ratio = 1:3)



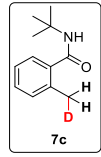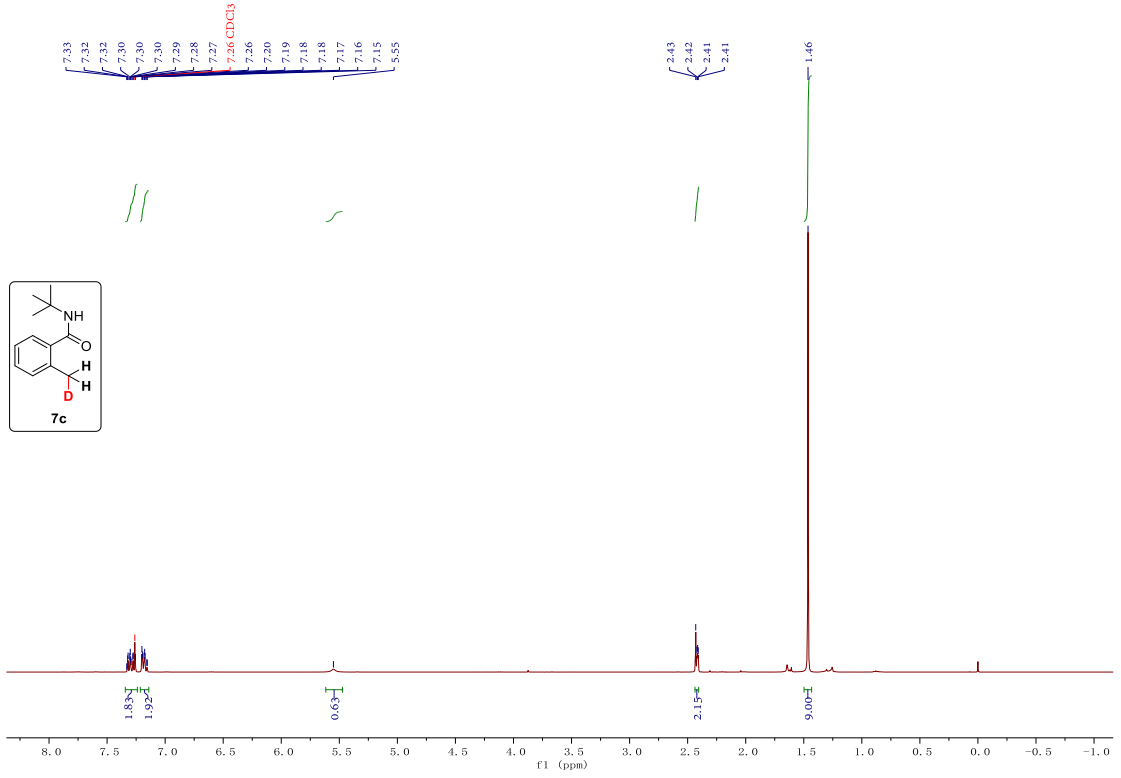

## 8. References

1. Chen, H.; Guo, L.; Yu, S., Primary, Secondary, and Tertiary gamma-C(sp<sup>3</sup>)-H Vinylation of Amides via Organic Photoredox-Catalyzed Hydrogen Atom Transfer. *Org Lett* **2018**, *20*(19), 6255-6259.
2. Ruan, X.-Y.; Zhang, T.; Li, W.-A.; Yin, Y.-Z.; Han, Z.-Y.; Gong, L.-Z., Photoinduced and palladium-catalyzed hydrogen atom transfer triggered 1,2-difunctionalization of 1,3-dienes with hydroxamides. *Science China Chemistry* **2022**, *65*(5), 863-869.
3. Xia Y, Liu Z, Feng S, et al. Ir (III)-catalyzed aromatic C–H bond functionalization via metal carbene migratory insertion[J]. *The Journal of Organic Chemistry*, 2015, *80*(1): 223-236.
